# Supplementary material for: Combined multi-omics and physiological approaches to elucidate drought-response mechanisms of durum wheat
Source: Front Plant Sci. 2025 May 15;16:1540179. doi: 10.3389/fpls.2025.1540179 (PMC12119503; doi:10.3389/fpls.2025.1540179)
Supplement: Supplementary file 2 [file DataSheet1.xlsx]

## Sheet: Table S1
Table S1. List of 225 durum wheat genotypes used in this study for genome-wide association analysis
N	ID	Country	Institution
1	QUC 3679-2016	Chile	INIA
2	QUC 3586-2016	Chile	INIA
3	QUC 3593-2017	Chile	INIA
4	QUC 3526-2017	Chile	INIA
5	QUC 3536-2018	Chile	INIA
6	QUC 3401-2018	Chile	INIA
7	QUC 3492-2018	Chile	INIA
8	QUC 3493-2018	Chile	INIA
9	QUC 3556-2018	Chile	INIA
10	QUC 3558-2018	Chile	INIA
11	QUC 3572-2018	Chile	INIA
12	QUC 3581-2018	Chile	INIA
13	QUC 3584-2018	Chile	INIA
14	QUC 3326-2019	Chile	INIA
15	QUC 3117-2020	Mexico	CIMMYT
16	QUC 3312-2019	Chile	INIA
17	QUC 3319-2020	Mexico	CIMMYT
18	QUC 3316-2019	Mexico	CIMMYT
19	QUC 3315-2019	Mexico	CIMMYT
20	QUC 3314-2019	Mexico	CIMMYT
21	QUC 3311-2019	Mexico	CIMMYT
22	QUC 3317-2019	Mexico	CIMMYT
23	QUC 3306-2019	Mexico	CIMMYT
24	QUC 3301-2019	Mexico	CIMMYT
25	QUC 3313-2019	Mexico	CIMMYT
26	QUC 3305-2019	Mexico	CIMMYT
27	QUC 3658-2020	Mexico	CIMMYT
28	QUC 3661-2020	Mexico	CIMMYT
29	QUC 3207-2020	Mexico	CIMMYT
30	QUC 3208-2020	Mexico	CIMMYT
31	QUC 3209-2020	Mexico	CIMMYT
32	QUC 3210-2020	Mexico	CIMMYT
33	QUC 3211-2020	Mexico	CIMMYT
34	QUC 3212-2020	Mexico	CIMMYT
35	QUC 3213-2020	Mexico	CIMMYT
36	QUC 3214-2020	Mexico	CIMMYT
37	QUC 3662-2020	Mexico	CIMMYT
38	QUC 3663-2020	Mexico	CIMMYT
39	QUC 3218-2020	Mexico	CIMMYT
40	QUC 3669-2020	Mexico	CIMMYT
41	QUC 3220-2020	Mexico	CIMMYT
42	QUC 3221-2020	Mexico	CIMMYT
43	QUC 3677-2020	Mexico	CIMMYT
44	QUC 3223-2020	Mexico	CIMMYT
45	QUC 3224-2020	Mexico	CIMMYT
46	QUC 3225-2020	Mexico	CIMMYT
47	QUC 3509-2017	Chile	INIA
48	QUC 3594-2017	Chile	INIA
49	QUC 3672-2018	Chile	INIA
50	QUC 3613-2017	Chile	INIA
51	QUC 3528-2017	Chile	INIA
52	QUC 3529-2017	Chile	INIA
53	QUC 3679-2016	Chile	INIA
54	QUC 3526-2017	Chile	INIA
55	QUC 3448-2017	Chile	INIA
56	QUC 3678-2016	Chile	INIA
57	QUC 3555-2017	Chile	INIA
58	QUC 3454-2017	Chile	INIA
59	QUC 3448-2017	Chile	INIA
60	QUC 3678-2016	Chile	INIA
61	QUC 3454-2017	Chile	INIA
62	QUC 3517-2017	Chile	INIA
63	QUC 3555-2017	Chile	INIA
64	QUC 3531-2018	Chile	INIA
65	QUC 3534-2018	Chile	INIA
66	QUC 3487-2018	Chile	INIA
67	QUC 3489-2018	Chile	INIA
68	QUC 3532-2018	Chile	INIA
69	QUC 3328-2019	Chile	INIA
70	QUC 3404-2020	Mexico	CIMMYT
71	QUC 3406-2020	Mexico	CIMMYT
72	QUC 3407-2020	Mexico	CIMMYT
73	QUC 3408-2020	Mexico	CIMMYT
74	QUC 3409-2020	Mexico	CIMMYT
75	QUC 3410-2020	Mexico	CIMMYT
76	QUC 3411-2020	Mexico	CIMMYT
77	QUC 3412-2020	Mexico	CIMMYT
78	QUC 3413-2020	Mexico	CIMMYT
79	QUC 3414-2020	Mexico	CIMMYT
80	QUC 3416-2020	Mexico	CIMMYT
81	QUC 3417-2020	Mexico	CIMMYT
82	QUC 3418-2020	Mexico	CIMMYT
83	QUC 3419-2020	Mexico	CIMMYT
84	QUC 3420-2020	Mexico	CIMMYT
85	QUC 3421-2020	Mexico	CIMMYT
86	QUC 3422-2020	Mexico	CIMMYT
87	QUC 3423-2020	Mexico	CIMMYT
88	QUC 3424-2020	Mexico	CIMMYT
89	QUC 3425-2020	Mexico	CIMMYT
90	QUC 3501-2020	Chile	INIA
91	QUC 3502-2020	Chile	INIA
92	QUC 3507-2020	Chile	INIA
93	QUC 3513-2020	Chile	INIA
94	QUC 3521-2020	Chile	INIA
95	QUC 3522-2020	Chile	INIA
96	QUC 3527-2020	Chile	INIA
97	QUC 3528-2020	Chile	INIA
98	QUC 3543-2020	Chile	INIA
99	QUC 3544-2020	Chile	INIA
100	QUC 3545-2020	Chile	INIA
101	QUC 3546-2020	Chile	INIA
102	QUC 3555-2020	Chile	INIA
103	QUC 3556-2020	Chile	INIA
104	QUC 3558-2020	Chile	INIA
105	QUC 3559-2020	Chile	INIA
106	QUC 3561-2020	Chile	INIA
107	QUC 3562-2020	Chile	INIA
108	QUC 3679-2020	Mexico	CIMMYT
109	QUC 3581-2020	Mexico	CIMMYT
110	QUC 3582-2020	Mexico	CIMMYT
111	QUC 35783-2020	Mexico	CIMMYT
112	QUC 3584-2020	Mexico	CIMMYT
113	QUC 3585-2020	Mexico	CIMMYT
114	QUC 3586-2020	Mexico	CIMMYT
115	QUC 3588-2020	Mexico	CIMMYT
116	QUC 3589-2020	Mexico	CIMMYT
117	QUC 3590-2020	Mexico	CIMMYT
118	QUC 3591-2020	Mexico	CIMMYT
119	QUC 3592-2020	Mexico	CIMMYT
120	QUC 3593-2020	Mexico	CIMMYT
121	QUC 3594-2020	Mexico	CIMMYT
122	QUC 3595-2020	Mexico	CIMMYT
123	QUC 3596-2020	Mexico	CIMMYT
124	QUC 3597-2020	Mexico	CIMMYT
125	QUC 3598-2020	Mexico	CIMMYT
126	QUC 3599-2020	Mexico	CIMMYT
127	QUC 3601-2020	Mexico	CIMMYT
128	QUC 3602-2020	Mexico	CIMMYT
129	QUC 3603-2020	Mexico	CIMMYT
130	QUC 3604-2020	Mexico	CIMMYT
131	QUC 3605-2020	Mexico	CIMMYT
132	QUC 3606-2020	Mexico	CIMMYT
133	QUC 3607-2020	Mexico	CIMMYT
134	QUC 3608-2020	Mexico	CIMMYT
135	QUC 3609-2020	Mexico	CIMMYT
136	QUC 3610-2020	Mexico	CIMMYT
137	QUC 3611-2020	Mexico	CIMMYT
138	QUC 3612-2020	Mexico	CIMMYT
139	QUC 3613-2020	Mexico	CIMMYT
140	QUC 3614-2020	Mexico	CIMMYT
141	QUC 3615-2020	Mexico	CIMMYT
142	QUC 3616-2020	Mexico	CIMMYT
143	QUC 3617-2020	Mexico	CIMMYT
144	QUC 3618-2020	Mexico	CIMMYT
145	QUC 3619-2020	Mexico	CIMMYT
146	QUC 3621-2020	Mexico	CIMMYT
147	QUC 3622-2020	Mexico	CIMMYT
148	QUC 3623-2020	Mexico	CIMMYT
149	QUC 3624-2020	Mexico	CIMMYT
150	QUC 3625-2020	Mexico	CIMMYT
151	QUC 3626-2020	Mexico	CIMMYT
152	QUC 3627-2020	Mexico	CIMMYT
153	QUC 3628-2020	Mexico	CIMMYT
154	QUC 3629-2020	Mexico	CIMMYT
155	QUC 3630-2020	Mexico	CIMMYT
156	QUC 3631-2020	Mexico	CIMMYT
157	QUC 3632-2020	Mexico	CIMMYT
158	QUC 3633-2020	Mexico	CIMMYT
159	QUC 3634-2020	Mexico	CIMMYT
160	QUC 3635-2020	Mexico	CIMMYT
161	QUC 3636-2020	Mexico	CIMMYT
162	QUC 3637-2020	Mexico	CIMMYT
163	QUC 3638-2020	Mexico	CIMMYT
164	QUC 3639-2020	Mexico	CIMMYT
165	H-7103	Chile	INIA
166	H-7106	Chile	INIA
167	H-7121	Chile	INIA
168	H-7405	Chile	INIA
169	H-7411	Chile	INIA
170	H-7112	Chile	INIA
171	H-7107	Chile	INIA
172	H-7413	Chile	INIA
173	H-7117	Chile	INIA
174	H-7102	Chile	INIA
175	QUC 3642-2020	Mexico	CIMMYT
176	QUC 3643-2020	Mexico	CIMMYT
177	QUC 3653-2020	Mexico	CIMMYT
178	QUC 3654-2020	Mexico	CIMMYT
179	QUC 3655-2020	Mexico	CIMMYT
180	QUC 3656-2020	Mexico	CIMMYT
181	QUC 3657-2020	Mexico	CIMMYT
182	BRESCIA	Chile	PUC
183	AMBRA	Chile	PUC
184	UC-1218	Chile	PUC
185	QUEULE-INIA	Chile	INIA
186	LLEUQUE-INIA	Chile	INIA
187	QUC 3741-2020	Tunisia	INRAT
188	QUC 3742-2020	Tunisia	INRAT
189	H-7302	Chile	INIA
190	H-7303	Chile	INIA
191	H-7304	Chile	INIA
192	H-7306	Chile	INIA
193	H-7307	Chile	INIA
194	H-7308	Chile	INIA
195	H-7309	Chile	INIA
196	H-7311	Chile	INIA
197	H-7312	Chile	INIA
198	H-7313	Chile	INIA
199	H-7314	Chile	INIA
200	H-7316	Chile	INIA
201	H-7317	Chile	INIA
202	H-7318	Chile	INIA
203	H-7319	Chile	INIA
204	H-7321	Chile	INIA
205	H-7322	Chile	INIA
206	H-7323	Chile	INIA
207	H-7324	Chile	INIA
208	H-7202	Chile	INIA
209	H-7203	Chile	INIA
210	H-7204	Chile	INIA
211	H-7206	Chile	INIA
212	H-7207	Chile	INIA
213	H-7208	Chile	INIA
214	H-7211	Chile	INIA
215	H-7217	Chile	INIA
216	H-7218	Chile	INIA
217	H-7219	Chile	INIA
218	H-7221	Chile	INIA
219	H-7222	Chile	INIA
220	H-7223	Chile	INIA
221	H-7224	Chile	INIA
222	BONIDURO	Spain	IRTA
223	EURODURO	Spain	IRTA
224	GRADOR	Spain	IRTA
225	MIRADOUX	Spain	IRTA

## Sheet: Table S2
Table S2. Monthly accumulated precipitation (mm) and temperature (°C) data for each site and growing season
Month	Sites
	Santa Rosa				Los Tilos
	2021/2022		2022/2023		2021/2022		2022/2023
	Temperature (°C)	Precipitation (mm)	Temperature (°C)	Precipitation (mm)	Temperature (°C)	Precipitation (mm)	Temperature (°C)	Precipitation (mm)
July	-	-	-	-	9.6	0.9	8.1	96.9
August	8.6	95.6	8.7	121.8	10.3	39.3	10.1	39.3
September	10.3	95.6	10.7	68.4	12.4	10.3	11.6	8.1
Octuber	13	24.8	12.5	18.7	15.6	5.1	15.1	0.3
November	16	6	17.9	25.7	17.8	0.2	18.4	3
December	19.3	13	19.4	0	19.9	0	21	1.5
Juanary	19.1	1.6	20.1	7.4	20.2	0	20.8	0

## Sheet: Table S3
Table S3. Shapiro-Wilk test (P > 0.05) for the different traits at each environment, combined by treatment, and across all environment
	Trt	GY	TGW	HI	GPS	SPM
Site		Shapiro-Wilk test (P value)
LT_2022	Irrigated	0.1218	0.7482	< 2.2e-16	0.08132	0.2663
	Rainfed	1.189e-08	0.8848	2.2e-16	0.361	0.0003763
LT_2023	Irrigated	0.3829	9.383e-05	0.1879	0.1649	0.03351
	Rainfed	0.1506	0.2433	2.124e-05	0.04258	5.548e-07
SR_2022	Irrigated	0.8752	0.2422	0.5822	0.3001	2.881e-06
	Rainfed	0.01513	0.7971	0.001133	0.0003342	0.7478
SR_2023	Irrigated	0.01937	0.2813	0.002058	0.003396	0.001848
	Rainfed	0.2052	7.503e-05	7.68e-05	0.03115	0.01263
Combined	Irrigated	0.09379	0.9281	3.683e-10	0.7446	0.5896
	Rainfed	0.0004481	0.05682	2.122e-11	0.534	0.01654
All		0.2851	0.3407	2.937e-06	0.962	0.6866

## Sheet: Table S4
Table S4. Raw phenotypic data for the 225 durum wheat genotypes evaluated at 8 different sites under rainfed and irrigated conditions
Management	Environment	Site	Rep	Blk	Plot	Entry	GY	SPM	HI	GPS	TGW
Rainfed	SR_2022	1	1	1	1	36	59.6655	325	0.3361	30.28	47.675
Rainfed	SR_2022	1	1	1	2	215	39.37	400	0.34195	30.32	44.8681
Rainfed	SR_2022	1	1	1	3	49	33.1165	300	0.2424	34.8	38.908
Rainfed	SR_2022	1	1	1	4	102	43.542	350	0.2906	25.8	42.2481
Rainfed	SR_2022	1	1	1	5	151	37.324	345	0.276933	29.4	47.5374
Rainfed	SR_2022	1	1	1	6	65	41.981	460	0.31125	26.4	41.4697
Rainfed	SR_2022	1	1	1	7	72	48.571	270	0.2288	33	45.8424
Rainfed	SR_2022	1	1	1	8	93	31.5815	245	0.1933	34.52	43.2213
Rainfed	SR_2022	1	1	1	9	52	55.0335	390	0.37755	30.32	39.7889
Rainfed	SR_2022	1	1	1	10	209	43.034	300	0.27368	26.2	40.4122
Rainfed	SR_2022	1	1	1	11	109	40.63	485	0.308622	22.96	40.3484
Rainfed	SR_2022	1	1	1	12	48	38.2305	440	0.31105	27.04	40.5325
Rainfed	SR_2022	1	1	1	13	111	39.163	290	0.25336	21.76	48.8787
Rainfed	SR_2022	1	1	1	14	47	40.6575	240	0.3086	26.12	41.7917
Rainfed	SR_2022	1	1	1	15	188	40.16	350	0.2835	26.6	39.8496
Rainfed	SR_2022	1	1	2	16	31	42.086	350	0.327	22.24	40.7734
Rainfed	SR_2022	1	1	2	17	70	40.516	400	0.3233	26.48	38.7613
Rainfed	SR_2022	1	1	2	18	44	29.453	375	0.334067	17.88	42.3937
Rainfed	SR_2022	1	1	2	19	110	44.1265	325	0.289086	29.28	43.6339
Rainfed	SR_2022	1	1	2	20	106	41.4835	275	0.257067	27.08	38.5672
Rainfed	SR_2022	1	1	2	21	121	41.111	325	0.37176	30.84	33.3982
Rainfed	SR_2022	1	1	2	22	67	34.37	290	0.34656	20.12	47.8728
Rainfed	SR_2022	1	1	2	23	63	55.4875	340	0.328333	31.04	39.3041
Rainfed	SR_2022	1	1	2	24	84	47.229	260	0.2504	24.12	46.8988
Rainfed	SR_2022	1	1	2	25	27	50.3265	385	0.21455	21.72	52.7072
Rainfed	SR_2022	1	1	2	26	60	56.7605	375	0.28845	26.24	49.5732
Rainfed	SR_2022	1	1	2	27	129	40.7305	425	0.36264	31.6	42.9747
Rainfed	SR_2022	1	1	2	28	203	48.6095	375	0.21145	30.08	53.0585
Rainfed	SR_2022	1	1	2	29	79	58.706	475	0.365967	40.2	44.1095
Rainfed	SR_2022	1	1	2	30	12	46.028	525	0.31708	33.8	37.0296
Rainfed	SR_2022	1	1	3	31	136	43.796	450	0.25765	24.88	47.2508
Rainfed	SR_2022	1	1	3	32	126	41.022	425	0.3153	21.36	41.9101
Rainfed	SR_2022	1	1	3	33	144	42.1645	440	0.42645	24.28	37.8913
Rainfed	SR_2022	1	1	3	34	19	48.2455	410	0.28164	26.08	45.2454
Rainfed	SR_2022	1	1	3	35	181	49.8685	400	0.183486	37.68	48.0467
Rainfed	SR_2022	1	1	3	36	83	42.134	425	0.342629	21.08	43.112
Rainfed	SR_2022	1	1	3	37	104	46.4715	300	0.3897	25.16	40.4769
Rainfed	SR_2022	1	1	3	38	116	41.1055	360	0.380857	20.64	49.3411
Rainfed	SR_2022	1	1	3	39	7	38.58	305	0.2732	19.08	47.065
Rainfed	SR_2022	1	1	3	40	37	42.0395	495	0.356743	31.92	35.5388
Rainfed	SR_2022	1	1	3	41	189	38.3355	425	0.2859	22.52	43.5702
Rainfed	SR_2022	1	1	3	42	140	43.575	445	0.363657	26.68	41.7691
Rainfed	SR_2022	1	1	3	43	208	42.1595	380	0.34665	28.88	46.8975
Rainfed	SR_2022	1	1	3	44	135	33.188	425	0.323933	20.72	38.9382
Rainfed	SR_2022	1	1	3	45	146	43.884	315	0.2116	24.84	49.8229
Rainfed	SR_2022	1	1	4	46	96	39.6325	345	0.306333	20.36	52.4558
Rainfed	SR_2022	1	1	4	47	183	30.107	290	0.1854	25.12	46.7038
Rainfed	SR_2022	1	1	4	48	20	41.72	395	0.339933	22.04	42.4864
Rainfed	SR_2022	1	1	4	49	115	39.939	370	0.240867	20.28	44.6746
Rainfed	SR_2022	1	1	4	50	78	47.0975	450	0.3653	23	41.5478
Rainfed	SR_2022	1	1	4	51	145	49.327	375	0.3366	25.16	41.4149
Rainfed	SR_2022	1	1	4	52	43	50.7165	425	0.39005	30.72	40.7812
Rainfed	SR_2022	1	1	4	53	85	46.8815	425	0.3833	28.44	36.526
Rainfed	SR_2022	1	1	4	54	14	46.166	375	0.3934	31.64	43.7927
Rainfed	SR_2022	1	1	4	55	108	50.3055	325	0.357067	28.8	45.2083
Rainfed	SR_2022	1	1	4	56	180	47.788	625	0.3309	30.6	38.6667
Rainfed	SR_2022	1	1	4	57	76	44.525	375	0.369933	30.92	38.8228
Rainfed	SR_2022	1	1	4	58	178	53.203	250	0.2104	26.6	42.1353
Rainfed	SR_2022	1	1	4	59	25	48.26	340	0.282971	31.84	32.2613
Rainfed	SR_2022	1	1	4	60	15	54.6795	245	0.196467	36.04	43.4184
Rainfed	SR_2022	1	1	5	61	127	47.9255	400	0.320914	27.76	39.4092
Rainfed	SR_2022	1	1	5	62	132	43.233	275	0.3391	31.28	32.9284
Rainfed	SR_2022	1	1	5	63	160	42.246	300	0.3544	33	44.5576
Rainfed	SR_2022	1	1	5	64	177	36.999	300	0.2234	24.72	42.8317
Rainfed	SR_2022	1	1	5	65	1	35.6625	275	0.2431	29.8	45.557
Rainfed	SR_2022	1	1	5	66	22	40.613	340	0.2669	38.4	35.2917
Rainfed	SR_2022	1	1	5	67	89	47.2065	460	0.2912	29.04	39.4077
Rainfed	SR_2022	1	1	5	68	223	39.979	275	0.2494	22.92	43.0017
Rainfed	SR_2022	1	1	5	69	166	48.23	290	0.3088	26.44	42.7837
Rainfed	SR_2022	1	1	5	70	120	48.4125	385	0.3288	25.52	40.2978
Rainfed	SR_2022	1	1	5	71	157	48.898	410	0.311067	29	45.4759
Rainfed	SR_2022	1	1	5	72	168	45.6185	395	0.321029	25.28	49.3513
Rainfed	SR_2022	1	1	5	73	90	39.566	290	0.233333	28.88	50.3047
Rainfed	SR_2022	1	1	5	74	13	50.2295	350	0.29955	26.68	44.4978
Rainfed	SR_2022	1	1	5	75	162	56.494	400	0.35075	31.48	44.1296
Rainfed	SR_2022	1	1	6	76	138	42.4255	345	0.368933	26.4	42.6818
Rainfed	SR_2022	1	1	6	77	156	43.106	430	0.29005	26.68	43.6432
Rainfed	SR_2022	1	1	6	78	158	38.578	350	0.3074	32.48	43.6576
Rainfed	SR_2022	1	1	6	79	167	45.089	470	0.33835	28	41.5857
Rainfed	SR_2022	1	1	6	80	82	54.0545	350	0.321591	29.52	47.8862
Rainfed	SR_2022	1	1	6	81	11	30.7655	325	0.293667	24.96	42.0833
Rainfed	SR_2022	1	1	6	82	17	17.853	425	0.25256	8.56	49.0187
Rainfed	SR_2022	1	1	6	83	179	40.88	385	0.3254	27.76	34.2795
Rainfed	SR_2022	1	1	6	84	186	43.9725	305	0.236933	40.08	38.8323
Rainfed	SR_2022	1	1	6	85	55	32.883	365	0.375333	30.44	34.6386
Rainfed	SR_2022	1	1	6	86	51	44.4905	285	0.29968	29.64	36.9096
Rainfed	SR_2022	1	1	6	87	94	38.5835	425	0.25435	24.28	42.5041
Rainfed	SR_2022	1	1	6	88	34	41.557	395	0.348686	24.12	41.6584
Rainfed	SR_2022	1	1	6	89	211	39.233	390	0.320867	30.2	35.1391
Rainfed	SR_2022	1	1	6	90	97	33.94	425	0.3655	30.76	39.922
Rainfed	SR_2022	1	1	7	91	165	38.295	300	0.2436	28.32	41.4689
Rainfed	SR_2022	1	1	7	92	220	43.5725	270	0.3575	27.64	44.4284
Rainfed	SR_2022	1	1	7	93	101	52.9115	400	0.387429	25.88	47.0325
Rainfed	SR_2022	1	1	7	94	195	45.719	375	0.373867	30.64	43.4726
Rainfed	SR_2022	1	1	7	95	98	33.734	385	0.3316	31.88	39.7114
Rainfed	SR_2022	1	1	7	96	87	43.839	415	0.249771	33.84	33.1797
Rainfed	SR_2022	1	1	7	97	99	36.119	315	0.2414	30.92	40.3234
Rainfed	SR_2022	1	1	7	98	214	36.332	455	0.335943	25.64	43.4477
Rainfed	SR_2022	1	1	7	99	206	41.001	335	0.29776	29.68	37.4663
Rainfed	SR_2022	1	1	7	100	21	33.0525	305	0.31136	27.28	32.4487
Rainfed	SR_2022	1	1	7	101	219	38.077	255	0.2076	27.96	43.4907
Rainfed	SR_2022	1	1	7	102	152	48.4135	370	0.348571	28.24	38.6261
Rainfed	SR_2022	1	1	7	103	191	41.191	580	0.3556	32.8	42.5854
Rainfed	SR_2022	1	1	7	104	41	45.398	280	0.33944	31.92	44.5238
Rainfed	SR_2022	1	1	7	105	196	37.868	360	0.289486	30.04	42.2104
Rainfed	SR_2022	1	1	8	106	182	27.775	315	0.28424	19.36	41.2603
Rainfed	SR_2022	1	1	8	107	39	40.9845	245	0.3334	26.92	46.5825
Rainfed	SR_2022	1	1	8	108	204	37.359	350	0.3807	25	38.576
Rainfed	SR_2022	1	1	8	109	210	36.5995	285	0.316	35.24	36.8785
Rainfed	SR_2022	1	1	8	110	205	44.3375	345	0.26115	32.32	42.7228
Rainfed	SR_2022	1	1	8	111	35	51.2805	445	0.35885	30.16	44.8806
Rainfed	SR_2022	1	1	8	112	213	42.539	260	0.216171	30.24	50.1984
Rainfed	SR_2022	1	1	8	113	92	38.493	230	0.2442	35.24	40.227
Rainfed	SR_2022	1	1	8	114	176	33.8305	250	0.36912	23.2	35.2931
Rainfed	SR_2022	1	1	8	115	197	35.617	245	0.2927	27.08	56.2334
Rainfed	SR_2022	1	1	8	116	123	45.2425	285	0.245133	30.68	43.1291
Rainfed	SR_2022	1	1	8	117	114	43.527	255	0.1958	32.64	44.326
Rainfed	SR_2022	1	1	8	118	88	37.7895	245	0.22072	29.72	51.4132
Rainfed	SR_2022	1	1	8	119	33	39.1415	350	0.334333	30.48	42.8871
Rainfed	SR_2022	1	1	8	120	23	43.0925	295	0.318067	32.04	36.3795
Rainfed	SR_2022	1	1	9	121	190	51.217	420	0.37005	24.92	48.6838
Rainfed	SR_2022	1	1	9	122	128	48.3895	365	0.2652	31.8	41.522
Rainfed	SR_2022	1	1	9	123	201	45.0805	350	0.279714	33.08	45.5381
Rainfed	SR_2022	1	1	9	124	74	45.9445	325	0.299333	33.52	46.5274
Rainfed	SR_2022	1	1	9	125	66	47.328	245	0.163733	22.64	51.7314
Rainfed	SR_2022	1	1	9	126	42	43.915	325	0.32888	21.96	40.4189
Rainfed	SR_2022	1	1	9	127	45	42.9915	395	0.353333	26.64	47.7928
Rainfed	SR_2022	1	1	9	128	119	49.676	375	0.3168	37.64	42.678
Rainfed	SR_2022	1	1	9	129	212	38.3715	375	0.34525	32.96	46.5777
Rainfed	SR_2022	1	1	9	130	198	38.3705	355	0.286971	23.8	45.6975
Rainfed	SR_2022	1	1	9	131	163	46.159	310	0.32016	22.52	50.0178
Rainfed	SR_2022	1	1	9	132	86	37.505	260	0.1611	24.84	46.6828
Rainfed	SR_2022	1	1	9	133	193	42.4595	240	0.1706	27.36	46.9737
Rainfed	SR_2022	1	1	9	134	173	46.9635	460	0.3641	26.32	47.7964
Rainfed	SR_2022	1	1	9	135	187	47.649	410	0.31765	27.48	50.1456
Rainfed	SR_2022	1	1	10	136	130	44.9635	350	0.334629	26.96	45.5638
Rainfed	SR_2022	1	1	10	137	58	53.0295	425	0.3458	25.12	50.0478
Rainfed	SR_2022	1	1	10	138	29	45.8805	445	0.32355	28.08	46.8661
Rainfed	SR_2022	1	1	10	139	192	44.9915	400	0.393333	28.44	43.3615
Rainfed	SR_2022	1	1	10	140	200	49.493	395	0.3434	30.28	37.4505
Rainfed	SR_2022	1	1	10	141	56	46.825	350	0.26355	29.2	53.137
Rainfed	SR_2022	1	1	10	142	170	45.235	355	0.39512	26.48	45.7855
Rainfed	SR_2022	1	1	10	143	150	43.1175	375	0.371267	25.76	49.1615
Rainfed	SR_2022	1	1	10	144	137	31.4655	340	0.33608	30.68	35.5932
Rainfed	SR_2022	1	1	10	145	95	36.0735	270	0.19272	26.6	48.6917
Rainfed	SR_2022	1	1	10	146	64	52.885	325	0.329667	24.84	37.4396
Rainfed	SR_2022	1	1	10	147	218	35.3645	375	0.31135	31.44	44.5547
Rainfed	SR_2022	1	1	10	148	169	38.845	425	0.346743	27.2	38.5588
Rainfed	SR_2022	1	1	10	149	133	47.5025	350	0.299067	36.08	33.4701
Rainfed	SR_2022	1	1	10	150	16	34.707	325	0.303429	42.4	38.717
Rainfed	SR_2022	1	1	11	151	105	42.0685	400	0.30175	28.64	36.3408
Rainfed	SR_2022	1	1	11	152	8	32.6335	295	0.286733	25.52	46.489
Rainfed	SR_2022	1	1	11	153	81	36.085	375	0.392	29.72	37.5505
Rainfed	SR_2022	1	1	11	154	69	51.34	345	0.323143	29.96	40.3872
Rainfed	SR_2022	1	1	11	155	175	39.909	305	0.303333	27.92	53.9828
Rainfed	SR_2022	1	1	11	156	142	44.6085	380	0.3078	30.32	40.3826
Rainfed	SR_2022	1	1	11	157	73	48.525	395	0.3752	39.72	36.3343
Rainfed	SR_2022	1	1	11	158	172	38.0615	390	0.3128	33.72	28.8375
Rainfed	SR_2022	1	1	11	159	71	58.13	390	0.33545	34.68	40.9573
Rainfed	SR_2022	1	1	11	160	221	41.319	340	0.309771	30.12	42.7224
Rainfed	SR_2022	1	1	11	161	50	47.3835	300	0.2828	28.08	47.265
Rainfed	SR_2022	1	1	11	162	164	47.2365	325	0.2944	28.8	46.125
Rainfed	SR_2022	1	1	11	163	57	38.8115	425	0.34025	35.76	37.1141
Rainfed	SR_2022	1	1	11	164	174	50.4915	350	0.367257	29.36	41.6349
Rainfed	SR_2022	1	1	11	165	54	44.596	390	0.373771	41.96	39.571
Rainfed	SR_2022	1	1	12	166	113	52.516	375	0.3549	22.04	44.1742
Rainfed	SR_2022	1	1	12	167	103	59.3715	400	0.30444	30.84	47.1077
Rainfed	SR_2022	1	1	12	168	199	43.944	325	0.219086	27.96	43.691
Rainfed	SR_2022	1	1	12	169	61	53.3905	425	0.38008	35.64	48.0247
Rainfed	SR_2022	1	1	12	170	124	33.7375	400	0.33295	29.16	45.487
Rainfed	SR_2022	1	1	12	171	171	38.7665	595	0.366978	36.8	35.6087
Rainfed	SR_2022	1	1	12	172	139	40.581	370	0.347314	29.96	41.1749
Rainfed	SR_2022	1	1	12	173	9	42.2885	350	0.300571	22.32	50.4839
Rainfed	SR_2022	1	1	12	174	207	41.149	375	0.3522	36.08	44.2683
Rainfed	SR_2022	1	1	12	175	24	52.705	420	0.3206	28.32	42.3446
Rainfed	SR_2022	1	1	12	176	46	54.181	305	0.37488	22.32	38.9964
Rainfed	SR_2022	1	1	12	177	155	48.6585	345	0.2702	28.24	46.2323
Rainfed	SR_2022	1	1	12	178	68	38.5095	540	0.387378	24.56	37.5081
Rainfed	SR_2022	1	1	12	179	148	34.4665	375	0.313771	31.84	36.9598
Rainfed	SR_2022	1	1	12	180	32	34.061	330	0.2326	34.84	41.7107
Rainfed	SR_2022	1	1	13	181	147	43.1055	400	0.3056	33.4	34.2874
Rainfed	SR_2022	1	1	13	182	141	38.5155	425	0.2752	18.48	41.1905
Rainfed	SR_2022	1	1	13	183	222	36.291	375	0.2994	23.96	43.2554
Rainfed	SR_2022	1	1	13	184	153	42.236	435	0.2924	36.6	39.6066
Rainfed	SR_2022	1	1	13	185	40	41.297	340	0.356467	30.4	42.7237
Rainfed	SR_2022	1	1	13	186	134	41.571	385	0.306457	24.44	37.2995
Rainfed	SR_2022	1	1	13	187	6	37.802	325	0.258743	30.4	40.4737
Rainfed	SR_2022	1	1	13	188	91	46.0695	270	0.26536	33.8	33.3964
Rainfed	SR_2022	1	1	13	189	216	36.1415	435	0.3018	33.84	38.3806
Rainfed	SR_2022	1	1	13	190	2	43.346	425	0.29255	31.64	42.2377
Rainfed	SR_2022	1	1	13	191	80	47.567	455	0.364044	30.16	39.0318
Rainfed	SR_2022	1	1	13	192	100	55.01	395	0.325143	34.52	44.3801
Rainfed	SR_2022	1	1	13	193	30	36.138	405	0.29545	32.04	42.035
Rainfed	SR_2022	1	1	13	194	161	44.7065	330	0.357667	23.72	42.968
Rainfed	SR_2022	1	1	13	195	143	34.4265	375	0.267943	23.52	36.8027
Rainfed	SR_2022	1	1	14	196	18	33.1065	450	0.356756	33.72	31.8624
Rainfed	SR_2022	1	1	14	197	3	30.7695	475	0.32652	34.08	39.6244
Rainfed	SR_2022	1	1	14	198	77	48.0855	385	0.346867	22.96	34.2857
Rainfed	SR_2022	1	1	14	199	117	45.345	280	0.2252	25.24	37.6387
Rainfed	SR_2022	1	1	14	200	4	41.685	330	0.137829	27.64	42.8075
Rainfed	SR_2022	1	1	14	201	224	46.98	285	0.272133	39.36	34.3293
Rainfed	SR_2022	1	1	14	202	38	46.7465	350	0.249086	33.36	37.5779
Rainfed	SR_2022	1	1	14	203	53	38.556	360	0.2887	33.28	46.1298
Rainfed	SR_2022	1	1	14	204	122	49.7215	375	0.3498	35.44	44.5485
Rainfed	SR_2022	1	1	14	205	154	47.9735	350	0.221543	29.24	48.8372
Rainfed	SR_2022	1	1	14	206	185	42.393	410	0.3309	30.64	41.3577
Rainfed	SR_2022	1	1	14	207	26	45.561	325	0.249657	29.16	44.6228
Rainfed	SR_2022	1	1	14	208	112	44.9215	445	0.329556	28.72	40.7799
Rainfed	SR_2022	1	1	14	209	59	41.9545	380	0.3936	36.2	33.3812
Rainfed	SR_2022	1	1	14	210	107	42.5435	400	0.3425	32.2	40.2112
Rainfed	SR_2022	1	1	15	211	125	45.1785	390	0.368514	19.64	38.8595
Rainfed	SR_2022	1	1	15	212	131	48.771	405	0.3814	31.92	36.5163
Rainfed	SR_2022	1	1	15	213	10	50.1835	415	0.311422	29.96	44.8598
Rainfed	SR_2022	1	1	15	214	149	45.2845	425	0.300171	34.56	38.3796
Rainfed	SR_2022	1	1	15	215	5	53.43	360	0.352629	25.4	42.3465
Rainfed	SR_2022	1	1	15	216	202	44.0715	405	0.28435	32.96	48.0097
Rainfed	SR_2022	1	1	15	217	194	47.37	360	0.352	38.6	38.342
Rainfed	SR_2022	1	1	15	218	118	48.5605	360	0.40815	31.64	43.7168
Rainfed	SR_2022	1	1	15	219	184	48.7755	325	0.358229	26.28	49.9543
Rainfed	SR_2022	1	1	15	220	217	49.2275	340	0.344857	29.44	39.6739
Rainfed	SR_2022	1	1	15	221	159	47.9705	350	0.377	26.8	49.0448
Rainfed	SR_2022	1	1	15	222	75	50.9175	410	0.382	24.56	43.1596
Rainfed	SR_2022	1	1	15	223	62	50.714	495	0.36972	34.32	42.9487
Rainfed	SR_2022	1	1	15	224	225	37.522	325	0.401829	31.48	50.9784
Rainfed	SR_2022	1	1	15	225	28	55.9855	400	0.3236	30.68	39.1004
Rainfed	SR_2022	1	2	1	226	113	53.169	470	0.371257	24.72	45.9709
Rainfed	SR_2022	1	2	1	227	204	44.9825	480	0.34295	33.6	36.9762
Rainfed	SR_2022	1	2	1	228	138	47.5245	410	0.3079	36.4	42.7582
Rainfed	SR_2022	1	2	1	229	122	55.7185	425	0.398756	34.52	45.9444
Rainfed	SR_2022	1	2	1	230	43	53.3515	400	0.3311	35.2	40.6932
Rainfed	SR_2022	1	2	1	231	189	51.682	425	0.32895	28.72	45.7521
Rainfed	SR_2022	1	2	1	232	136	33.7555	415	0.355314	23	39.8783
Rainfed	SR_2022	1	2	1	233	45	51.911	340	0.232	24.32	45.4276
Rainfed	SR_2022	1	2	1	234	119	58.6285	385	0.31795	35.12	38.7016
Rainfed	SR_2022	1	2	1	235	89	47.103	385	0.291556	36.48	39.9781
Rainfed	SR_2022	1	2	1	236	202	41.1215	360	0.334686	28.24	40.8782
Rainfed	SR_2022	1	2	1	237	199	54.4315	440	0.35125	21.48	43.5382
Rainfed	SR_2022	1	2	1	238	124	45.498	250	0.232286	28.08	41.7521
Rainfed	SR_2022	1	2	1	239	139	47.977	490	0.32396	32.8	40.9146
Rainfed	SR_2022	1	2	1	240	44	40.2795	300	0.222467	26.48	41.1178
Rainfed	SR_2022	1	2	2	241	223	47.7935	450	0.35855	30.84	44.3061
Rainfed	SR_2022	1	2	2	242	82	56.247	330	0.232514	31.08	44.0798
Rainfed	SR_2022	1	2	2	243	56	51.1575	415	0.4503	29.08	45.5158
Rainfed	SR_2022	1	2	2	244	193	39.323	310	0.3158	27.4	42.4672
Rainfed	SR_2022	1	2	2	245	198	41.565	355	0.325029	25.16	46.7727
Rainfed	SR_2022	1	2	2	246	111	47.268	495	0.3196	35.84	31.7522
Rainfed	SR_2022	1	2	2	247	210	35.3145	380	0.30698	27.04	48.8314
Rainfed	SR_2022	1	2	2	248	95	39.944	315	0.316667	29.76	42.1774
Rainfed	SR_2022	1	2	2	249	77	54.3475	330	0.2944	34.44	32.6016
Rainfed	SR_2022	1	2	2	250	147	56.565	415	0.34415	34.52	37.6246
Rainfed	SR_2022	1	2	2	251	14	51.7795	340	0.315086	25.2	64.2063
Rainfed	SR_2022	1	2	2	252	154	42.4945	275	0.202057	30.44	38.8042
Rainfed	SR_2022	1	2	2	253	215	38.6015	280	0.3184	30.44	42.3522
Rainfed	SR_2022	1	2	2	254	105	39.725	390	0.3886	32.52	39.0898
Rainfed	SR_2022	1	2	2	255	219	32.814	340	0.252	25.08	43.3493
Rainfed	SR_2022	1	2	3	256	16	37.9475	310	0.269771	42.56	34.5301
Rainfed	SR_2022	1	2	3	257	127	44.573	345	0.230629	25.36	41.1672
Rainfed	SR_2022	1	2	3	258	53	35.369	310	0.3054	28.44	44.4023
Rainfed	SR_2022	1	2	3	259	64	46.041	375	0.357	26.04	34.2089
Rainfed	SR_2022	1	2	3	260	224	42.048	285	0.268333	29.96	47.6769
Rainfed	SR_2022	1	2	3	261	205	41.5345	335	0.318914	36.36	38.3718
Rainfed	SR_2022	1	2	3	262	168	34.4735	350	0.233029	26.6	43.1429
Rainfed	SR_2022	1	2	3	263	79	50.1175	325	0.369714	33.92	44.3986
Rainfed	SR_2022	1	2	3	264	171	41.311	385	0.319143	28.12	36.0882
Rainfed	SR_2022	1	2	3	265	200	48.561	410	0.326222	30.84	36.083
Rainfed	SR_2022	1	2	3	266	188	39.751	335	0.3276	37.84	41.7548
Rainfed	SR_2022	1	2	3	267	173	42.5955	355	0.3656	22.76	47.5747
Rainfed	SR_2022	1	2	3	268	169	39.4985	455	0.3435	38.76	37.4303
Rainfed	SR_2022	1	2	3	269	158	43.856	250	0.347	27.36	40.0877
Rainfed	SR_2022	1	2	3	270	132	37.73	365	0.3562	33.04	31.6828
Rainfed	SR_2022	1	2	4	271	48	41.2885	350	0.376067	30.32	38.7335
Rainfed	SR_2022	1	2	4	272	32	40.0985	280	0.31016	26.52	42.5339
Rainfed	SR_2022	1	2	4	273	21	46.1825	365	0.329644	49.92	35.641
Rainfed	SR_2022	1	2	4	274	217	45.5265	355	0.399333	37.8	42.9947
Rainfed	SR_2022	1	2	4	275	151	53.174	375	0.363	22.08	43.5326
Rainfed	SR_2022	1	2	4	276	222	31.2355	225	0.2563	27.32	42.5769
Rainfed	SR_2022	1	2	4	277	72	42.3735	305	0.342067	30.16	41.3263
Rainfed	SR_2022	1	2	4	278	40	33.143	290	0.26768	30.12	39.0438
Rainfed	SR_2022	1	2	4	279	67	38.5645	340	0.26545	31.52	48.4772
Rainfed	SR_2022	1	2	4	280	146	39.294	300	0.289829	21.72	46.3352
Rainfed	SR_2022	1	2	4	281	57	33.939	405	0.350629	30.08	36.4628
Rainfed	SR_2022	1	2	4	282	4	35.125	235	0.245467	36.52	39.08
Rainfed	SR_2022	1	2	4	283	59	30.66	290	0.2708	40.4	34.0099
Rainfed	SR_2022	1	2	4	284	184	40.533	325	0.2764	23.92	45.6355
Rainfed	SR_2022	1	2	4	285	35	45.799	310	0.249133	27.2	42.0735
Rainfed	SR_2022	1	2	5	286	34	40.5485	320	0.282267	25.28	37.3892
Rainfed	SR_2022	1	2	5	287	94	40.9225	315	0.308533	22.16	40.0181
Rainfed	SR_2022	1	2	5	288	33	36.6865	465	0.386286	29.88	34.9799
Rainfed	SR_2022	1	2	5	289	61	42.2175	350	0.352	26.4	42.0455
Rainfed	SR_2022	1	2	5	290	185	42.3675	330	0.306343	27.92	41.1748
Rainfed	SR_2022	1	2	5	291	13	36.7025	295	0.2252	25.2	42.1111
Rainfed	SR_2022	1	2	5	292	12	39.988	400	0.52848	31.96	35.9199
Rainfed	SR_2022	1	2	5	293	207	41.3715	325	0.3368	32.04	41.8102
Rainfed	SR_2022	1	2	5	294	19	41.224	350	0.321543	26.92	49.3462
Rainfed	SR_2022	1	2	5	295	11	28.5535	345	0.290267	21.76	41.4154
Rainfed	SR_2022	1	2	5	296	177	41.8715	350	0.35928	24.84	44.3156
Rainfed	SR_2022	1	2	5	297	9	38.6085	275	0.213267	28.92	41.7427
Rainfed	SR_2022	1	2	5	298	71	43.3335	490	0.340578	32.52	36.9496
Rainfed	SR_2022	1	2	5	299	30	33.782	335	0.2984	24.84	41.6747
Rainfed	SR_2022	1	2	5	300	66	43.668	340	0.2389	28.08	43.5613
Rainfed	SR_2022	1	2	6	301	128	44.315	350	0.397733	26.92	39.584
Rainfed	SR_2022	1	2	6	302	62	33.832	395	0.356629	26.36	44.3551
Rainfed	SR_2022	1	2	6	303	81	33.5035	400	0.3274	35.36	39.129
Rainfed	SR_2022	1	2	6	304	5	38.872	390	0.317533	22.52	44.0675
Rainfed	SR_2022	1	2	6	305	93	26.0865	340	0.295067	25.64	42.8549
Rainfed	SR_2022	1	2	6	306	141	38.7035	300	0.32	33.48	43.0944
Rainfed	SR_2022	1	2	6	307	39	39.0645	350	0.301429	31.2	43
Rainfed	SR_2022	1	2	6	308	144	39.667	460	0.4246	32.2	41.5155
Rainfed	SR_2022	1	2	6	309	70	38.3395	490	0.32835	35.4	40.8136
Rainfed	SR_2022	1	2	6	310	206	33.68	410	0.2854	34.12	36.9519
Rainfed	SR_2022	1	2	6	311	209	42.91	265	0.32944	28.72	41.8106
Rainfed	SR_2022	1	2	6	312	74	47.0475	495	0.44292	27.96	43.2332
Rainfed	SR_2022	1	2	6	313	49	34.311	485	0.419829	27.12	33.5546
Rainfed	SR_2022	1	2	6	314	47	38.309	465	0.32516	35.2	45.3295
Rainfed	SR_2022	1	2	6	315	27	41.553	435	0.4546	21.32	52.2889
Rainfed	SR_2022	1	2	7	316	108	51.77	405	0.42345	28.32	43.3757
Rainfed	SR_2022	1	2	7	317	221	48.108	415	0.218764	28.04	45.6491
Rainfed	SR_2022	1	2	7	318	176	43.616	400	0.298067	28.56	45.6723
Rainfed	SR_2022	1	2	7	319	65	53.7805	455	0.28545	31.64	42.3767
Rainfed	SR_2022	1	2	7	320	167	48.292	470	0.43565	32.52	41.4637
Rainfed	SR_2022	1	2	7	321	102	36.388	480	0.365029	27.4	42.1606
Rainfed	SR_2022	1	2	7	322	22	40.5375	535	0.381378	34.6	34.6127
Rainfed	SR_2022	1	2	7	323	69	45.1755	365	0.372667	29.96	36.8625
Rainfed	SR_2022	1	2	7	324	51	40.393	455	0.3599	29.76	41.5054
Rainfed	SR_2022	1	2	7	325	24	45.1535	425	0.37775	29.44	44.1848
Rainfed	SR_2022	1	2	7	326	26	41.2535	375	0.267867	23.68	42.0439
Rainfed	SR_2022	1	2	7	327	15	46.086	390	0.35805	27.96	43.0758
Rainfed	SR_2022	1	2	7	328	114	44.372	350	0.337086	31.88	41.9699
Rainfed	SR_2022	1	2	7	329	163	38.3945	275	0.28264	27.48	47.3945
Rainfed	SR_2022	1	2	7	330	100	52.3825	430	0.4035	24.96	43.1891
Rainfed	SR_2022	1	2	8	331	84	46.5335	340	0.306686	32.48	45.5665
Rainfed	SR_2022	1	2	8	332	149	48.0005	375	0.375486	31.32	37.4202
Rainfed	SR_2022	1	2	8	333	80	44.5415	380	0.329267	25.68	41.1838
Rainfed	SR_2022	1	2	8	334	174	50.5395	410	0.33435	35.12	38.6333
Rainfed	SR_2022	1	2	8	335	160	47.5085	410	0.38795	31.32	41.6092
Rainfed	SR_2022	1	2	8	336	121	47.68	340	0.279	31.8	33.6478
Rainfed	SR_2022	1	2	8	337	37	36.391	375	0.3248	27.96	34.4778
Rainfed	SR_2022	1	2	8	338	145	42.15	325	0.209714	25.16	41.8124
Rainfed	SR_2022	1	2	8	339	225	31.075	300	0.309467	26.04	46.2058
Rainfed	SR_2022	1	2	8	340	153	44.391	425	0.357543	25.28	39.9525
Rainfed	SR_2022	1	2	8	341	214	46.7685	350	0.30512	27	40.3407
Rainfed	SR_2022	1	2	8	342	208	48.7555	380	0.343714	27.24	43.9941
Rainfed	SR_2022	1	2	8	343	2	48.0525	375	0.3344	31.28	43.6957
Rainfed	SR_2022	1	2	8	344	23	35.9215	350	0.3296	23.64	37.6142
Rainfed	SR_2022	1	2	8	345	88	35.429	325	0.404667	24.52	45.4812
Rainfed	SR_2022	1	2	9	346	181	43.3565	340	0.3609	30.88	45.272
Rainfed	SR_2022	1	2	9	347	157	43.308	325	0.30605	30.28	46.1691
Rainfed	SR_2022	1	2	9	348	156	38.172	480	0.349733	27.64	43.0535
Rainfed	SR_2022	1	2	9	349	38	37.21	515	0.39165	27.88	37.1162
Rainfed	SR_2022	1	2	9	350	166	48.809	225	0.2036	23.64	43.6887
Rainfed	SR_2022	1	2	9	351	190	49.5935	465	0.38044	30.96	47.4935
Rainfed	SR_2022	1	2	9	352	112	41.9715	360	0.354933	29.36	42.4932
Rainfed	SR_2022	1	2	9	353	123	43.394	325	0.353371	34.4	41.907
Rainfed	SR_2022	1	2	9	354	55	30.467	350	0.321933	33.16	37.4548
Rainfed	SR_2022	1	2	9	355	161	40.687	350	0.325133	30.28	39.5905
Rainfed	SR_2022	1	2	9	356	180	48.959	380	0.41416	31.72	40.8701
Rainfed	SR_2022	1	2	9	357	96	39.6815	360	0.38648	24.44	49.6236
Rainfed	SR_2022	1	2	9	358	162	47.188	360	0.56	34.76	45.2934
Rainfed	SR_2022	1	2	9	359	118	47.1625	295	0.269867	35.68	42.343
Rainfed	SR_2022	1	2	9	360	213	51.104	325	0.301455	35.32	47.9502
Rainfed	SR_2022	1	2	10	361	10	47.045	435	0.389257	24.76	44.8788
Rainfed	SR_2022	1	2	10	362	131	44.9535	390	0.34895	32.32	36.2376
Rainfed	SR_2022	1	2	10	363	106	48.3485	475	0.35655	35.2	40.5227
Rainfed	SR_2022	1	2	10	364	150	38.4825	325	0.2676	24.48	50.9804
Rainfed	SR_2022	1	2	10	365	36	50.106	375	0.401257	24.72	43.5275
Rainfed	SR_2022	1	2	10	366	197	44.443	400	0.3652	32.12	50.8344
Rainfed	SR_2022	1	2	10	367	101	58.813	400	0.345257	31.2	45.9487
Rainfed	SR_2022	1	2	10	368	172	43.6665	540	0.407378	46.12	31.804
Rainfed	SR_2022	1	2	10	369	164	46.281	290	0.280133	28.2	47.6596
Rainfed	SR_2022	1	2	10	370	75	42.8635	330	0.3065	23.92	44.5151
Rainfed	SR_2022	1	2	10	371	41	43.152	355	0.363933	27.16	41.8999
Rainfed	SR_2022	1	2	10	372	212	34.2295	360	0.349956	31.12	46.0797
Rainfed	SR_2022	1	2	10	373	116	38.143	355	0.3976	25.6	44.0938
Rainfed	SR_2022	1	2	10	374	134	44.2565	425	0.416533	27.8	38
Rainfed	SR_2022	1	2	10	375	211	48.9395	395	0.4202	34.44	35.7259
Rainfed	SR_2022	1	2	11	376	6	39.779	360	0.391067	25.84	41.6718
Rainfed	SR_2022	1	2	11	377	99	42.1365	375	0.337267	31.32	41.0473
Rainfed	SR_2022	1	2	11	378	73	38.861	380	0.36375	42.48	37.1657
Rainfed	SR_2022	1	2	11	379	103	35.75	500	0.358145	26.2	48.1069
Rainfed	SR_2022	1	2	11	380	97	36.093	310	0.256467	31.76	35.7557
Rainfed	SR_2022	1	2	11	381	85	42.16	300	0.39096	30.36	38.643
Rainfed	SR_2022	1	2	11	382	25	33.7475	365	0.36496	36	32.5889
Rainfed	SR_2022	1	2	11	383	178	43.475	345	0.4234	25.28	41.1234
Rainfed	SR_2022	1	2	11	384	18	39.9655	250	0.3409	35.4	34.1469
Rainfed	SR_2022	1	2	11	385	201	42.8605	350	0.374533	34.96	41.2243
Rainfed	SR_2022	1	2	11	386	17	16.155	295	0.150267	14.08	44.2045
Rainfed	SR_2022	1	2	11	387	159	37.2115	340	0.380933	29.56	43.4235
Rainfed	SR_2022	1	2	11	388	195	37.334	360	0.379333	25.84	39.9071
Rainfed	SR_2022	1	2	11	389	175	41.1465	395	0.321943	30.84	40.9728
Rainfed	SR_2022	1	2	11	390	110	45.763	340	0.318686	36.32	43.4912
Rainfed	SR_2022	1	2	12	391	148	43.4425	360	0.476933	29.44	37.106
Rainfed	SR_2022	1	2	12	392	87	43.785	475	0.401771	23.52	34.6769
Rainfed	SR_2022	1	2	12	393	191	35.3045	330	0.33648	31.4	36.9809
Rainfed	SR_2022	1	2	12	394	182	26.1165	390	0.330914	25.64	45.897
Rainfed	SR_2022	1	2	12	395	58	37.997	350	0.3392	26.04	46.9739
Rainfed	SR_2022	1	2	12	396	76	37.0785	475	0.394	30.56	36.3482
Rainfed	SR_2022	1	2	12	397	91	42.075	320	0.35176	35.44	36.7156
Rainfed	SR_2022	1	2	12	398	54	36.792	315	0.34856	30.8	41.9091
Rainfed	SR_2022	1	2	12	399	137	26.0575	410	0.398514	28.92	36.5284
Rainfed	SR_2022	1	2	12	400	60	43.141	400	0.29915	22.48	49.8043
Rainfed	SR_2022	1	2	12	401	165	37.3215	405	0.3386	27.68	37.052
Rainfed	SR_2022	1	2	12	402	86	35.057	230	0.2196	22.08	43.8043
Rainfed	SR_2022	1	2	12	403	130	33.4305	285	0.18008	29.4	42.3129
Rainfed	SR_2022	1	2	12	404	192	34.6135	340	0.2064	34.44	41.8002
Rainfed	SR_2022	1	2	12	405	186	26.5395	375	0.305667	30.84	32.3476
Rainfed	SR_2022	1	2	13	406	50	36.2365	360	0.47192	29.4	41.8231
Rainfed	SR_2022	1	2	13	407	7	41.4415	295	0.2828	29.44	42.6766
Rainfed	SR_2022	1	2	13	408	187	36.974	310	0.222222	28.96	47.6243
Rainfed	SR_2022	1	2	13	409	28	40.1475	330	0.23655	31.28	39.1816
Rainfed	SR_2022	1	2	13	410	203	42.948	275	0.1972	55.44	21.2987
Rainfed	SR_2022	1	2	13	411	170	43.115	295	0.1601	36.08	44.6563
Rainfed	SR_2022	1	2	13	412	216	37.74	410	0.32907	28.16	40.0568
Rainfed	SR_2022	1	2	13	413	125	33.1595	300	0.2916	29.24	36.58
Rainfed	SR_2022	1	2	13	414	78	41.036	360	0.23565	28.04	40.7846
Rainfed	SR_2022	1	2	13	415	126	30.654	330	0.29328	21.96	39.0164
Rainfed	SR_2022	1	2	13	416	29	37.4345	330	0.3751	25.96	40.339
Rainfed	SR_2022	1	2	13	417	8	34.0365	355	0.30395	29.48	40.6242
Rainfed	SR_2022	1	2	13	418	194	38.581	325	0.234629	33.36	36.6427
Rainfed	SR_2022	1	2	13	419	120	41.452	345	0.291886	30.76	42.8609
Rainfed	SR_2022	1	2	13	420	31	44.1655	400	0.32355	27.84	41.092
Rainfed	SR_2022	1	2	14	421	115	42.462	420	0.3636	28.2	43.4184
Rainfed	SR_2022	1	2	14	422	63	33.711	490	0.4382	33.12	34.4082
Rainfed	SR_2022	1	2	14	423	117	43.361	300	0.325543	29.6	40.8784
Rainfed	SR_2022	1	2	14	424	155	48.032	420	0.321714	27.64	42.4602
Rainfed	SR_2022	1	2	14	425	133	32.6755	450	0.26235	28.2	29.844
Rainfed	SR_2022	1	2	14	426	107	42.811	325	0.299667	29.92	41.8048
Rainfed	SR_2022	1	2	14	427	1	36.9105	250	0.3695	24.08	43.6213
Rainfed	SR_2022	1	2	14	428	129	35.495	355	0.359	29.64	41.9028
Rainfed	SR_2022	1	2	14	429	143	36.104	450	0.310356	27.28	39.956
Rainfed	SR_2022	1	2	14	430	90	28.973	360	0.293333	26.76	45.5306
Rainfed	SR_2022	1	2	14	431	98	28.489	380	0.35272	27	38.0593
Rainfed	SR_2022	1	2	14	432	142	33.916	350	0.5101	18.68	37.0664
Rainfed	SR_2022	1	2	14	433	46	42.454	295	0.33192	23.96	37.7129
Rainfed	SR_2022	1	2	14	434	3	39.4815	425	0.4058	25.24	37.6545
Rainfed	SR_2022	1	2	14	435	196	38.989	325	0.310743	29.48	41.2483
Rainfed	SR_2022	1	2	15	436	42	38.0735	375	0.323667	18.84	38.0467
Rainfed	SR_2022	1	2	15	437	135	37.111	430	0.361943	26.96	35.4303
Rainfed	SR_2022	1	2	15	438	152	46.98	425	0.410667	26.72	34.4311
Rainfed	SR_2022	1	2	15	439	20	35.3075	415	0.317	25.4	43.7008
Rainfed	SR_2022	1	2	15	440	140	41.508	400	0.329314	27.6	39.8986
Rainfed	SR_2022	1	2	15	441	52	37.7995	375	0.348467	31.44	36.5394
Rainfed	SR_2022	1	2	15	442	109	36.1835	320	0.32528	23.6	39
Rainfed	SR_2022	1	2	15	443	220	41.4285	400	0.3372	27.56	42.9028
Rainfed	SR_2022	1	2	15	444	68	39.379	395	0.290067	27	35.6593
Rainfed	SR_2022	1	2	15	445	179	42.179	465	0.363371	24.36	32.8243
Rainfed	SR_2022	1	2	15	446	183	28.2915	245	0.1165	20.2	44.6139
Rainfed	SR_2022	1	2	15	447	104	32.1505	300	0.197429	31.08	36.6281
Rainfed	SR_2022	1	2	15	448	83	33.2225	395	0.336267	22.84	42.049
Rainfed	SR_2022	1	2	15	449	218	26.5635	330	0.313314	29.48	42.6594
Rainfed	SR_2022	1	2	15	450	92	33.1355	265	0.292	31.4	36.3185
Rainfed	SR_2023	2	1	1	1	36	54.0815	300	0.238867	29.56	52.5034
Rainfed	SR_2023	2	1	1	2	215	53.4945	225	0.27952	28	47.0714
Rainfed	SR_2023	2	1	1	3	49	61.888	350	0.301956	36.6	43.5191
Rainfed	SR_2023	2	1	1	4	102	61.414	350	0.264873	34.76	46.5362
Rainfed	SR_2023	2	1	1	5	151	48.93	250	0.232267	29.36	52.8065
Rainfed	SR_2023	2	1	1	6	65	70.2685	435	0.1422	26	40.4154
Rainfed	SR_2023	2	1	1	7	72	59.736	290	0.3124	30.88	46.4508
Rainfed	SR_2023	2	1	1	8	93	66.7785	250	0.13	33.4	51.5808
Rainfed	SR_2023	2	1	1	9	52	72.2675	415	0.26585	38.16	44.2138
Rainfed	SR_2023	2	1	1	10	209	61.869	375	0.2852	27.6	49.5797
Rainfed	SR_2023	2	1	1	11	109	56.1295	300	0.30568	28.72	46.4903
Rainfed	SR_2023	2	1	1	12	48	69.2485	400	0.3178	24.4	45.1148
Rainfed	SR_2023	2	1	1	13	111	50.768	250	0.2176	27.12	52.0354
Rainfed	SR_2023	2	1	1	14	47	70.8895	400	0.313418	31.8	42.2642
Rainfed	SR_2023	2	1	1	15	188	71.838	375	0.2666	40.28	50.427
Rainfed	SR_2023	2	1	2	16	31	60.011	300	0.230743	25.92	44.5062
Rainfed	SR_2023	2	1	2	17	70	72.9595	360	0.285822	33	53.1879
Rainfed	SR_2023	2	1	2	18	44	83.044	410	0.38165	29.76	51.8145
Rainfed	SR_2023	2	1	2	19	110	88.7215	300	0.273467	38.64	53.7267
Rainfed	SR_2023	2	1	2	20	106	101.285	440	0.388277	38.6	50.2694
Rainfed	SR_2023	2	1	2	21	121	89.0455	470	0.323169	35.36	51.9005
Rainfed	SR_2023	2	1	2	22	67	79.932	400	0.363133	31.12	61.3111
Rainfed	SR_2023	2	1	2	23	63	105.376	410	0.315231	42.92	45.7223
Rainfed	SR_2023	2	1	2	24	84	98.699	425	0.332033	35.92	57.2049
Rainfed	SR_2023	2	1	2	25	27	90.393	500	0.2988	23.76	64.4444
Rainfed	SR_2023	2	1	2	26	60	94.6245	380	0.344267	27.16	48.6451
Rainfed	SR_2023	2	1	2	27	129	91.2435	475	0.390833	34.88	43.1422
Rainfed	SR_2023	2	1	2	28	203	85.24	415	0.2913	29.36	46.8801
Rainfed	SR_2023	2	1	2	29	79	88.207	350	0.349911	42.16	48.7761
Rainfed	SR_2023	2	1	2	30	12	79.68	400	0.3472	41.16	45.792
Rainfed	SR_2023	2	1	3	31	136	71.3095	375	0.33985	27.16	47.4521
Rainfed	SR_2023	2	1	3	32	126	62.7035	430	0.2696	26.36	50.7587
Rainfed	SR_2023	2	1	3	33	144	79.1125	400	0.281933	44.64	46.2993
Rainfed	SR_2023	2	1	3	34	19	73.9705	455	0.297567	30.08	48.0585
Rainfed	SR_2023	2	1	3	35	181	67.119	325	0.33728	41.44	51.2162
Rainfed	SR_2023	2	1	3	36	83	74.0875	400	0.238873	25.36	47.4132
Rainfed	SR_2023	2	1	3	37	104	75.0535	350	0.3754	41.44	39.5656
Rainfed	SR_2023	2	1	3	38	116	62.3365	370	0.29885	29.12	45.2747
Rainfed	SR_2023	2	1	3	39	7	54.0065	390	0.315733	27.72	50.6349
Rainfed	SR_2023	2	1	3	40	37	60.184	350	0.30905	39.64	40.2321
Rainfed	SR_2023	2	1	3	41	189	63.863	540	0.299667	29.72	48.9367
Rainfed	SR_2023	2	1	3	42	140	58.6415	250	0.231533	24.76	45.3958
Rainfed	SR_2023	2	1	3	43	208	66.0955	310	0.283429	30.68	53.8592
Rainfed	SR_2023	2	1	3	44	135	55.5985	425	0.337491	31.4	43.5159
Rainfed	SR_2023	2	1	3	45	146	51.683	425	0.2584	27.96	49.6137
Rainfed	SR_2023	2	1	4	46	96	48.155	325	0.272286	25.96	51.5408
Rainfed	SR_2023	2	1	4	47	183	52.665	300	0.273371	30.6	54.1961
Rainfed	SR_2023	2	1	4	48	20	52.391	350	0.340857	22.24	45.2698
Rainfed	SR_2023	2	1	4	49	115	49.208	375	0.286743	29.6	47.2703
Rainfed	SR_2023	2	1	4	50	78	61.8045	350	0.3382	34	45.2353
Rainfed	SR_2023	2	1	4	51	145	55.0545	265	0.3848	34.8	44.8161
Rainfed	SR_2023	2	1	4	52	43	59.211	390	0.30032	29.16	45.4595
Rainfed	SR_2023	2	1	4	53	85	70.1275	450	0.38232	39.64	42.3512
Rainfed	SR_2023	2	1	4	54	14	65.145	365	0.320857	27.04	45.4882
Rainfed	SR_2023	2	1	4	55	108	67.581	375	0.255636	28.6	52.1958
Rainfed	SR_2023	2	1	4	56	180	66.1065	385	0.4266	29.68	45.566
Rainfed	SR_2023	2	1	4	57	76	58.3475	265	0.357333	19.12	46.7573
Rainfed	SR_2023	2	1	4	58	178	72.4385	450	0.3096	28.52	48.2048
Rainfed	SR_2023	2	1	4	59	25	66.031	400	0.3747	30.12	36.7596
Rainfed	SR_2023	2	1	4	60	15	61.9725	300	0.366133	33.52	45.9785
Rainfed	SR_2023	2	1	5	61	127	56.6365	225	0.2607	32.44	45.2035
Rainfed	SR_2023	2	1	5	62	132	72.069	310	0.3699	43.88	36.8277
Rainfed	SR_2023	2	1	5	63	160	69.148	400	0.39275	30.56	42.4215
Rainfed	SR_2023	2	1	5	64	177	66.9745	325	0.3788	27.72	49.2641
Rainfed	SR_2023	2	1	5	65	1	70.5555	375	0.444444	35.16	44.4937
Rainfed	SR_2023	2	1	5	66	22	74.444	325	0.259422	45.04	38.6412
Rainfed	SR_2023	2	1	5	67	89	71.5735	315	0.40104	34.2	42.5029
Rainfed	SR_2023	2	1	5	68	223	68.87	450	0.416178	21.96	48.7432
Rainfed	SR_2023	2	1	5	69	166	76.851	500	0.348067	30.92	47.348
Rainfed	SR_2023	2	1	5	70	120	70.1225	340	0.3171	31.72	46.6961
Rainfed	SR_2023	2	1	5	71	157	77.3785	400	0.395244	28.08	47.9202
Rainfed	SR_2023	2	1	5	72	168	82.2395	560	0.364367	26.68	45.6972
Rainfed	SR_2023	2	1	5	73	90	74.9655	300	0.2022	33.92	51.7335
Rainfed	SR_2023	2	1	5	74	13	81.425	440	0.33312	28.76	50.3755
Rainfed	SR_2023	2	1	5	75	162	86.6475	475	0.4185	33.68	46.7933
Rainfed	SR_2023	2	1	6	76	138	87.6115	450	0.41688	34.76	47.1922
Rainfed	SR_2023	2	1	6	77	156	65.9605	475	0.3944	26.08	46.9479
Rainfed	SR_2023	2	1	6	78	158	71.1945	510	0.3996	35	44.5714
Rainfed	SR_2023	2	1	6	79	167	83.1255	425	0.414489	30.08	45.5452
Rainfed	SR_2023	2	1	6	80	82	70.956	310	0.383314	33.88	49.634
Rainfed	SR_2023	2	1	6	81	11	62.394	260	0.252667	34.92	49.2325
Rainfed	SR_2023	2	1	6	82	17	44.131	325	0.302114	27.28	50.9531
Rainfed	SR_2023	2	1	6	83	179	61.388	310	0.377533	33.44	42.0215
Rainfed	SR_2023	2	1	6	84	186	66.1845	300	0.32712	43.56	40.2204
Rainfed	SR_2023	2	1	6	85	55	66.7105	410	0.29432	37.96	41.7597
Rainfed	SR_2023	2	1	6	86	51	76.2855	375	0.380356	37.88	41.32
Rainfed	SR_2023	2	1	6	87	94	65.362	375	0.370171	35.16	46.0296
Rainfed	SR_2023	2	1	6	88	34	65.997	410	0.327511	28.8	44.7917
Rainfed	SR_2023	2	1	6	89	211	71.4125	525	0.304985	28.92	38.9073
Rainfed	SR_2023	2	1	6	90	97	77.131	410	0.309927	34.52	49.1194
Rainfed	SR_2023	2	1	7	91	165	72.4525	350	0.416178	33.64	44.4828
Rainfed	SR_2023	2	1	7	92	220	76.643	415	0.464089	29.64	54.5749
Rainfed	SR_2023	2	1	7	93	101	74.3445	400	0.230618	27.52	48.6483
Rainfed	SR_2023	2	1	7	94	195	77.0825	300	0.395244	41.4	42.2415
Rainfed	SR_2023	2	1	7	95	98	74.0015	395	0.397491	39.24	43.5474
Rainfed	SR_2023	2	1	7	96	87	79.128	445	0.16176	38.04	41.1356
Rainfed	SR_2023	2	1	7	97	99	70.1875	450	0.4164	33.68	44.5012
Rainfed	SR_2023	2	1	7	98	214	72.175	500	0.4185	31.4	48.3439
Rainfed	SR_2023	2	1	7	99	206	69.886	525	0.320677	37.44	38.9957
Rainfed	SR_2023	2	1	7	100	21	63.72	365	0.358545	35.44	42.6637
Rainfed	SR_2023	2	1	7	101	219	51.382	285	0.87912	28.04	46.719
Rainfed	SR_2023	2	1	7	102	152	68.3555	330	0.4663	36.4	42.6923
Rainfed	SR_2023	2	1	7	103	191	65.9915	360	0.2236	30.12	54.1169
Rainfed	SR_2023	2	1	7	104	41	56.5325	425	0.137818	25.4	48.4252
Rainfed	SR_2023	2	1	7	105	196	72.2145	250	0.5287	31.72	44.6658
Rainfed	SR_2023	2	1	8	106	182	61.7055	425	0.28315	37.8	41.7778
Rainfed	SR_2023	2	1	8	107	39	69.2435	340	0.20445	34.2	53.7778
Rainfed	SR_2023	2	1	8	108	204	78.6435	410	0.267564	25.64	48.8144
Rainfed	SR_2023	2	1	8	109	210	71.198	350	0.4279	38.28	44.2842
Rainfed	SR_2023	2	1	8	110	205	84.097	360	0.235564	39.24	46.0347
Rainfed	SR_2023	2	1	8	111	35	77.2845	475	0.267964	39.36	44.7154
Rainfed	SR_2023	2	1	8	112	213	67.144	375	0.360436	23.4	54.2906
Rainfed	SR_2023	2	1	8	113	92	63.3755	340	0.3788	34.04	39.1069
Rainfed	SR_2023	2	1	8	114	176	66.9975	475	0.326356	35.44	46.8623
Rainfed	SR_2023	2	1	8	115	197	74.079	405	0.402	14.68	54.8501
Rainfed	SR_2023	2	1	8	116	123	67.279	250	0.59008	34.08	44.3897
Rainfed	SR_2023	2	1	8	117	114	71.294	450	0.194133	32.6	44.9571
Rainfed	SR_2023	2	1	8	118	88	69.083	275	0.4259	35.64	43.1874
Rainfed	SR_2023	2	1	8	119	33	75.652	425	0.33472	25.56	39.687
Rainfed	SR_2023	2	1	8	120	23	64.692	410	0.370182	36.56	42.7133
Rainfed	SR_2023	2	1	9	121	190	67.6415	350	0.276057	29.6	52.0541
Rainfed	SR_2023	2	1	9	122	128	65.343	375	0.237236	28	45.1714
Rainfed	SR_2023	2	1	9	123	201	74.823	410	0.2957	39.44	47.4138
Rainfed	SR_2023	2	1	9	124	74	65.979	325	0.256933	36.68	47.7317
Rainfed	SR_2023	2	1	9	125	66	82.963	425	0.321567	36.8	41.0761
Rainfed	SR_2023	2	1	9	126	42	75.7175	510	0.4316	33.04	47.7603
Rainfed	SR_2023	2	1	9	127	45	74.761	400	0.371	29.48	50.2307
Rainfed	SR_2023	2	1	9	128	119	65.872	405	0.27328	32.2	46.1118
Rainfed	SR_2023	2	1	9	129	212	61.646	410	0.2808	28.96	54.8343
Rainfed	SR_2023	2	1	9	130	198	64.4195	450	0.2984	27.76	49.4669
Rainfed	SR_2023	2	1	9	131	163	57.462	490	0.313673	29.76	41.6398
Rainfed	SR_2023	2	1	9	132	86	52.1475	430	0.239022	27.6	37.9275
Rainfed	SR_2023	2	1	9	133	193	66.268	400	0.258667	30.72	46.5625
Rainfed	SR_2023	2	1	9	134	173	73.542	455	0.2923	27.84	49.0661
Rainfed	SR_2023	2	1	9	135	187	64.979	415	0.289167	26.16	47.1407
Rainfed	SR_2023	2	1	10	136	130	64.65	500	0.3258	30.64	47.3368
Rainfed	SR_2023	2	1	10	137	58	74.67	400	0.37952	30.56	50.4188
Rainfed	SR_2023	2	1	10	138	29	62.2605	350	0.30976	25.32	47.03
Rainfed	SR_2023	2	1	10	139	192	72.303	350	0.25332	43.32	44.072
Rainfed	SR_2023	2	1	10	140	200	78.3915	465	0.290364	35.56	55.0956
Rainfed	SR_2023	2	1	10	141	56	82.5735	425	0.287033	26.52	51.825
Rainfed	SR_2023	2	1	10	142	170	98.3855	500	0.355114	36.08	50.3548
Rainfed	SR_2023	2	1	10	143	150	74.5565	500	0.3518	33.12	51.4372
Rainfed	SR_2023	2	1	10	144	137	80.1565	475	0.322067	39.24	43.3333
Rainfed	SR_2023	2	1	10	145	95	60.385	360	0.246	23.52	48.4694
Rainfed	SR_2023	2	1	10	146	64	81.1185	460	0.42185	50.44	24.5837
Rainfed	SR_2023	2	1	10	147	218	60.261	350	0.260756	26.84	48.5097
Rainfed	SR_2023	2	1	10	148	169	72.8395	425	0.315	46.4	42.4914
Rainfed	SR_2023	2	1	10	149	133	70.6095	390	0.3684	43.68	38.9286
Rainfed	SR_2023	2	1	10	150	16	78.317	410	0.290567	47.32	44.9451
Rainfed	SR_2023	2	1	11	151	105	78.8235	225	0.2184	32.92	42.7339
Rainfed	SR_2023	2	1	11	152	8	57.9985	375	0.329556	29.36	47.4387
Rainfed	SR_2023	2	1	11	153	81	71.93	350	0.363244	38.2	43.8429
Rainfed	SR_2023	2	1	11	154	69	83.593	375	0.37565	30.24	45.9392
Rainfed	SR_2023	2	1	11	155	175	79.737	375	0.3338	37.44	44.8504
Rainfed	SR_2023	2	1	11	156	142	64.959	450	0.331415	39.48	49.1084
Rainfed	SR_2023	2	1	11	157	73	60.6	350	0.317556	43.2	43.1019
Rainfed	SR_2023	2	1	11	158	172	68.167	290	0.3296	41.16	34.1497
Rainfed	SR_2023	2	1	11	159	71	65.033	860	0.3408	36.84	48.317
Rainfed	SR_2023	2	1	11	160	221	68.42	500	0.295345	25.6	51.8438
Rainfed	SR_2023	2	1	11	161	50	74.0835	500	0.3158	32.08	39.813
Rainfed	SR_2023	2	1	11	162	164	78.3565	360	0.337943	29.44	46.1821
Rainfed	SR_2023	2	1	11	163	57	76.452	410	0.331067	38.52	40.0312
Rainfed	SR_2023	2	1	11	164	174	62.4065	525	0.323767	33.2	42.1687
Rainfed	SR_2023	2	1	11	165	54	79.4625	425	0.319636	40.72	43.5658
Rainfed	SR_2023	2	1	12	166	113	68.5745	425	0.362444	25.16	49.1892
Rainfed	SR_2023	2	1	12	167	103	85.5005	485	0.370033	33.68	41.5677
Rainfed	SR_2023	2	1	12	168	199	75.8545	410	0.34544	32.56	52.4939
Rainfed	SR_2023	2	1	12	169	61	80.5285	575	0.360507	33.16	52.3281
Rainfed	SR_2023	2	1	12	170	124	61.024	325	0.231644	35.16	47.0535
Rainfed	SR_2023	2	1	12	171	171	81.6175	475	0.380109	34.8	38.8736
Rainfed	SR_2023	2	1	12	172	139	65.0965	500	0.255908	35.88	44.3255
Rainfed	SR_2023	2	1	12	173	9	59.4155	375	0.300073	34.44	49.698
Rainfed	SR_2023	2	1	12	174	207	72.147	315	0.273867	35	47.2229
Rainfed	SR_2023	2	1	12	175	24	68.9795	400	0.3181	37.88	47.4868
Rainfed	SR_2023	2	1	12	176	46	64.6675	425	0.302291	38.88	42.4074
Rainfed	SR_2023	2	1	12	177	155	66.369	525	0.395527	24.64	46.4448
Rainfed	SR_2023	2	1	12	178	68	72.466	465	0.371067	29.44	35.0951
Rainfed	SR_2023	2	1	12	179	148	71.1345	410	0.223556	34.12	42.6612
Rainfed	SR_2023	2	1	12	180	32	68.164	510	0.3846	39.16	46.6496
Rainfed	SR_2023	2	1	13	181	147	71.255	440	0.2818	35.52	41.2725
Rainfed	SR_2023	2	1	13	182	141	67.3475	475	0.378109	30.88	45.2979
Rainfed	SR_2023	2	1	13	183	222	65.422	375	0.2616	27.96	46.6094
Rainfed	SR_2023	2	1	13	184	153	74.9	350	0.32975	32.56	36.9165
Rainfed	SR_2023	2	1	13	185	40	73.229	565	0.308033	32.2	42.4472
Rainfed	SR_2023	2	1	13	186	134	73.1945	500	0.3892	37.08	40.8414
Rainfed	SR_2023	2	1	13	187	6	78.877	545	0.316867	35.56	42.1597
Rainfed	SR_2023	2	1	13	188	91	71.083	570	0.35	37.2	31.8925
Rainfed	SR_2023	2	1	13	189	216	73.997	475	0.288033	41.48	42.9412
Rainfed	SR_2023	2	1	13	190	2	83.642	500	0.334985	34.72	49.5046
Rainfed	SR_2023	2	1	13	191	80	76.202	375	0.31336	31.84	48.6181
Rainfed	SR_2023	2	1	13	192	100	70.709	550	0.340343	28.16	48.3807
Rainfed	SR_2023	2	1	13	193	30	53.416	375	0.261533	36.6	50.1202
Rainfed	SR_2023	2	1	13	194	161	76.5935	450	0.313657	40.6	50.335
Rainfed	SR_2023	2	1	13	195	143	69.9905	405	0.257345	36.88	42.3427
Rainfed	SR_2023	2	1	14	196	18	78.2635	310	0.259111	42.12	41.7569
Rainfed	SR_2023	2	1	14	197	3	79.477	450	0.2882	38.76	49.6182
Rainfed	SR_2023	2	1	14	198	77	72.91	445	0.365433	30.56	46.5576
Rainfed	SR_2023	2	1	14	199	117	71.419	425	0.263309	30.24	47.5794
Rainfed	SR_2023	2	1	14	200	4	67.79	350	0.281	32.48	47.4754
Rainfed	SR_2023	2	1	14	201	224	56.527	350	0.276044	31.4	54.051
Rainfed	SR_2023	2	1	14	202	38	54.4605	405	0.25364	38.16	40.6709
Rainfed	SR_2023	2	1	14	203	53	63.057	460	0.258057	32.28	50.5824
Rainfed	SR_2023	2	1	14	204	122	61.9065	300	0.280578	30.08	50.5319
Rainfed	SR_2023	2	1	14	205	154	60.2335	250	0.182044	33.6	54.4167
Rainfed	SR_2023	2	1	14	206	185	73.6495	375	0.282945	35.8	46.0112
Rainfed	SR_2023	2	1	14	207	26	61.08	475	0.2247	25	51.504
Rainfed	SR_2023	2	1	14	208	112	73.2385	310	0.22796	30.92	50.1682
Rainfed	SR_2023	2	1	14	209	59	77.2565	410	0.294567	43.52	42.0588
Rainfed	SR_2023	2	1	14	210	107	64.9325	400	0.293556	34.04	37.1328
Rainfed	SR_2023	2	1	15	211	125	64.054	450	0.28324	32.36	38.6527
Rainfed	SR_2023	2	1	15	212	131	67.1725	340	0.25535	32.72	44.4743
Rainfed	SR_2023	2	1	15	213	10	66.6265	245	0.137867	29	43.931
Rainfed	SR_2023	2	1	15	214	149	69.5215	460	0.3798	31.68	41.0101
Rainfed	SR_2023	2	1	15	215	5	65.383	575	0.383233	28.08	46.567
Rainfed	SR_2023	2	1	15	216	202	65.8945	265	0.29	28.2	48.4255
Rainfed	SR_2023	2	1	15	217	194	62.8425	360	0.364	32.2	43.5404
Rainfed	SR_2023	2	1	15	218	118	63.533	325	0.332914	41.48	40.8872
Rainfed	SR_2023	2	1	15	219	184	68.768	360	0.3452	20.92	54.1491
Rainfed	SR_2023	2	1	15	220	217	58.277	425	0.37845	32.52	41.6359
Rainfed	SR_2023	2	1	15	221	159	58.3755	435	0.300971	33	48.2909
Rainfed	SR_2023	2	1	15	222	75	58.4005	340	0.233	34.64	48.9723
Rainfed	SR_2023	2	1	15	223	62	67.0155	325	0.314733	29.44	42.2554
Rainfed	SR_2023	2	1	15	224	225	49.6195	385	0.26752	27.76	43.9625
Rainfed	SR_2023	2	1	15	225	28	67.186	410	0.272222	38.12	40.3673
Rainfed	SR_2023	2	2	1	226	113	49.1905	465	0.27696	24.44	43.4861
Rainfed	SR_2023	2	2	1	227	204	58.345	510	0.367511	32.04	37.7154
Rainfed	SR_2023	2	2	1	228	138	63.2695	460	0.376145	30.24	48.8757
Rainfed	SR_2023	2	2	1	229	122	66.5335	360	0.346844	33.4	39.0778
Rainfed	SR_2023	2	2	1	230	43	66.241	460	0.297745	38.6	41.3886
Rainfed	SR_2023	2	2	1	231	189	60.8195	475	0.3026	32.64	31.3848
Rainfed	SR_2023	2	2	1	232	136	57.614	575	0.3136	27.2	32.6471
Rainfed	SR_2023	2	2	1	233	45	68.3225	425	0.3904	21.8	81.8532
Rainfed	SR_2023	2	2	1	234	119	76.4505	435	0.352982	40.36	28.6819
Rainfed	SR_2023	2	2	1	235	89	65.395	525	0.336533	33.24	34.8255
Rainfed	SR_2023	2	2	1	236	202	62.0555	410	0.164853	25.2	49.6667
Rainfed	SR_2023	2	2	1	237	199	81.8195	510	0.3372	28.84	48.2663
Rainfed	SR_2023	2	2	1	238	124	74.574	315	0.224756	40.24	49.6123
Rainfed	SR_2023	2	2	1	239	139	70.66	405	0.305273	34.4	42.1512
Rainfed	SR_2023	2	2	1	240	44	68.6845	410	0.40435	36.6	46.7978
Rainfed	SR_2023	2	2	2	241	223	64.5445	390	0.300533	25.68	48.7072
Rainfed	SR_2023	2	2	2	242	82	70.3195	425	0.254909	33.08	48.7183
Rainfed	SR_2023	2	2	2	243	56	74.6135	410	0.230092	32.52	54.7232
Rainfed	SR_2023	2	2	2	244	193	63.367	410	0.293692	32.68	52.4969
Rainfed	SR_2023	2	2	2	245	198	67.698	400	0.319018	35.36	52.2964
Rainfed	SR_2023	2	2	2	246	111	54.4175	400	0.299127	27.16	54.6244
Rainfed	SR_2023	2	2	2	247	210	68.5615	460	0.320431	41.72	40.3547
Rainfed	SR_2023	2	2	2	248	95	63.565	465	0.275867	29.28	51.2842
Rainfed	SR_2023	2	2	2	249	77	68.1275	610	0.316425	33.16	48.2268
Rainfed	SR_2023	2	2	2	250	147	66.4435	540	0.309631	34.8	39.3563
Rainfed	SR_2023	2	2	2	251	14	77.6835	50	0.327914	37.28	49.2489
Rainfed	SR_2023	2	2	2	252	154	65.0385	430	0.298509	32.96	50.5825
Rainfed	SR_2023	2	2	2	253	215	78.4925	350	0.278182	42.12	50.6648
Rainfed	SR_2023	2	2	2	254	105	74.3985	300	0.393911	38.12	42.3295
Rainfed	SR_2023	2	2	2	255	219	69.147	550	0.266215	27.24	47.6065
Rainfed	SR_2023	2	2	3	256	16	82.985	390	0.309491	54.52	42.2524
Rainfed	SR_2023	2	2	3	257	127	57.003	360	0.279289	27.16	45.9794
Rainfed	SR_2023	2	2	3	258	53	79.506	390	0.335822	41.08	41.4411
Rainfed	SR_2023	2	2	3	259	64	68.9565	500	0.314291	32.2	44.3478
Rainfed	SR_2023	2	2	3	260	224	65.2085	410	0.276582	28.96	49.8757
Rainfed	SR_2023	2	2	3	261	205	76.4515	350	0.246873	35.52	45.2027
Rainfed	SR_2023	2	2	3	262	168	69.7125	575	0.229323	23.56	45.365
Rainfed	SR_2023	2	2	3	263	79	78.477	490	0.318154	33.92	49.6934
Rainfed	SR_2023	2	2	3	264	171	79.3615	400	0.32108	39.16	39.7957
Rainfed	SR_2023	2	2	3	265	200	78.6765	350	0.364622	29.04	40.6198
Rainfed	SR_2023	2	2	3	266	188	78.027	450	0.286185	42.08	48.0323
Rainfed	SR_2023	2	2	3	267	173	79.6675	360	0.311022	28.04	51.883
Rainfed	SR_2023	2	2	3	268	169	62.947	510	0.3024	35.6	28.9663
Rainfed	SR_2023	2	2	3	269	158	64.016	410	0.295689	26.2	39.374
Rainfed	SR_2023	2	2	3	270	132	61.2105	510	0.3259	40.16	27.3307
Rainfed	SR_2023	2	2	4	271	48	65.443	490	0.283818	35.6	35.7416
Rainfed	SR_2023	2	2	4	272	32	64.7965	355	0.331422	30.12	41.6467
Rainfed	SR_2023	2	2	4	273	21	55.0255	510	0.133138	33.8	28.6864
Rainfed	SR_2023	2	2	4	274	217	66.462	355	0.32015	30.24	42.6058
Rainfed	SR_2023	2	2	4	275	151	59.54	425	0.312	32.92	50.0608
Rainfed	SR_2023	2	2	4	276	222	60.8455	510	0.326467	28.32	49.3927
Rainfed	SR_2023	2	2	4	277	72	64.035	450	0.300215	36.96	45.5952
Rainfed	SR_2023	2	2	4	278	40	61.663	475	0.319018	32.72	37.3227
Rainfed	SR_2023	2	2	4	279	67	63.064	510	0.359767	29.96	48.5314
Rainfed	SR_2023	2	2	4	280	146	63.5525	420	0.28608	25.56	85.3365
Rainfed	SR_2023	2	2	4	281	57	66.331	475	0.244255	29.08	47.3865
Rainfed	SR_2023	2	2	4	282	4	63.952	550	0.155371	42.92	37.8938
Rainfed	SR_2023	2	2	4	283	59	60.643	475	0.2982	44.08	28.4936
Rainfed	SR_2023	2	2	4	284	184	60.2565	550	0.323262	26	43.1846
Rainfed	SR_2023	2	2	4	285	35	64.451	450	0.3788	29.6	41.6892
Rainfed	SR_2023	2	2	5	286	34	59.958	490	0.360836	30.72	40.2734
Rainfed	SR_2023	2	2	5	287	94	70.845	450	0.357956	35.08	42.5998
Rainfed	SR_2023	2	2	5	288	33	67.9075	625	0.44518	36.76	40.6638
Rainfed	SR_2023	2	2	5	289	61	69.977	525	0.231231	24.36	51.5435
Rainfed	SR_2023	2	2	5	290	185	72.0755	540	0.306543	32.72	40.6112
Rainfed	SR_2023	2	2	5	291	13	61.0565	400	0.271964	29.96	52.5234
Rainfed	SR_2023	2	2	5	292	12	55.271	460	0.261564	33.32	43.8055
Rainfed	SR_2023	2	2	5	293	207	59.8695	450	0.276277	30.96	47.2868
Rainfed	SR_2023	2	2	5	294	19	69.7095	430	0.300545	29.6	49.3784
Rainfed	SR_2023	2	2	5	295	11	67.689	410	0.348655	28.68	48.675
Rainfed	SR_2023	2	2	5	296	177	66.672	475	0.3231	31.32	49.1826
Rainfed	SR_2023	2	2	5	297	9	51.6615	275	0.27584	19.12	49.6862
Rainfed	SR_2023	2	2	5	298	71	68.944	410	0.340218	37.28	46.4807
Rainfed	SR_2023	2	2	5	299	30	51.97	475	0.300215	26.64	49.2943
Rainfed	SR_2023	2	2	5	300	66	71.919	475	0.3524	34.16	58.1499
Rainfed	SR_2023	2	2	6	301	128	57.902	420	0.29948	35.92	45.8463
Rainfed	SR_2023	2	2	6	302	62	58.2495	380	0.39785	29.64	47.8003
Rainfed	SR_2023	2	2	6	303	81	68.487	430	0.320364	34.56	47.037
Rainfed	SR_2023	2	2	6	304	5	75.9175	500	0.4108	28	51.5857
Rainfed	SR_2023	2	2	6	305	93	60.555	410	0.36832	29.36	49.0736
Rainfed	SR_2023	2	2	6	306	141	56.686	375	0.3945	39.56	36.2184
Rainfed	SR_2023	2	2	6	307	39	58.706	400	0.305018	34.08	53.0986
Rainfed	SR_2023	2	2	6	308	144	64.2645	400	0.383689	32.36	45.686
Rainfed	SR_2023	2	2	6	309	70	51.9805	275	0.313267	32.76	50.8181
Rainfed	SR_2023	2	2	6	310	206	77.2485	420	0.3272	33.24	41.1191
Rainfed	SR_2023	2	2	6	311	209	56.232	375	0.295086	27.64	46.3097
Rainfed	SR_2023	2	2	6	312	74	60.993	310	0.3388	35	47.5086
Rainfed	SR_2023	2	2	6	313	49	80.56	510	0.362343	44.56	37.1454
Rainfed	SR_2023	2	2	6	314	47	77.8525	300	0.34535	34.04	42.2797
Rainfed	SR_2023	2	2	6	315	27	75.7765	415	0.350222	25.4	54.6929
Rainfed	SR_2023	2	2	7	316	108	73.232	325	0.318229	33.44	46.5909
Rainfed	SR_2023	2	2	7	317	221	73.821	510	0.348867	27.8	50.0144
Rainfed	SR_2023	2	2	7	318	176	64.1165	375	0.30216	34.16	48.9344
Rainfed	SR_2023	2	2	7	319	65	84.263	390	0.3529	35.68	41.1211
Rainfed	SR_2023	2	2	7	320	167	79.1455	555	0.400733	34.52	42.5145
Rainfed	SR_2023	2	2	7	321	102	70.161	480	0.422982	27.96	37.0529
Rainfed	SR_2023	2	2	7	322	22	54.836	350	0.3384	52.24	33.7213
Rainfed	SR_2023	2	2	7	323	69	60.4245	430	0.4065	39.16	32.8805
Rainfed	SR_2023	2	2	7	324	51	54.586	510	0.362691	26.8	34.2985
Rainfed	SR_2023	2	2	7	325	24	57.5665	625	0.3002	36.28	43.2856
Rainfed	SR_2023	2	2	7	326	26	61.9005	450	0.380933	28.8	47.6389
Rainfed	SR_2023	2	2	7	327	15	60.7285	400	0.31132	39.08	42.7226
Rainfed	SR_2023	2	2	7	328	114	62.114	380	0.365156	34.92	41.3746
Rainfed	SR_2023	2	2	7	329	163	69.4575	400	0.35784	32.6	45.0184
Rainfed	SR_2023	2	2	7	330	100	73.1665	660	0.357508	27.72	47.8211
Rainfed	SR_2023	2	2	8	331	84	82.761	390	0.43715	30.04	47.6565
Rainfed	SR_2023	2	2	8	332	149	72.4345	400	0.37936	36.04	43.1188
Rainfed	SR_2023	2	2	8	333	80	71.884	440	0.36356	26.96	44.1988
Rainfed	SR_2023	2	2	8	334	174	76.7865	560	0.375292	29.48	40.3799
Rainfed	SR_2023	2	2	8	335	160	73.1995	375	0.3194	39.44	46.7951
Rainfed	SR_2023	2	2	8	336	121	64.618	305	0.4396	30.2	41.6026
Rainfed	SR_2023	2	2	8	337	37	55.2215	295	0.31064	31.08	39.3822
Rainfed	SR_2023	2	2	8	338	145	69.4245	415	0.4486	34.76	48.0667
Rainfed	SR_2023	2	2	8	339	225	66.248	275	0.3228	28.68	56.4435
Rainfed	SR_2023	2	2	8	340	153	60.7865	420	0.41875	36.32	39.6256
Rainfed	SR_2023	2	2	8	341	214	64.852	380	0.28875	26.36	48.9985
Rainfed	SR_2023	2	2	8	342	208	62.2875	310	0.3258	25.4	56.0472
Rainfed	SR_2023	2	2	8	343	2	72.376	460	0.353891	35.32	48.9241
Rainfed	SR_2023	2	2	8	344	23	71.891	325	0.33535	38	42.8947
Rainfed	SR_2023	2	2	8	345	88	70.8445	325	0.296311	27.12	46.0472
Rainfed	SR_2023	2	2	9	346	181	68.4375	350	0.235745	33.84	53.0969
Rainfed	SR_2023	2	2	9	347	157	67.232	250	0.1976	32.04	48.764
Rainfed	SR_2023	2	2	9	348	156	68.8045	140	0.120133	28.76	50.1808
Rainfed	SR_2023	2	2	9	349	38	77.3555	425	0.379778	35.84	42.0312
Rainfed	SR_2023	2	2	9	350	166	66.356	475	0.3712	33.16	50.3739
Rainfed	SR_2023	2	2	9	351	190	64.644	565	0.322827	29.64	53.7382
Rainfed	SR_2023	2	2	9	352	112	81.0385	400	0.3061	39.8	50.191
Rainfed	SR_2023	2	2	9	353	123	82.96	500	0.334267	38.84	40.0824
Rainfed	SR_2023	2	2	9	354	55	84.793	405	0.410218	32.52	52.952
Rainfed	SR_2023	2	2	9	355	161	81.307	380	0.3356	41.16	52.3324
Rainfed	SR_2023	2	2	9	356	180	79.996	450	0.347867	32.28	49.0211
Rainfed	SR_2023	2	2	9	357	96	63.449	435	0.32035	25.44	54.8899
Rainfed	SR_2023	2	2	9	358	162	67.9825	350	0.3631	33	48.5212
Rainfed	SR_2023	2	2	9	359	118	69.122	450	0.355164	36.24	48.3113
Rainfed	SR_2023	2	2	9	360	213	65.5955	380	0.292585	31.08	53.8224
Rainfed	SR_2023	2	2	10	361	10	52.969	425	0.268229	26.88	49.7619
Rainfed	SR_2023	2	2	10	362	131	60.9835	335	0.23175	28.64	45.1397
Rainfed	SR_2023	2	2	10	363	106	64.451	400	0.287	37.52	45.7569
Rainfed	SR_2023	2	2	10	364	150	56.3075	375	0.2472	31.56	52.4081
Rainfed	SR_2023	2	2	10	365	36	56.4125	350	0.222311	32.64	50.527
Rainfed	SR_2023	2	2	10	366	197	59.3665	355	0.280133	29.16	59.3964
Rainfed	SR_2023	2	2	10	367	101	59.555	525	0.263943	23.08	51.5078
Rainfed	SR_2023	2	2	10	368	172	65.5705	370	0.31205	41.52	36.6089
Rainfed	SR_2023	2	2	10	369	164	54.9125	350	0.3511	31.92	48.9098
Rainfed	SR_2023	2	2	10	370	75	69.8475	550	0.367914	32.84	51.3764
Rainfed	SR_2023	2	2	10	371	41	65.5895	475	0.338909	31.24	46.8502
Rainfed	SR_2023	2	2	10	372	212	71.658	500	0.398	32.52	51.1808
Rainfed	SR_2023	2	2	10	373	116	55.952	430	0.328	28.28	45.884
Rainfed	SR_2023	2	2	10	374	134	59.714	375	0.34065	36.4	43.022
Rainfed	SR_2023	2	2	10	375	211	48.562	455	0.2812	32.76	30.4518
Rainfed	SR_2023	2	2	11	376	6	48.1905	375	0.323371	32.08	45.1621
Rainfed	SR_2023	2	2	11	377	99	57.7815	475	0.3208	30.88	39.4171
Rainfed	SR_2023	2	2	11	378	73	62.38	260	0.2268	41.4	44.0386
Rainfed	SR_2023	2	2	11	379	103	72.2525	365	0.323689	33.16	52.1351
Rainfed	SR_2023	2	2	11	380	97	67.311	425	0.273533	38.92	47.4409
Rainfed	SR_2023	2	2	11	381	85	74.379	500	0.406978	29.44	40.7745
Rainfed	SR_2023	2	2	11	382	25	59.4145	410	0.353689	42.88	34.2444
Rainfed	SR_2023	2	2	11	383	178	61.5375	335	0.42672	31.04	48.2088
Rainfed	SR_2023	2	2	11	384	18	66.251	460	0.369309	36.84	39.5874
Rainfed	SR_2023	2	2	11	385	201	51.447	550	0.346114	31.84	43.7186
Rainfed	SR_2023	2	2	11	386	17	43.2275	385	0.32955	25.24	50.1426
Rainfed	SR_2023	2	2	11	387	159	46.631	265	0.3166	28.84	51.4979
Rainfed	SR_2023	2	2	11	388	195	58.3725	280	0.3014	30.64	47.3107
Rainfed	SR_2023	2	2	11	389	175	64.7175	430	0.3822	29.36	44.8365
Rainfed	SR_2023	2	2	11	390	110	57.7545	360	0.342914	31.28	49.9744
Rainfed	SR_2023	2	2	12	391	148	51.6245	260	0.282467	34.4	39.6744
Rainfed	SR_2023	2	2	12	392	87	75.469	610	0.36675	32.12	34.4707
Rainfed	SR_2023	2	2	12	393	191	63.606	400	0.2124	38.68	41.0651
Rainfed	SR_2023	2	2	12	394	182	60.2895	450	0.312545	24	51.4
Rainfed	SR_2023	2	2	12	395	58	78.7255	405	0.424565	28.36	53.3992
Rainfed	SR_2023	2	2	12	396	76	68.7665	500	0.333846	37.76	48.5487
Rainfed	SR_2023	2	2	12	397	91	74.9265	325	0.239143	42.76	37.1188
Rainfed	SR_2023	2	2	12	398	54	77.741	400	0.462667	37.12	48.1897
Rainfed	SR_2023	2	2	12	399	137	68.4195	525	0.318833	31.4	42.9809
Rainfed	SR_2023	2	2	12	400	60	75.2855	360	0.29712	33.08	51.3059
Rainfed	SR_2023	2	2	12	401	165	69.473	435	0.281309	30.12	42.6295
Rainfed	SR_2023	2	2	12	402	86	55.172	460	0.334044	23.56	46.3158
Rainfed	SR_2023	2	2	12	403	130	72.39	330	0.299886	27.44	44.1983
Rainfed	SR_2023	2	2	12	404	192	92.8405	510	0.3574	34.44	46.1324
Rainfed	SR_2023	2	2	12	405	186	86.966	540	0.353057	36.96	43.0195
Rainfed	SR_2023	2	2	13	406	50	73.9515	305	0.3276	28.72	51.1142
Rainfed	SR_2023	2	2	13	407	7	58.874	350	0.114036	33.68	47.6485
Rainfed	SR_2023	2	2	13	408	187	58.0835	430	0.381289	22.52	51.2966
Rainfed	SR_2023	2	2	13	409	28	60.653	500	0.392873	32.44	45.6473
Rainfed	SR_2023	2	2	13	410	203	66.0285	440	0.3122	29.76	57.1505
Rainfed	SR_2023	2	2	13	411	170	57.8265	370	0.331543	26.8	48.5224
Rainfed	SR_2023	2	2	13	412	216	49.9895	330	0.292044	32.72	44.1076
Rainfed	SR_2023	2	2	13	413	125	44.8435	175	0.125467	25.52	41.4734
Rainfed	SR_2023	2	2	13	414	78	43.6935	335	0.333	23.28	46.2543
Rainfed	SR_2023	2	2	13	415	126	38.6965	375	0.236267	21.64	45.7856
Rainfed	SR_2023	2	2	13	416	29	44.8805	415	0.3416	27.44	46.3994
Rainfed	SR_2023	2	2	13	417	8	52.7015	350	0.414578	25.12	52.1497
Rainfed	SR_2023	2	2	13	418	194	57.535	425	0.192769	30.6	44.5098
Rainfed	SR_2023	2	2	13	419	120	60.529	270	0.2616	30.64	48.1462
Rainfed	SR_2023	2	2	13	420	31	52.9325	350	0.2008	32.8	43.2317
Rainfed	SR_2023	2	2	14	421	115	54.9665	440	0.3556	42.72	48.0524
Rainfed	SR_2023	2	2	14	422	63	66.181	425	0.285127	29.36	45.2452
Rainfed	SR_2023	2	2	14	423	117	67.253	400	0.343822	37.72	45.281
Rainfed	SR_2023	2	2	14	424	155	56.168	475	0.307309	31.96	49.8748
Rainfed	SR_2023	2	2	14	425	133	65.6955	410	0.3668	39.8	36.9045
Rainfed	SR_2023	2	2	14	426	107	63.81	440	0.283	34.04	39.1304
Rainfed	SR_2023	2	2	14	427	1	64.189	550	0.322462	34.64	48.4758
Rainfed	SR_2023	2	2	14	428	129	66.1375	465	0.369309	37.4	47.262
Rainfed	SR_2023	2	2	14	429	143	56.4785	460	0.268967	31.16	35.7895
Rainfed	SR_2023	2	2	14	430	90	50.5025	340	0.339133	26.84	50.9389
Rainfed	SR_2023	2	2	14	431	98	55.9215	455	0.314222	27.12	37.9499
Rainfed	SR_2023	2	2	14	432	142	59.3125	450	0.235382	26.16	48.1957
Rainfed	SR_2023	2	2	14	433	46	48.593	355	0.27345	33.12	47.3068
Rainfed	SR_2023	2	2	14	434	3	50.6005	305	0.306467	29.6	46
Rainfed	SR_2023	2	2	14	435	196	44.9005	365	0.25275	24.56	41.4658
Rainfed	SR_2023	2	2	15	436	42	35.412	380	0.363933	19.4	42.5773
Rainfed	SR_2023	2	2	15	437	135	32.171	275	0.302067	27.92	43.1375
Rainfed	SR_2023	2	2	15	438	152	48.1715	380	0.405667	37.68	39.8938
Rainfed	SR_2023	2	2	15	439	20	58.487	425	0.186467	27.16	48.3063
Rainfed	SR_2023	2	2	15	440	140	44.334	425	0.2422	26.6	48.1504
Rainfed	SR_2023	2	2	15	441	52	65.202	410	0.342622	30.44	41.9842
Rainfed	SR_2023	2	2	15	442	109	47.0975	435	0.3749	23.6	45.7119
Rainfed	SR_2023	2	2	15	443	220	64.0415	430	0.184873	32.2	47.1925
Rainfed	SR_2023	2	2	15	444	68	78.3605	440	0.349564	32.04	40.0499
Rainfed	SR_2023	2	2	15	445	179	70.928	560	0.325754	32.2	41.8509
Rainfed	SR_2023	2	2	15	446	183	70.3485	450	0.343333	29.64	56.6397
Rainfed	SR_2023	2	2	15	447	104	78.4825	500	0.402533	40	42.89
Rainfed	SR_2023	2	2	15	448	83	64.644	515	0.480971	32.48	45.2094
Rainfed	SR_2023	2	2	15	449	218	68.3635	400	0.365244	5.28	31.1288
Rainfed	SR_2023	2	2	15	450	92	60.7055	425	0.373055	43	44.2047
Irrigated	SR_2022	3	1	1	1	36	84.366	855	0.314222	32.56	57.2727
Irrigated	SR_2022	3	1	1	2	215	69.2205	325	0.331	24.52	54.1762
Irrigated	SR_2022	3	1	1	3	49	78.6515	430	0.41808	34.52	50.4171
Irrigated	SR_2022	3	1	1	4	102	61.0935	440	0.232733	28	45.6571
Irrigated	SR_2022	3	1	1	5	151	52.8065	400	0.3926	19.16	56.096
Irrigated	SR_2022	3	1	1	6	65	86.9955	450	0.1872	20.56	44.9611
Irrigated	SR_2022	3	1	1	7	72	73.211	525	0.508133	26.64	52.3874
Irrigated	SR_2022	3	1	1	8	93	75.003	580	0.385493	31.8	50.9434
Irrigated	SR_2022	3	1	1	9	52	89.1725	500	0.3112	30.84	49.118
Irrigated	SR_2022	3	1	1	10	209	58.577	335	0.337133	26.4	46.9242
Irrigated	SR_2022	3	1	1	11	109	65.1505	500	0.331778	24.28	46.7216
Irrigated	SR_2022	3	1	1	12	48	76.3595	500	0.4042	33.2	49.5663
Irrigated	SR_2022	3	1	1	13	111	57.8955	485	0.32585	17.08	64.9649
Irrigated	SR_2022	3	1	1	14	47	106.408	445	0.444909	36.92	49.6316
Irrigated	SR_2022	3	1	1	15	188	100.852	460	0.423564	32.96	49.2112
Irrigated	SR_2022	3	1	2	16	31	72.0155	425	0.240044	29.12	49.8626
Irrigated	SR_2022	3	1	2	17	70	84.4735	425	0.3848	31.04	49.317
Irrigated	SR_2022	3	1	2	18	44	83.435	485	0.334	24.92	51.2039
Irrigated	SR_2022	3	1	2	19	110	97.288	410	0.365378	36.68	52.9444
Irrigated	SR_2022	3	1	2	20	106	106.203	415	0.383127	32.64	47.4265
Irrigated	SR_2022	3	1	2	21	121	97.232	465	0.41244	34	48.8588
Irrigated	SR_2022	3	1	2	22	67	102.218	395	0.206089	22.8	57.8596
Irrigated	SR_2022	3	1	2	23	63	121.498	500	0.4218	30.56	50.288
Irrigated	SR_2022	3	1	2	24	84	113.412	445	0.42185	33.68	52.0903
Irrigated	SR_2022	3	1	2	25	27	101.48	725	0.370031	27.44	64.6356
Irrigated	SR_2022	3	1	2	26	60	123.565	575	0.416057	33.52	60.4773
Irrigated	SR_2022	3	1	2	27	129	103.456	395	0.33464	34.92	57.8007
Irrigated	SR_2022	3	1	2	28	203	120.587	485	0.397508	25.04	59.9681
Irrigated	SR_2022	3	1	2	29	79	104.554	560	0.389292	33.56	59.0703
Irrigated	SR_2022	3	1	2	30	12	96.895	585	0.4258	21.64	48.8909
Irrigated	SR_2022	3	1	3	31	136	91.734	780	0.451911	18.2	50.5495
Irrigated	SR_2022	3	1	3	32	126	87.6605	875	0.304109	25.32	54.6288
Irrigated	SR_2022	3	1	3	33	144	119.747	510	0.497927	28.92	52.5726
Irrigated	SR_2022	3	1	3	34	19	121.375	545	0.39572	34.08	51.1385
Irrigated	SR_2022	3	1	3	35	181	102.984	510	0.37152	34.88	59.4037
Irrigated	SR_2022	3	1	3	36	83	99.359	535	0.371822	21.6	52.8148
Irrigated	SR_2022	3	1	3	37	104	127.418	440	0.414943	40.92	51.9355
Irrigated	SR_2022	3	1	3	38	116	97.208	625	0.461633	26.48	54.4713
Irrigated	SR_2022	3	1	3	39	7	99.374	345	0.363543	34.52	56.6165
Irrigated	SR_2022	3	1	3	40	37	77.1435	485	0.340343	26.16	43.2875
Irrigated	SR_2022	3	1	3	41	189	104.743	630	0.398473	19.08	53.0189
Irrigated	SR_2022	3	1	3	42	140	82.2755	665	0.407723	24.88	53.0547
Irrigated	SR_2022	3	1	3	43	208	107.51	650	0.421029	24.92	68.7801
Irrigated	SR_2022	3	1	3	44	135	85.841	655	0.526178	21.36	53.2397
Irrigated	SR_2022	3	1	3	45	146	84.749	575	0.35236	20.6	61.9223
Irrigated	SR_2022	3	1	4	46	96	105.188	575	0.43356	28.28	57.1004
Irrigated	SR_2022	3	1	4	47	183	100.047	540	0.345543	29.72	60.5787
Irrigated	SR_2022	3	1	4	48	20	88.23	415	0.396978	32.04	50.2871
Irrigated	SR_2022	3	1	4	49	115	63.1925	425	0.25075	28.48	54.3539
Irrigated	SR_2022	3	1	4	50	78	88.6635	435	0.316622	30.64	54.8695
Irrigated	SR_2022	3	1	4	51	145	91.45	350	0.20928	36.52	51.1281
Irrigated	SR_2022	3	1	4	52	43	79.0935	370	0.385943	31.2	50.4231
Irrigated	SR_2022	3	1	4	53	85	90.2905	345	0.375314	37.68	47.9087
Irrigated	SR_2022	3	1	4	54	14	83.9755	355	0.352743	25.52	51.3793
Irrigated	SR_2022	3	1	4	55	108	85.9265	380	0.37755	30.24	50.291
Irrigated	SR_2022	3	1	4	56	180	98.197	275	0.42776	28.08	50.5271
Irrigated	SR_2022	3	1	4	57	76	106.162	445	0.38044	29.04	52.5344
Irrigated	SR_2022	3	1	4	58	178	84.6405	420	0.300133	24.16	58.4106
Irrigated	SR_2022	3	1	4	59	25	80.789	510	0.40324	31.72	44.0984
Irrigated	SR_2022	3	1	4	60	15	84.497	345	0.326514	24.84	52.818
Irrigated	SR_2022	3	1	5	61	127	75.8525	475	0.3507	22.08	48.75
Irrigated	SR_2022	3	1	5	62	132	109.032	410	0.46935	37.84	44.1649
Irrigated	SR_2022	3	1	5	63	160	110.365	465	0.478533	32.4	55.0864
Irrigated	SR_2022	3	1	5	64	177	93.311	390	0.32085	34.52	54.5191
Irrigated	SR_2022	3	1	5	65	1	131.347	425	0.398291	35.64	53.2211
Irrigated	SR_2022	3	1	5	66	22	114.261	415	0.428	43.04	45.4647
Irrigated	SR_2022	3	1	5	67	89	110.722	530	0.456086	42.84	51.1765
Irrigated	SR_2022	3	1	5	68	223	103.141	485	0.39365	25.64	53.1981
Irrigated	SR_2022	3	1	5	69	166	114.52	495	0.357891	40.6	51.2118
Irrigated	SR_2022	3	1	5	70	120	89.6975	500	0.35328	24.84	57.3752
Irrigated	SR_2022	3	1	5	71	157	78.204	520	0.290711	27.88	55.4806
Irrigated	SR_2022	3	1	5	72	168	74.3505	500	0.326578	26	51.5846
Irrigated	SR_2022	3	1	5	73	90	80.467	435	0.307467	29.44	57.2011
Irrigated	SR_2022	3	1	5	74	13	75.8145	395	0.325511	25.36	60.0158
Irrigated	SR_2022	3	1	5	75	162	91.1695	375	0.345778	28.2	57.5745
Irrigated	SR_2022	3	1	6	76	138	109.308	570	0.344267	26.48	50.9063
Irrigated	SR_2022	3	1	6	77	156	78.325	385	0.276	27.56	52.6851
Irrigated	SR_2022	3	1	6	78	158	93.4095	550	0.387091	24.08	52.7243
Irrigated	SR_2022	3	1	6	79	167	90.572	400	0.370667	32.28	50.6072
Irrigated	SR_2022	3	1	6	80	82	104.481	550	0.452733	29.56	52.5169
Irrigated	SR_2022	3	1	6	81	11	81.1365	500	0.32752	25.32	56.6351
Irrigated	SR_2022	3	1	6	82	17	63.705	505	0.245771	26.04	47.7573
Irrigated	SR_2022	3	1	6	83	179	90.9195	635	0.382433	27.4	49.1387
Irrigated	SR_2022	3	1	6	84	186	135.929	525	0.382914	38.84	45.9011
Irrigated	SR_2022	3	1	6	85	55	128.136	330	0.37185	38.24	50.5649
Irrigated	SR_2022	3	1	6	86	51	139.639	355	0.39985	39.28	48.6864
Irrigated	SR_2022	3	1	6	87	94	127.544	540	0.40548	26.32	52.462
Irrigated	SR_2022	3	1	6	88	34	90.6305	640	0.3912	27	50.9185
Irrigated	SR_2022	3	1	6	89	211	102.835	375	0.3742	37.48	46.0406
Irrigated	SR_2022	3	1	6	90	97	115.264	500	0.36668	34.84	44.3398
Irrigated	SR_2022	3	1	7	91	165	92.0755	350	0.298933	36.48	40.2083
Irrigated	SR_2022	3	1	7	92	220	99.9485	425	0.56656	37.48	46.0512
Irrigated	SR_2022	3	1	7	93	101	96.585	410	0.3004	25.76	56.8634
Irrigated	SR_2022	3	1	7	94	195	108.138	515	0.425745	30.72	52.9557
Irrigated	SR_2022	3	1	7	95	98	102.115	545	0.429267	33.96	51.2485
Irrigated	SR_2022	3	1	7	96	87	99.9635	565	0.448582	40.36	40.5451
Irrigated	SR_2022	3	1	7	97	99	99.8045	390	0.37715	29.24	48.7825
Irrigated	SR_2022	3	1	7	98	214	95.148	325	0.394867	31.4	49.3376
Irrigated	SR_2022	3	1	7	99	206	87.638	425	0.360133	35.64	41.2233
Irrigated	SR_2022	3	1	7	100	21	76.2095	330	0.39185	44.84	40.8742
Irrigated	SR_2022	3	1	7	101	219	85.867	580	0.365365	32.2	52.2484
Irrigated	SR_2022	3	1	7	102	152	87.2055	425	0.367111	35.88	51.8506
Irrigated	SR_2022	3	1	7	103	191	87.196	350	0.353111	37.6	47.3085
Irrigated	SR_2022	3	1	7	104	41	81.9775	405	0.3691	23.36	52.6199
Irrigated	SR_2022	3	1	7	105	196	88.5035	325	0.351943	31.4	49.0191
Irrigated	SR_2022	3	1	8	106	182	82.943	430	0.373855	28.04	58.5592
Irrigated	SR_2022	3	1	8	107	39	77.386	390	0.4008	25.64	58.5023
Irrigated	SR_2022	3	1	8	108	204	99.1835	425	0.40645	33	45.3091
Irrigated	SR_2022	3	1	8	109	210	89.363	550	0.422291	36.44	50.6367
Irrigated	SR_2022	3	1	8	110	205	112.921	450	0.413233	34.32	45.979
Irrigated	SR_2022	3	1	8	111	35	85.72	450	0.340291	36.88	49.6963
Irrigated	SR_2022	3	1	8	112	213	93.0675	385	0.38155	24.6	56.9756
Irrigated	SR_2022	3	1	8	113	92	94.076	335	0.332857	34.92	49.5647
Irrigated	SR_2022	3	1	8	114	176	73.8715	550	0.357927	25.76	51.2422
Irrigated	SR_2022	3	1	8	115	197	108.419	550	0.387138	29.76	57.2043
Irrigated	SR_2022	3	1	8	116	123	103.761	475	0.34248	26.88	58.9435
Irrigated	SR_2022	3	1	8	117	114	101.874	350	0.35568	44.68	52.4351
Irrigated	SR_2022	3	1	8	118	88	98.054	435	0.3716	27.84	61.0201
Irrigated	SR_2022	3	1	8	119	33	105.741	375	0.293829	38.72	44.8347
Irrigated	SR_2022	3	1	8	120	23	111.93	400	0.319111	42.56	53.3741
Irrigated	SR_2022	3	1	9	121	190	87.409	500	0.402033	34.88	60.2867
Irrigated	SR_2022	3	1	9	122	128	86.164	675	0.409673	34.72	46.7972
Irrigated	SR_2022	3	1	9	123	201	108.796	530	0.407933	37.56	51.6826
Irrigated	SR_2022	3	1	9	124	74	90.0175	515	0.39776	33.72	54.4603
Irrigated	SR_2022	3	1	9	125	66	110.805	555	0.410233	27.6	55.1159
Irrigated	SR_2022	3	1	9	126	42	109.811	625	0.373689	22.4	57.3929
Irrigated	SR_2022	3	1	9	127	45	101.924	580	0.392743	18.44	53.7093
Irrigated	SR_2022	3	1	9	128	119	120.403	600	0.388509	33.4	55.3653
Irrigated	SR_2022	3	1	9	129	212	104.361	505	0.3492	26.84	59.4933
Irrigated	SR_2022	3	1	9	130	198	111.875	600	0.363273	27.92	53.8682
Irrigated	SR_2022	3	1	9	131	163	111.871	550	0.383018	23.6	54.4068
Irrigated	SR_2022	3	1	9	132	86	79.4905	715	0.28224	19.88	48.7928
Irrigated	SR_2022	3	1	9	133	193	99.288	580	0.374862	30.2	58.1854
Irrigated	SR_2022	3	1	9	134	173	119.558	515	0.37508	25.52	58.5893
Irrigated	SR_2022	3	1	9	135	187	100.941	300	0.36	28.76	55.3825
Irrigated	SR_2022	3	1	10	136	130	78.208	555	0.274711	16.12	55.4591
Irrigated	SR_2022	3	1	10	137	58	122.365	465	0.366945	31.96	58.0476
Irrigated	SR_2022	3	1	10	138	29	76.3345	550	0.2135	24.52	55.4486
Irrigated	SR_2022	3	1	10	139	192	100.633	465	0.33232	27.48	57.6274
Irrigated	SR_2022	3	1	10	140	200	122.6	550	0.455567	36.44	44.281
Irrigated	SR_2022	3	1	10	141	56	121.341	475	0.385857	32.08	58.3042
Irrigated	SR_2022	3	1	10	142	170	130.871	475	0.269467	40.84	50.5191
Irrigated	SR_2022	3	1	10	143	150	90.3405	605	0.389169	23.2	60.9138
Irrigated	SR_2022	3	1	10	144	137	104.248	515	0.37608	31.68	51.6793
Irrigated	SR_2022	3	1	10	145	95	106.46	380	0.3181	27	52.7259
Irrigated	SR_2022	3	1	10	146	64	120.633	580	0.406923	33.24	42.6113
Irrigated	SR_2022	3	1	10	147	218	99.4855	495	0.400943	36.32	54.3833
Irrigated	SR_2022	3	1	10	148	169	114.076	490	0.386233	40.96	44.5898
Irrigated	SR_2022	3	1	10	149	133	97.883	515	0.4214	38.6	42.7358
Irrigated	SR_2022	3	1	10	150	16	104.68	490	0.45245	41.72	45.6568
Irrigated	SR_2022	3	1	11	151	105	112.965	430	0.2924	47.16	45.6997
Irrigated	SR_2022	3	1	11	152	8	95.3155	275	0.312	46.8	50.3504
Irrigated	SR_2022	3	1	11	153	81	97.7865	475	0.424067	36.32	53.4251
Irrigated	SR_2022	3	1	11	154	69	102.197	490	0.3536	29.84	47.6273
Irrigated	SR_2022	3	1	11	155	175	95.927	510	0.358033	42.52	52.8034
Irrigated	SR_2022	3	1	11	156	142	88.8125	485	0.357233	28.64	54.581
Irrigated	SR_2022	3	1	11	157	73	104.268	500	0.410277	37.92	49.5992
Irrigated	SR_2022	3	1	11	158	172	99.9875	500	0.39136	39.68	42.248
Irrigated	SR_2022	3	1	11	159	71	87.7105	410	0.381233	37.4	47.9572
Irrigated	SR_2022	3	1	11	160	221	87.926	400	0.3196	35.2	55.25
Irrigated	SR_2022	3	1	11	161	50	100.329	535	0.257493	23.4	68.4274
Irrigated	SR_2022	3	1	11	162	164	88.0025	480	0.360073	31.04	59.317
Irrigated	SR_2022	3	1	11	163	57	112.403	500	0.35136	27.92	64.7851
Irrigated	SR_2022	3	1	11	164	174	105.394	400	0.348073	33.28	50.6731
Irrigated	SR_2022	3	1	11	165	54	109.641	375	0.443689	31.8	54.0755
Irrigated	SR_2022	3	1	12	166	113	72.4435	560	0.304364	22.12	54.557
Irrigated	SR_2022	3	1	12	167	103	101.496	495	0.302467	26.36	59.4689
Irrigated	SR_2022	3	1	12	168	199	89.2685	670	0.356154	29.16	54.3484
Irrigated	SR_2022	3	1	12	169	61	101.076	415	0.311467	30.16	57.1353
Irrigated	SR_2022	3	1	12	170	124	91.2445	475	0.36908	27.72	61.5007
Irrigated	SR_2022	3	1	12	171	171	92.4415	555	0.42732	25.68	49.8442
Irrigated	SR_2022	3	1	12	172	139	87.896	405	0.38185	28.12	51.9915
Irrigated	SR_2022	3	1	12	173	9	92.3575	455	0.3088	23.4	63.641
Irrigated	SR_2022	3	1	12	174	207	100.097	535	0.389286	36.76	55.1469
Irrigated	SR_2022	3	1	12	175	24	146.398	655	0.360259	40.16	54.6215
Irrigated	SR_2022	3	1	12	176	46	120.812	855	0.366867	28.44	50.8861
Irrigated	SR_2022	3	1	12	177	155	101.558	575	0.3676	28.72	55.8078
Irrigated	SR_2022	3	1	12	178	68	138.597	675	0.406585	24	49.6667
Irrigated	SR_2022	3	1	12	179	148	111.817	585	0.446867	34.36	55.0291
Irrigated	SR_2022	3	1	12	180	32	77.169	520	0.30348	30.84	55.1362
Irrigated	SR_2022	3	1	13	181	147	114.748	450	0.3313	28.4	47.4648
Irrigated	SR_2022	3	1	13	182	141	91.131	475	0.32085	26.84	57.3025
Irrigated	SR_2022	3	1	13	183	222	74.1045	460	0.3646	23.2	58.9138
Irrigated	SR_2022	3	1	13	184	153	95.2895	450	0.405055	30.8	57.6623
Irrigated	SR_2022	3	1	13	185	40	92.132	525	0.292333	36.84	54.2237
Irrigated	SR_2022	3	1	13	186	134	98.535	280	0.259333	29.4	56.8707
Irrigated	SR_2022	3	1	13	187	6	97.318	400	0.3513	27.32	52.8551
Irrigated	SR_2022	3	1	13	188	91	110.02	470	0.31448	29.76	42.7151
Irrigated	SR_2022	3	1	13	189	216	85.875	450	0.315822	35.44	52.4153
Irrigated	SR_2022	3	1	13	190	2	102.583	415	0.314044	34.6	53.1792
Irrigated	SR_2022	3	1	13	191	80	88.779	585	0.399533	32.36	56.5142
Irrigated	SR_2022	3	1	13	192	100	92.277	585	0.3635	29.44	56.3723
Irrigated	SR_2022	3	1	13	193	30	75.271	425	0.39885	28.96	56.1464
Irrigated	SR_2022	3	1	13	194	161	107.194	425	0.361267	32.2	56.5093
Irrigated	SR_2022	3	1	13	195	143	76.672	545	0.30644	22.32	48.0824
Irrigated	SR_2022	3	1	14	196	18	101.722	400	0.460089	35.36	46.2783
Irrigated	SR_2022	3	1	14	197	3	99.372	415	0.368	29.44	54.9457
Irrigated	SR_2022	3	1	14	198	77	92.155	515	0.375067	25.2	53.5079
Irrigated	SR_2022	3	1	14	199	117	93.3005	425	0.373091	32.44	53.5265
Irrigated	SR_2022	3	1	14	200	4	96.426	535	0.472267	27.16	54.2563
Irrigated	SR_2022	3	1	14	201	224	78.5355	335	0.322133	24.24	61.6997
Irrigated	SR_2022	3	1	14	202	38	76.851	475	0.404622	34.32	47.7622
Irrigated	SR_2022	3	1	14	203	53	80.377	460	0.441556	27.32	55.9151
Irrigated	SR_2022	3	1	14	204	122	86.714	375	0.34876	30.8	61.1558
Irrigated	SR_2022	3	1	14	205	154	69.125	380	0.358	24.2	59.3388
Irrigated	SR_2022	3	1	14	206	185	105.204	495	0.526044	28.04	50.9558
Irrigated	SR_2022	3	1	14	207	26	68.42	425	0.332844	29.44	59.1168
Irrigated	SR_2022	3	1	14	208	112	88.3775	405	0.34696	33.44	54.7967
Irrigated	SR_2022	3	1	14	209	59	102.208	475	0.426167	34.32	48.1469
Irrigated	SR_2022	3	1	14	210	107	101.558	425	0.339309	35.52	53.8964
Irrigated	SR_2022	3	1	15	211	125	75.5595	390	0.4516	34.92	49.7709
Irrigated	SR_2022	3	1	15	212	131	94.538	400	0.5302	34.2	52.3041
Irrigated	SR_2022	3	1	15	213	10	90.494	585	0.3393	29.44	58.5462
Irrigated	SR_2022	3	1	15	214	149	111.013	335	0.378073	30.84	53.5409
Irrigated	SR_2022	3	1	15	215	5	125.625	500	0.28548	31.36	58.8393
Irrigated	SR_2022	3	1	15	216	202	81.0425	485	0.348433	35.04	52.8767
Irrigated	SR_2022	3	1	15	217	194	105.148	480	0.39504	29.96	52.3364
Irrigated	SR_2022	3	1	15	218	118	103.685	310	0.334	29.72	63.1225
Irrigated	SR_2022	3	1	15	219	184	93.124	485	0.353046	23.52	64.1837
Irrigated	SR_2022	3	1	15	220	217	87.8115	475	0.377891	32.28	52.4287
Irrigated	SR_2022	3	1	15	221	159	84.228	375	0.364073	23.92	65.9532
Irrigated	SR_2022	3	1	15	222	75	94.7325	520	0.366667	26.8	59.1791
Irrigated	SR_2022	3	1	15	223	62	120.317	430	0.4024	39.4	51.269
Irrigated	SR_2022	3	1	15	224	225	90.0765	525	0.400987	34.64	59.0762
Irrigated	SR_2022	3	1	15	225	28	85.8855	405	0.321	30.92	53.5705
Irrigated	SR_2022	3	2	1	226	113	76.0525	425	0.307257	22.44	57.5401
Irrigated	SR_2022	3	2	1	227	204	93.705	530	0.437164	25.4	45.4803
Irrigated	SR_2022	3	2	1	228	138	89.842	440	0.299086	24.6	56.0976
Irrigated	SR_2022	3	2	1	229	122	95.2185	425	0.292267	31.24	59.7823
Irrigated	SR_2022	3	2	1	230	43	96.2755	525	0.34776	29.44	52.4049
Irrigated	SR_2022	3	2	1	231	189	106.743	525	0.392727	31	54
Irrigated	SR_2022	3	2	1	232	136	92.7255	575	0.279636	25.2	51.7619
Irrigated	SR_2022	3	2	1	233	45	101.141	525	0.348	33.52	56.2172
Irrigated	SR_2022	3	2	1	234	119	116.858	400	0.383733	33.56	54.6007
Irrigated	SR_2022	3	2	1	235	89	115.86	500	0.381964	33.68	50.0713
Irrigated	SR_2022	3	2	1	236	202	99.833	510	0.334618	31.08	51.0167
Irrigated	SR_2022	3	2	1	237	199	123.102	550	0.376109	32.12	54.3088
Irrigated	SR_2022	3	2	1	238	124	107.856	445	0.374567	33.44	59.5096
Irrigated	SR_2022	3	2	1	239	139	91.789	500	0.363733	25.68	52.866
Irrigated	SR_2022	3	2	1	240	44	87.27	560	0.362222	26.28	51.5982
Irrigated	SR_2022	3	2	2	241	223	99.306	625	0.550979	26	56.3692
Irrigated	SR_2022	3	2	2	242	82	115.174	535	0.338725	36.76	52.2307
Irrigated	SR_2022	3	2	2	243	56	114.261	425	0.357091	32.12	58.5554
Irrigated	SR_2022	3	2	2	244	193	90.322	500	0.350769	34.44	60.9059
Irrigated	SR_2022	3	2	2	245	198	90.7455	375	0.393422	29.24	56.6211
Irrigated	SR_2022	3	2	2	246	111	65.6455	425	0.3052	23.16	59.1364
Irrigated	SR_2022	3	2	2	247	210	75.8365	375	0.354933	34.6	48.4046
Irrigated	SR_2022	3	2	2	248	95	83.1065	495	0.32588	27.6	51.6812
Irrigated	SR_2022	3	2	2	249	77	90.619	370	0.32495	28	53.4143
Irrigated	SR_2022	3	2	2	250	147	92.72	525	0.361733	29.72	48.2907
Irrigated	SR_2022	3	2	2	251	14	77.559	350	0.22155	52.2	47.41
Irrigated	SR_2022	3	2	2	252	154	48.473	325	0.233029	23.64	48.5279
Irrigated	SR_2022	3	2	2	253	215	71.1555	365	0.2828	34	51.3176
Irrigated	SR_2022	3	2	2	254	105	84.467	425	0.28635	33.32	44.5018
Irrigated	SR_2022	3	2	2	255	219	73.331	500	0.326764	28.72	51.1978
Irrigated	SR_2022	3	2	3	256	16	101.205	335	0.4006	39.44	44.6045
Irrigated	SR_2022	3	2	3	257	127	67.976	460	0.25475	23	49.687
Irrigated	SR_2022	3	2	3	258	53	102.03	390	0.39012	35.68	53.8901
Irrigated	SR_2022	3	2	3	259	64	113.178	450	0.35832	34.24	45.5374
Irrigated	SR_2022	3	2	3	260	224	77.393	375	0.215091	26.12	59.2802
Irrigated	SR_2022	3	2	3	261	205	108.264	415	0.369767	37.52	47.2814
Irrigated	SR_2022	3	2	3	262	168	77.323	425	0.28816	24.24	48.5479
Irrigated	SR_2022	3	2	3	263	79	85.0635	350	0.372044	28.96	51.8785
Irrigated	SR_2022	3	2	3	264	171	82.7745	315	0.2696	30.08	39.9601
Irrigated	SR_2022	3	2	3	265	200	98.2835	375	0.33165	31.56	43.5234
Irrigated	SR_2022	3	2	3	266	188	100.298	500	0.360109	28.84	58.1553
Irrigated	SR_2022	3	2	3	267	173	93.2075	475	0.361367	34.68	52.7566
Irrigated	SR_2022	3	2	3	268	169	109.557	475	0.378982	38.32	43.7578
Irrigated	SR_2022	3	2	3	269	158	87.7165	350	0.331771	24.28	51.5157
Irrigated	SR_2022	3	2	3	270	132	96.383	545	0.38572	33.76	42.9265
Irrigated	SR_2022	3	2	4	271	48	109.87	450	0.335867	35.08	47.6967
Irrigated	SR_2022	3	2	4	272	32	74.858	400	0.2307	27.68	52.052
Irrigated	SR_2022	3	2	4	273	21	112.648	325	0.25475	42.08	44.6958
Irrigated	SR_2022	3	2	4	274	217	79.0685	455	0.2916	32.72	56.4548
Irrigated	SR_2022	3	2	4	275	151	82.62	390	0.303111	37.08	58.4682
Irrigated	SR_2022	3	2	4	276	222	83.254	425	0.31836	18	56.6444
Irrigated	SR_2022	3	2	4	277	72	95.1135	505	0.3837	27.2	54.6471
Irrigated	SR_2022	3	2	4	278	40	99.2955	500	0.259867	28.32	54.322
Irrigated	SR_2022	3	2	4	279	67	105.216	660	0.354753	30.96	56.2532
Irrigated	SR_2022	3	2	4	280	146	82.1105	635	0.34536	23.4	61.3162
Irrigated	SR_2022	3	2	4	281	57	117.302	495	0.421345	33.32	48.2233
Irrigated	SR_2022	3	2	4	282	4	104.26	550	0.369943	30.92	52.6779
Irrigated	SR_2022	3	2	4	283	59	101.203	425	0.37088	38.84	47.7137
Irrigated	SR_2022	3	2	4	284	184	91.7165	350	0.276343	25.4	64.5197
Irrigated	SR_2022	3	2	4	285	35	88.255	475	0.284145	34.76	48.2854
Irrigated	SR_2022	3	2	5	286	34	83.9	325	0.315267	39.68	51.119
Irrigated	SR_2022	3	2	5	287	94	118.212	660	0.366024	30.68	50.4172
Irrigated	SR_2022	3	2	5	288	33	84.788	480	0.414171	27.44	48.5131
Irrigated	SR_2022	3	2	5	289	61	92.9975	390	0.338311	28.72	54.0808
Irrigated	SR_2022	3	2	5	290	185	105.277	510	0.373818	34.56	49.4676
Irrigated	SR_2022	3	2	5	291	13	86.677	465	0.346036	25.76	59.5963
Irrigated	SR_2022	3	2	5	292	12	83.5995	400	0.31476	37	46.8108
Irrigated	SR_2022	3	2	5	293	207	86.833	575	0.391425	21.32	65.8349
Irrigated	SR_2022	3	2	5	294	19	89.48	435	0.335543	25.68	40.3115
Irrigated	SR_2022	3	2	5	295	11	71.81	375	0.24225	24.28	53.9539
Irrigated	SR_2022	3	2	5	296	177	76.9315	525	0.3848	28.72	52.1309
Irrigated	SR_2022	3	2	5	297	9	80.562	400	0.31296	23.56	56.0272
Irrigated	SR_2022	3	2	5	298	71	71.889	400	0.31375	29.4	47.6599
Irrigated	SR_2022	3	2	5	299	30	69.107	415	0.3193	21.96	51.5118
Irrigated	SR_2022	3	2	5	300	66	79.7585	375	0.344	25.68	56.6511
Irrigated	SR_2022	3	2	6	301	128	69.6	445	0.351067	30	50.68
Irrigated	SR_2022	3	2	6	302	62	87.688	325	0.260571	27.36	48.4795
Irrigated	SR_2022	3	2	6	303	81	84.2715	320	0.32665	33.8	53.3728
Irrigated	SR_2022	3	2	6	304	5	91.3975	400	0.3376	24	53.3167
Irrigated	SR_2022	3	2	6	305	93	90.4415	445	0.35812	29.92	52.5401
Irrigated	SR_2022	3	2	6	306	141	76.812	380	0.311111	27.04	53.6095
Irrigated	SR_2022	3	2	6	307	39	64.4805	390	0.327657	22.48	57.4199
Irrigated	SR_2022	3	2	6	308	144	96.753	380	0.362667	33.6	51.7381
Irrigated	SR_2022	3	2	6	309	70	70.3045	425	0.300743	21.28	53.4962
Irrigated	SR_2022	3	2	6	310	206	94.1265	520	0.379855	33.08	39.9879
Irrigated	SR_2022	3	2	6	311	209	74.7295	375	0.27568	27.08	52.6883
Irrigated	SR_2022	3	2	6	312	74	79.434	395	0.344	29.2	54.6301
Irrigated	SR_2022	3	2	6	313	49	89.7785	375	0.32984	41.28	41.7733
Irrigated	SR_2022	3	2	6	314	47	101.169	350	0.3301	32.44	39.9014
Irrigated	SR_2022	3	2	6	315	27	90.383	515	0.35224	43.56	45.5464
Irrigated	SR_2022	3	2	7	316	108	103.081	405	0.394473	21.04	62.9848
Irrigated	SR_2022	3	2	7	317	221	94.097	440	0.32948	25.84	53.5139
Irrigated	SR_2022	3	2	7	318	176	72.447	435	0.32655	24.64	54.5942
Irrigated	SR_2022	3	2	7	319	65	126.457	510	0.401933	30.6	43.8824
Irrigated	SR_2022	3	2	7	320	167	90.9975	500	0.327382	26.88	51.9643
Irrigated	SR_2022	3	2	7	321	102	108.822	325	0.328533	28.2	45.6028
Irrigated	SR_2022	3	2	7	322	22	100.226	410	0.345345	44.76	44.2806
Irrigated	SR_2022	3	2	7	323	69	108.596	445	0.36912	34.28	52.077
Irrigated	SR_2022	3	2	7	324	51	110.293	500	0.380486	34.4	49.6279
Irrigated	SR_2022	3	2	7	325	24	93.8065	415	0.334218	27.64	56.7583
Irrigated	SR_2022	3	2	7	326	26	87.8685	445	0.269236	24.44	54.5499
Irrigated	SR_2022	3	2	7	327	15	88.2475	425	0.395257	28.24	50.6799
Irrigated	SR_2022	3	2	7	328	114	96.4875	440	0.406764	31.96	53.6796
Irrigated	SR_2022	3	2	7	329	163	92.9855	550	0.279164	34.48	55.6148
Irrigated	SR_2022	3	2	7	330	100	90.197	375	0.3015	26.64	58.018
Irrigated	SR_2022	3	2	8	331	84	94.0075	465	0.411	26.24	57.8506
Irrigated	SR_2022	3	2	8	332	149	96.407	400	0.3668	22.16	50.7581
Irrigated	SR_2022	3	2	8	333	80	93.097	415	0.3376	33.52	54.8687
Irrigated	SR_2022	3	2	8	334	174	93.6575	450	0.3944	21.92	52.9015
Irrigated	SR_2022	3	2	8	335	160	101.168	430	0.436	24.04	35.208
Irrigated	SR_2022	3	2	8	336	121	95.444	440	0.4108	24.16	52.5166
Irrigated	SR_2022	3	2	8	337	37	72.0165	385	0.289771	31.12	44.4987
Irrigated	SR_2022	3	2	8	338	145	97.187	425	0.3585	27.92	53.0659
Irrigated	SR_2022	3	2	8	339	225	96.636	360	0.50535	29.92	55.6818
Irrigated	SR_2022	3	2	8	340	153	81.798	540	0.454178	28.48	54.4522
Irrigated	SR_2022	3	2	8	341	214	91.825	545	0.3526	30.04	51.0652
Irrigated	SR_2022	3	2	8	342	208	90.347	435	0.395467	27.56	55.0943
Irrigated	SR_2022	3	2	8	343	2	96.142	400	0.34825	34.88	49.5298
Irrigated	SR_2022	3	2	8	344	23	82.714	390	0.509829	29.56	54.2084
Irrigated	SR_2022	3	2	8	345	88	88.6635	500	0.416	29.2	60.0959
Irrigated	SR_2022	3	2	9	346	181	80.9845	275	0.342867	27.2	56.2647
Irrigated	SR_2022	3	2	9	347	157	71.001	415	0.3338	34.32	50.4196
Irrigated	SR_2022	3	2	9	348	156	64.809	525	0.37252	24.16	54.7185
Irrigated	SR_2022	3	2	9	349	38	81.2745	460	0.3724	31.52	45.698
Irrigated	SR_2022	3	2	9	350	166	81.919	390	0.34	23.8	51.8992
Irrigated	SR_2022	3	2	9	351	190	78.358	300	0.35504	22.84	57.4081
Irrigated	SR_2022	3	2	9	352	112	75.595	375	0.4044	26.92	53.8484
Irrigated	SR_2022	3	2	9	353	123	83.663	445	0.371289	29.88	53.1727
Irrigated	SR_2022	3	2	9	354	55	98.1365	390	0.417778	36.72	47.6362
Irrigated	SR_2022	3	2	9	355	161	101.32	445	0.3942	33.92	56.4269
Irrigated	SR_2022	3	2	9	356	180	92.4905	425	0.3812	34.64	50.3118
Irrigated	SR_2022	3	2	9	357	96	92.7785	490	0.29835	32.92	55.7716
Irrigated	SR_2022	3	2	9	358	162	90.8215	440	0.369778	36.96	57.6082
Irrigated	SR_2022	3	2	9	359	118	97.3215	325	0.34175	43.56	62.5161
Irrigated	SR_2022	3	2	9	360	213	92.673	400	0.36416	29.6	57.3243
Irrigated	SR_2022	3	2	10	361	10	93.1965	545	0.381911	26.92	56.4636
Irrigated	SR_2022	3	2	10	362	131	93.9155	515	0.39584	33.8	52.4852
Irrigated	SR_2022	3	2	10	363	106	106.612	475	0.3876	32.68	50.1346
Irrigated	SR_2022	3	2	10	364	150	97.4275	575	0.441933	28.08	58.3618
Irrigated	SR_2022	3	2	10	365	36	99.1385	440	0.360171	23.32	59.5883
Irrigated	SR_2022	3	2	10	366	197	109.969	475	0.388714	27.4	63.2409
Irrigated	SR_2022	3	2	10	367	101	105.552	430	0.368255	32.32	55.4084
Irrigated	SR_2022	3	2	10	368	172	110.725	375	0.3294	42.56	40.9868
Irrigated	SR_2022	3	2	10	369	164	98.2695	735	0.402853	26.36	59.6662
Irrigated	SR_2022	3	2	10	370	75	110.252	640	0.449231	25.2	54.0317
Irrigated	SR_2022	3	2	10	371	41	98.5245	355	0.312267	27.28	51.6569
Irrigated	SR_2022	3	2	10	372	212	98.6135	375	0.339289	32.28	56.9145
Irrigated	SR_2022	3	2	10	373	116	100.416	525	0.420769	25.36	49.795
Irrigated	SR_2022	3	2	10	374	134	93.264	475	0.48384	28	56.1714
Irrigated	SR_2022	3	2	10	375	211	109.46	515	0.362633	43.04	46.8587
Irrigated	SR_2022	3	2	11	376	6	111.362	540	0.400615	35.4	47.4915
Irrigated	SR_2022	3	2	11	377	99	106.004	540	0.36184	33.72	47.0107
Irrigated	SR_2022	3	2	11	378	73	109.89	495	0.337273	43.48	50.644
Irrigated	SR_2022	3	2	11	379	103	108.381	680	0.385947	31.4	54.6369
Irrigated	SR_2022	3	2	11	380	97	114.29	410	0.28505	29.56	45.7104
Irrigated	SR_2022	3	2	11	381	85	108.79	475	0.38464	40	49.63
Irrigated	SR_2022	3	2	11	382	25	93.816	475	0.3034	37	43.7514
Irrigated	SR_2022	3	2	11	383	178	90.3335	625	0.335709	32.64	48.223
Irrigated	SR_2022	3	2	11	384	18	121.335	400	0.3318	46.76	45.9795
Irrigated	SR_2022	3	2	11	385	201	100.473	415	0.28125	31.48	54.9047
Irrigated	SR_2022	3	2	11	386	17	57.572	715	0.22012	14.56	58.8187
Irrigated	SR_2022	3	2	11	387	159	79.0415	375	0.30896	22.8	58.9298
Irrigated	SR_2022	3	2	11	388	195	87.8305	410	0.354667	33.4	50.0719
Irrigated	SR_2022	3	2	11	389	175	84.264	375	0.220867	30.28	49.0753
Irrigated	SR_2022	3	2	11	390	110	82.575	415	0.358844	29.84	47.9357
Irrigated	SR_2022	3	2	12	391	148	87.5685	285	0.315067	31.24	43.6748
Irrigated	SR_2022	3	2	12	392	87	110.267	490	0.382062	42.04	43.9391
Irrigated	SR_2022	3	2	12	393	191	98.5455	450	0.348222	32.32	46.4851
Irrigated	SR_2022	3	2	12	394	182	88.46	555	0.364436	24.84	54.7182
Irrigated	SR_2022	3	2	12	395	58	111.611	475	0.366467	30.92	54.6831
Irrigated	SR_2022	3	2	12	396	76	97.349	475	0.33535	34.76	51.6801
Irrigated	SR_2022	3	2	12	397	91	116.24	440	0.299636	32.36	46.2299
Irrigated	SR_2022	3	2	12	398	54	113.102	555	0.328031	38.6	52.2591
Irrigated	SR_2022	3	2	12	399	137	93.9855	475	0.341867	34.44	49.698
Irrigated	SR_2022	3	2	12	400	60	112.268	380	0.428533	28.56	57.535
Irrigated	SR_2022	3	2	12	401	165	81.68	325	0.2468	26.16	48.2875
Irrigated	SR_2022	3	2	12	402	86	64.998	890	0.3072	23.16	57.8929
Irrigated	SR_2022	3	2	12	403	130	75.3535	510	0.2688	25.92	54.0586
Irrigated	SR_2022	3	2	12	404	192	90.291	400	0.398844	25.68	56.1994
Irrigated	SR_2022	3	2	12	405	186	110.275	400	0.40955	29.84	45.0134
Irrigated	SR_2022	3	2	13	406	50	113.24	365	0.359556	32.72	53.6553
Irrigated	SR_2022	3	2	13	407	7	97.059	235	0.27632	24.32	52.0395
Irrigated	SR_2022	3	2	13	408	187	87.279	310	0.320667	26.76	56.0239
Irrigated	SR_2022	3	2	13	409	28	80.031	435	0.3344	26.76	50.4335
Irrigated	SR_2022	3	2	13	410	203	93.3025	300	0.306133	25.24	55.6735
Irrigated	SR_2022	3	2	13	411	170	114.175	305	0.3352	31.24	51.0243
Irrigated	SR_2022	3	2	13	412	216	80.626	325	0.336	27.6	48.8696
Irrigated	SR_2022	3	2	13	413	125	82.7085	465	0.34856	26.44	48.4569
Irrigated	SR_2022	3	2	13	414	78	88.3905	475	0.345382	29.88	50.6426
Irrigated	SR_2022	3	2	13	415	126	70.851	550	0.29225	24.16	55.5795
Irrigated	SR_2022	3	2	13	416	29	70.1975	480	0.278356	25.44	57.1069
Irrigated	SR_2022	3	2	13	417	8	91.823	425	0.33844	28.64	51.4665
Irrigated	SR_2022	3	2	13	418	194	101.915	425	0.351778	36.08	48.9357
Irrigated	SR_2022	3	2	13	419	120	96.4	375	0.2908	24.16	57.6821
Irrigated	SR_2022	3	2	13	420	31	81.1915	430	0.33224	29.28	55.6967
Irrigated	SR_2022	3	2	14	421	115	81.1805	500	0.324133	29.68	54.8248
Irrigated	SR_2022	3	2	14	422	63	109.723	425	0.454	37.32	46.7953
Irrigated	SR_2022	3	2	14	423	117	106.285	400	0.39924	31.68	51.6288
Irrigated	SR_2022	3	2	14	424	155	79.026	415	0.201829	19.16	52.6096
Irrigated	SR_2022	3	2	14	425	133	114.845	475	0.416444	31.88	47.9297
Irrigated	SR_2022	3	2	14	426	107	106.228	600	0.430246	30.08	46.1702
Irrigated	SR_2022	3	2	14	427	1	108.715	425	0.375927	31.6	51.7975
Irrigated	SR_2022	3	2	14	428	129	114.903	605	0.428533	31.88	49.5609
Irrigated	SR_2022	3	2	14	429	143	85.767	580	0.3498	31.76	41.4232
Irrigated	SR_2022	3	2	14	430	90	100.118	375	0.307511	25.16	52.7345
Irrigated	SR_2022	3	2	14	431	98	110.332	625	0.393367	38.92	44.851
Irrigated	SR_2022	3	2	14	432	142	96.178	460	0.3891	28.44	50.2672
Irrigated	SR_2022	3	2	14	433	46	88.6745	595	0.33872	36.4	48.1429
Irrigated	SR_2022	3	2	14	434	3	111.041	450	0.371891	29.28	45.8333
Irrigated	SR_2022	3	2	14	435	196	99.6315	445	0.295127	33.6	49.369
Irrigated	SR_2022	3	2	15	436	42	78.449	525	0.3338	25.52	50.5016
Irrigated	SR_2022	3	2	15	437	135	76.2925	450	0.36465	23.12	48.3045
Irrigated	SR_2022	3	2	15	438	152	97.2335	485	0.413556	33.08	50.3265
Irrigated	SR_2022	3	2	15	439	20	100.112	525	0.303345	28.44	54.5992
Irrigated	SR_2022	3	2	15	440	140	80.888	875	0.3413	26.16	46.4373
Irrigated	SR_2022	3	2	15	441	52	122.847	575	0.380708	49.04	47.4796
Irrigated	SR_2022	3	2	15	442	109	74.035	640	0.277378	25.36	44.6215
Irrigated	SR_2022	3	2	15	443	220	92.882	525	0.321422	35.72	50.7503
Irrigated	SR_2022	3	2	15	444	68	113.277	670	0.40252	36.6	43.6175
Irrigated	SR_2022	3	2	15	445	179	84.6235	540	0.34384	33.92	48.9505
Irrigated	SR_2022	3	2	15	446	183	90.223	485	0.296	29.92	57.5668
Irrigated	SR_2022	3	2	15	447	104	102.885	510	0.370267	24.84	47.343
Irrigated	SR_2022	3	2	15	448	83	81.149	765	0.345867	27.32	50.1025
Irrigated	SR_2022	3	2	15	449	218	87.4245	465	0.34172	32.8	52.5122
Irrigated	SR_2022	3	2	15	450	92	85.881	485	0.38272	33.88	49.5159
Irrigated	SR_2023	4	1	1	1	36	82.809	375	0.26644	31.96	43.5044
Irrigated	SR_2023	4	1	1	2	215	109.113	470	0.354836	32	51.1
Irrigated	SR_2023	4	1	1	3	49	119.621	465	0.334933	41.04	37.8752
Irrigated	SR_2023	4	1	1	4	102	107.405	475	0.35136	50.64	42.6461
Irrigated	SR_2023	4	1	1	5	151	71.2887	200	0.1902	30.76	56.1118
Irrigated	SR_2023	4	1	1	6	65	114.45	625	0.358588	35.96	47.8865
Irrigated	SR_2023	4	1	1	7	72	84.0883	410	0.335673	38.4	46.9479
Irrigated	SR_2023	4	1	1	8	93	93.2618	400	0.34276	37.2	54.4946
Irrigated	SR_2023	4	1	1	9	52	96.4271	450	0.3207	55.8	35.19
Irrigated	SR_2023	4	1	1	10	209	63.4468	320	0.270971	33.64	48.4067
Irrigated	SR_2023	4	1	1	11	109	48.4209	260	0.24416	27.48	50.0146
Irrigated	SR_2023	4	1	1	12	48	50.7684	400	0.3434	34.72	39.8502
Irrigated	SR_2023	4	1	1	13	111	29.7555	225	0.3046	19.24	47.6923
Irrigated	SR_2023	4	1	1	14	47	73.4748	385	0.27444	34.76	49.3441
Irrigated	SR_2023	4	1	1	15	188	53.3248	310	0.305257	31.28	49.4373
Irrigated	SR_2023	4	1	2	16	31	35.2209	325	0.3652	29.2	47.6986
Irrigated	SR_2023	4	1	2	17	70	48.7228	275	0.27	26.84	51.1326
Irrigated	SR_2023	4	1	2	18	44	56.0609	390	0.483867	32.36	47.8492
Irrigated	SR_2023	4	1	2	19	110	56.3234	305	0.320667	28.04	51.2268
Irrigated	SR_2023	4	1	2	20	106	66.5121	415	0.33572	34.48	50.2668
Irrigated	SR_2023	4	1	2	21	121	45.5876	320	0.3194	33.04	42.385
Irrigated	SR_2023	4	1	2	22	67	48.4448	290	0.18404	25.08	56.2998
Irrigated	SR_2023	4	1	2	23	63	55.1102	300	0.255314	31	45.8194
Irrigated	SR_2023	4	1	2	24	84	53.619	325	0.1644	26.48	50.2568
Irrigated	SR_2023	4	1	2	25	27	45.766	310	0.25904	21.84	56.3187
Irrigated	SR_2023	4	1	2	26	60	76.7897	425	0.367333	29.56	56.7118
Irrigated	SR_2023	4	1	2	27	129	68.5731	300	0.327943	35.84	42.3438
Irrigated	SR_2023	4	1	2	28	203	75.3508	350	0.322222	31.8	49.9748
Irrigated	SR_2023	4	1	2	29	79	62.9765	275	0.280667	29.08	51.6781
Irrigated	SR_2023	4	1	2	30	12	53.4388	275	0.33728	30.68	45.5932
Irrigated	SR_2023	4	1	3	31	136	57.6361	300	0.304857	29.16	45.6379
Irrigated	SR_2023	4	1	3	32	126	51.5445	375	0.2642	28.8	48.9167
Irrigated	SR_2023	4	1	3	33	144	68.1684	300	0.276267	43.36	44.179
Irrigated	SR_2023	4	1	3	34	19	65.4217	465	0.34024	30.12	52.5764
Irrigated	SR_2023	4	1	3	35	181	55.3492	260	0.314067	31.76	54.6348
Irrigated	SR_2023	4	1	3	36	83	61.1644	335	0.29815	30.44	50.5256
Irrigated	SR_2023	4	1	3	37	104	81.628	330	0.26408	43.2	43.6204
Irrigated	SR_2023	4	1	3	38	116	73.491	450	0.40152	36.56	44.2013
Irrigated	SR_2023	4	1	3	39	7	66.1874	360	0.3604	39.64	38.668
Irrigated	SR_2023	4	1	3	40	37	61.8961	425	0.323022	34.08	42.9108
Irrigated	SR_2023	4	1	3	41	189	87.5077	375	0.41045	24.76	57.8191
Irrigated	SR_2023	4	1	3	42	140	87.8419	475	0.387367	26.52	49.2911
Irrigated	SR_2023	4	1	3	43	208	97.965	480	0.446356	33.48	47.2282
Irrigated	SR_2023	4	1	3	44	135	86.016	425	0.33219	41.32	50.7357
Irrigated	SR_2023	4	1	3	45	146	84.7705	500	0.330123	30.16	54.8541
Irrigated	SR_2023	4	1	4	46	96	88.2539	600	0.395093	32.36	43.4363
Irrigated	SR_2023	4	1	4	47	183	90.6653	425	0.299133	42.92	44.6692
Irrigated	SR_2023	4	1	4	48	20	100.673	470	0.280523	32.92	47.9951
Irrigated	SR_2023	4	1	4	49	115	69.4561	475	0.346873	32.52	52.6691
Irrigated	SR_2023	4	1	4	50	78	76.1587	550	0.383314	32.72	44.7433
Irrigated	SR_2023	4	1	4	51	145	100.169	550	0.346	35.52	50.5068
Irrigated	SR_2023	4	1	4	52	43	81.6375	310	0.329771	41.12	40.4572
Irrigated	SR_2023	4	1	4	53	85	103.244	350	0.33	38.72	47.4174
Irrigated	SR_2023	4	1	4	54	14	84.6104	450	0.41423	47.92	40.4257
Irrigated	SR_2023	4	1	4	55	108	82.1423	295	0.40368	45.88	39.163
Irrigated	SR_2023	4	1	4	56	180	101.097	335	0.352756	37.88	52.7244
Irrigated	SR_2023	4	1	4	57	76	89.7467	450	0.52705	46.08	37.9688
Irrigated	SR_2023	4	1	4	58	178	94.2937	500	0.388	33.28	51.1178
Irrigated	SR_2023	4	1	4	59	25	88.3506	350	0.340444	44.84	37.8591
Irrigated	SR_2023	4	1	4	60	15	88.1288	400	0.47088	38.8	46.732
Irrigated	SR_2023	4	1	5	61	127	81.2677	290	0.35888	29.24	43.4884
Irrigated	SR_2023	4	1	5	62	132	112.738	415	0.398356	43.64	36.6911
Irrigated	SR_2023	4	1	5	63	160	120.611	300	0.32035	44.12	47.3164
Irrigated	SR_2023	4	1	5	64	177	92.3488	330	0.4531	44.2	41.0226
Irrigated	SR_2023	4	1	5	65	1	101.221	325	0.336044	37.88	44.2555
Irrigated	SR_2023	4	1	5	66	22	75.2863	300	0.3598	33.48	34.767
Irrigated	SR_2023	4	1	5	67	89	76.4127	310	0.340457	38.28	40.4911
Irrigated	SR_2023	4	1	5	68	223	79.8811	465	0.322967	31.32	53.41
Irrigated	SR_2023	4	1	5	69	166	81.9744	500	0.334486	34.28	52.8471
Irrigated	SR_2023	4	1	5	70	120	80.4221	335	0.301644	31.4	49.1338
Irrigated	SR_2023	4	1	5	71	157	76.6112	385	0.350618	39.64	43.8749
Irrigated	SR_2023	4	1	5	72	168	88.5502	365	0.3472	31.72	49.0164
Irrigated	SR_2023	4	1	5	73	90	69.3699	375	0.330655	31.88	57.3777
Irrigated	SR_2023	4	1	5	74	13	62.9253	350	0.355867	27.48	46.1135
Irrigated	SR_2023	4	1	5	75	162	63.0993	340	0.310844	36.48	50.3728
Irrigated	SR_2023	4	1	6	76	138	82.3314	425	0.306171	65.52	43.4676
Irrigated	SR_2023	4	1	6	77	156	62.3459	225	0.2631	28.12	46.9701
Irrigated	SR_2023	4	1	6	78	158	73.0856	355	0.405867	35.2	46.7841
Irrigated	SR_2023	4	1	6	79	167	84.8412	420	0.36804	33.64	47.4554
Irrigated	SR_2023	4	1	6	80	82	77.1845	310	0.390667	36.32	45.826
Irrigated	SR_2023	4	1	6	81	11	81.7848	425	0.389778	33.92	53.3608
Irrigated	SR_2023	4	1	6	82	17	59.8395	430	0.286356	27.52	50.6105
Irrigated	SR_2023	4	1	6	83	179	78.2058	400	0.3712	39.28	46.1711
Irrigated	SR_2023	4	1	6	84	186	105.537	450	0.403969	47.56	45.2986
Irrigated	SR_2023	4	1	6	85	55	103.407	475	0.378229	43.4	40.0553
Irrigated	SR_2023	4	1	6	86	51	133.288	550	0.43264	50.08	47.9393
Irrigated	SR_2023	4	1	6	87	94	100.905	475	0.364367	30.16	53.7401
Irrigated	SR_2023	4	1	6	88	34	84.2874	500	0.361971	32.48	49.5936
Irrigated	SR_2023	4	1	6	89	211	100.355	450	0.350523	36.36	46.2266
Irrigated	SR_2023	4	1	6	90	97	83.6875	550	0.413714	43.24	41.0453
Irrigated	SR_2023	4	1	7	91	165	79.9706	400	0.389422	39.4	41.3198
Irrigated	SR_2023	4	1	7	92	220	92.6808	450	0.317167	32.84	50.877
Irrigated	SR_2023	4	1	7	93	101	81.6097	275	0.293257	27.84	46.6667
Irrigated	SR_2023	4	1	7	94	195	98.5004	475	0.336255	45.76	43.8112
Irrigated	SR_2023	4	1	7	95	98	89.3475	500	0.384291	33.84	47.6241
Irrigated	SR_2023	4	1	7	96	87	103.123	515	0.4514	35.8	46.1564
Irrigated	SR_2023	4	1	7	97	99	96.893	670	0.367644	33.28	45.9615
Irrigated	SR_2023	4	1	7	98	214	97.0698	510	0.4104	35.56	46.6592
Irrigated	SR_2023	4	1	7	99	206	102.648	660	0.33715	44.36	37.2678
Irrigated	SR_2023	4	1	7	100	21	90.3	425	0.328773	50.92	44.6269
Irrigated	SR_2023	4	1	7	101	219	94.9342	470	0.3909	30.08	46.7819
Irrigated	SR_2023	4	1	7	102	152	91.0695	400	0.394222	39.8	48.4824
Irrigated	SR_2023	4	1	7	103	191	92.6502	260	0.339333	37.84	48.0655
Irrigated	SR_2023	4	1	7	104	41	81.6586	410	0.38984	35.16	51.4448
Irrigated	SR_2023	4	1	7	105	196	84.7683	450	0.356257	40.52	50.2665
Irrigated	SR_2023	4	1	8	106	182	103.173	325	0.21048	32.12	61.0336
Irrigated	SR_2023	4	1	8	107	39	86.2617	425	0.398727	29.6	53.8108
Irrigated	SR_2023	4	1	8	108	204	111.899	530	0.555867	31.76	47.2292
Irrigated	SR_2023	4	1	8	109	210	103.19	325	0.385714	39	48.6564
Irrigated	SR_2023	4	1	8	110	205	121.672	410	0.362167	39.76	45.9658
Irrigated	SR_2023	4	1	8	111	35	95.7877	500	0.406509	30.96	46.5245
Irrigated	SR_2023	4	1	8	112	213	92.5451	375	0.357956	36.12	57.5194
Irrigated	SR_2023	4	1	8	113	92	98.8701	425	0.426629	37.4	46.6096
Irrigated	SR_2023	4	1	8	114	176	78.8352	450	0.4102	29.44	48.0299
Irrigated	SR_2023	4	1	8	115	197	94.9815	425	0.35692	34.96	60.7208
Irrigated	SR_2023	4	1	8	116	123	104.698	400	0.414364	34.84	54.0758
Irrigated	SR_2023	4	1	8	117	114	110.006	425	0.375236	38.36	56.6528
Irrigated	SR_2023	4	1	8	118	88	108.651	375	0.377633	32.24	58.139
Irrigated	SR_2023	4	1	8	119	33	101.527	350	0.381289	44.12	44.6419
Irrigated	SR_2023	4	1	8	120	23	104.758	510	0.3746	41.16	46.414
Irrigated	SR_2023	4	1	9	121	190	105.123	475	0.305733	35.44	58.7472
Irrigated	SR_2023	4	1	9	122	128	91.2057	480	0.373891	35.12	47.3462
Irrigated	SR_2023	4	1	9	123	201	97.6336	275	0.26212	45.24	51.6976
Irrigated	SR_2023	4	1	9	124	74	75.8	375	0.323127	38.8	52.0103
Irrigated	SR_2023	4	1	9	125	66	85.2693	425	0.356567	30.6	57.0588
Irrigated	SR_2023	4	1	9	126	42	86.9595	300	0.3006	36.36	51.6282
Irrigated	SR_2023	4	1	9	127	45	89.5177	460	0.320667	39.16	49.8774
Irrigated	SR_2023	4	1	9	128	119	83.7392	450	0.437323	43.88	54.6673
Irrigated	SR_2023	4	1	9	129	212	98.2296	425	0.357333	36.4	57.9341
Irrigated	SR_2023	4	1	9	130	198	96.0851	400	0.3366	36.44	54.8847
Irrigated	SR_2023	4	1	9	131	163	98.3264	300	0.2844	54	47.6741
Irrigated	SR_2023	4	1	9	132	86	80.3064	500	0.249543	31.56	53.2573
Irrigated	SR_2023	4	1	9	133	193	102.828	440	0.2448	40.56	58.1657
Irrigated	SR_2023	4	1	9	134	173	104.185	350	0.315422	32	57.325
Irrigated	SR_2023	4	1	9	135	187	74.837	510	0.325787	33.8	55.4083
Irrigated	SR_2023	4	1	10	136	130	81.4679	335	0.342356	43.16	47.4699
Irrigated	SR_2023	4	1	10	137	58	113.112	475	0.324714	38.6	57.7513
Irrigated	SR_2023	4	1	10	138	29	78.6423	325	0.299314	27.52	46.5843
Irrigated	SR_2023	4	1	10	139	192	101.272	410	0.404727	44.72	51.9946
Irrigated	SR_2023	4	1	10	140	200	87.8636	340	0.3324	36.16	44.0265
Irrigated	SR_2023	4	1	10	141	56	101.065	450	0.336267	48.16	48.6877
Irrigated	SR_2023	4	1	10	142	170	120.226	425	0.366267	40.28	48.1132
Irrigated	SR_2023	4	1	10	143	150	76.6185	415	0.342655	34.48	55.4524
Irrigated	SR_2023	4	1	10	144	137	89.3859	355	0.34775	33.96	43.7102
Irrigated	SR_2023	4	1	10	145	95	83.2149	390	0.352145	30.36	51.1594
Irrigated	SR_2023	4	1	10	146	64	135.807	525	0.394123	37.16	44.6502
Irrigated	SR_2023	4	1	10	147	218	97.7698	375	0.2444	35.88	49.0747
Irrigated	SR_2023	4	1	10	148	169	94.4527	450	0.349673	44.92	39.7418
Irrigated	SR_2023	4	1	10	149	133	107.252	425	0.30576	37.44	54.0064
Irrigated	SR_2023	4	1	10	150	16	124.431	350	0.351236	61.64	40.4802
Irrigated	SR_2023	4	1	11	151	105	88.1266	350	0.27956	47.56	38.7889
Irrigated	SR_2023	4	1	11	152	8	73.3114	325	0.237314	32.84	43.8733
Irrigated	SR_2023	4	1	11	153	81	85.7118	350	0.292756	42.84	40.8123
Irrigated	SR_2023	4	1	11	154	69	114.911	625	0.4418	37.48	48.047
Irrigated	SR_2023	4	1	11	155	175	90.1354	360	0.3175	33.88	40.8973
Irrigated	SR_2023	4	1	11	156	142	61.1589	410	0.328892	42.92	50.4101
Irrigated	SR_2023	4	1	11	157	73	80.9931	425	0.377133	46.08	48.2378
Irrigated	SR_2023	4	1	11	158	172	89.4243	390	0.42636	44.4	34.018
Irrigated	SR_2023	4	1	11	159	71	81.2071	325	0.697733	27.48	46.4338
Irrigated	SR_2023	4	1	11	160	221	81.027	420	0.380909	28.84	56.2691
Irrigated	SR_2023	4	1	11	161	50	102.795	450	0.355877	41.76	47.0977
Irrigated	SR_2023	4	1	11	162	164	78.4811	340	0.334133	34.68	47.6932
Irrigated	SR_2023	4	1	11	163	57	97.3734	465	0.354771	38.52	45.8463
Irrigated	SR_2023	4	1	11	164	174	96.1491	350	0.38055	32.44	52.0222
Irrigated	SR_2023	4	1	11	165	54	96.2909	435	0.352255	45.88	49.6774
Irrigated	SR_2023	4	1	12	166	113	67.1314	400	0.327778	25.84	53.6378
Irrigated	SR_2023	4	1	12	167	103	103.81	450	0.373046	35.72	50.2128
Irrigated	SR_2023	4	1	12	168	199	92.5673	525	0.387771	35.48	52.0406
Irrigated	SR_2023	4	1	12	169	61	109.51	500	0.424769	29.84	51.6756
Irrigated	SR_2023	4	1	12	170	124	77.3124	325	0.267733	37.48	57.9189
Irrigated	SR_2023	4	1	12	171	171	109.799	450	0.374523	39.44	45.7302
Irrigated	SR_2023	4	1	12	172	139	87.6717	500	0.3928	36.8	48.7065
Irrigated	SR_2023	4	1	12	173	9	88.6503	450	0.338831	30.52	56.7628
Irrigated	SR_2023	4	1	12	174	207	89.6222	525	0.413231	41.76	39.8563
Irrigated	SR_2023	4	1	12	175	24	96.3453	550	0.3806	28.76	53.7135
Irrigated	SR_2023	4	1	12	176	46	85.9131	225	0.205467	24.04	46.2396
Irrigated	SR_2023	4	1	12	177	155	87.4288	425	0.318618	32.6	46.4294
Irrigated	SR_2023	4	1	12	178	68	110.257	740	0.447765	39.32	44.4964
Irrigated	SR_2023	4	1	12	179	148	99.0959	360	0.33548	36.44	49.8683
Irrigated	SR_2023	4	1	12	180	32	74.7659	300	0.2436	43.32	49.012
Irrigated	SR_2023	4	1	13	181	147	95.3824	550	0.415967	35.8	44.3799
Irrigated	SR_2023	4	1	13	182	141	72.6547	310	0.273911	38.68	51.8201
Irrigated	SR_2023	4	1	13	183	222	74.7036	375	0.33356	30.96	55.814
Irrigated	SR_2023	4	1	13	184	153	87.4427	425	0.446133	33.96	47.5029
Irrigated	SR_2023	4	1	13	185	40	80.6528	325	0.224356	30.52	49.9476
Irrigated	SR_2023	4	1	13	186	134	68.5392	350	0.321422	38.16	48.6373
Irrigated	SR_2023	4	1	13	187	6	84.929	425	0.306462	37	51.7838
Irrigated	SR_2023	4	1	13	188	91	89.3575	420	0.397422	36.56	43.4683
Irrigated	SR_2023	4	1	13	189	216	69.2665	350	0.239022	40.48	45.4743
Irrigated	SR_2023	4	1	13	190	2	94.3999	500	0.378457	36.16	51.3053
Irrigated	SR_2023	4	1	13	191	80	81.2839	450	0.319046	44.68	44.9866
Irrigated	SR_2023	4	1	13	192	100	86.4891	450	0.3533	28.72	50.9331
Irrigated	SR_2023	4	1	13	193	30	56.6631	325	0.3098	30.88	53.3161
Irrigated	SR_2023	4	1	13	194	161	84.6916	550	0.438057	46.32	43.1002
Irrigated	SR_2023	4	1	13	195	143	85.1403	425	0.40028	32.56	40.8231
Irrigated	SR_2023	4	1	14	196	18	93.6176	475	0.377877	46.28	41.452
Irrigated	SR_2023	4	1	14	197	3	87.6617	395	0.371511	36.12	47.6855
Irrigated	SR_2023	4	1	14	198	77	85.4744	425	0.409778	36.28	43.1202
Irrigated	SR_2023	4	1	14	199	117	88.9344	430	0.424	32.76	48.2784
Irrigated	SR_2023	4	1	14	200	4	109.754	450	0.356975	34.08	50.716
Irrigated	SR_2023	4	1	14	201	224	99.3333	410	0.464044	28.32	60.9605
Irrigated	SR_2023	4	1	14	202	38	85.5623	440	0.39092	43.52	41.5074
Irrigated	SR_2023	4	1	14	203	53	97.3178	110	0.322867	35.36	46.9005
Irrigated	SR_2023	4	1	14	204	122	93.7816	425	0.3288	38.12	52.5498
Irrigated	SR_2023	4	1	14	205	154	73.2352	430	0.29484	30.84	52.4903
Irrigated	SR_2023	4	1	14	206	185	112.088	450	0.38812	33.84	50.7683
Irrigated	SR_2023	4	1	14	207	26	101.584	375	0.309231	31.76	51.0705
Irrigated	SR_2023	4	1	14	208	112	105.439	365	0.271867	34.68	52.8604
Irrigated	SR_2023	4	1	14	209	59	124.452	565	0.37415	47.92	42.3122
Irrigated	SR_2023	4	1	14	210	107	111.226	460	0.368954	37.6	47.3936
Irrigated	SR_2023	4	1	15	211	125	86.1327	385	0.374933	36.32	50.4295
Irrigated	SR_2023	4	1	15	212	131	99.1404	525	0.404862	40.56	48.8363
Irrigated	SR_2023	4	1	15	213	10	78.9042	480	0.324756	26.56	51.3102
Irrigated	SR_2023	4	1	15	214	149	88.002	385	0.330044	33.16	46.4536
Irrigated	SR_2023	4	1	15	215	5	103.567	465	0.431745	22.24	53.9388
Irrigated	SR_2023	4	1	15	216	202	84.6877	550	0.3584	23.12	56.6782
Irrigated	SR_2023	4	1	15	217	194	86.9334	400	0.35925	32.12	46.9489
Irrigated	SR_2023	4	1	15	218	118	83.3766	300	0.327867	38.36	55.0678
Irrigated	SR_2023	4	1	15	219	184	79.5169	370	0.31944	26.32	58.2067
Irrigated	SR_2023	4	1	15	220	217	78.0029	400	0.3834	32	50.3125
Irrigated	SR_2023	4	1	15	221	159	77.4597	360	0.340691	34.56	56.0995
Irrigated	SR_2023	4	1	15	222	75	90.0664	500	0.379855	30.12	53.7052
Irrigated	SR_2023	4	1	15	223	62	112.445	480	0.414967	36.84	50.9229
Irrigated	SR_2023	4	1	15	224	225	104.217	450	0.350571	35.6	56.9775
Irrigated	SR_2023	4	1	15	225	28	91.5109	550	0.447455	27.48	46.3319
Irrigated	SR_2023	4	2	1	226	113	67.5896	300	0.301543	31.92	52.4687
Irrigated	SR_2023	4	2	1	227	204	101.291	550	0.3412	35.36	46.3914
Irrigated	SR_2023	4	2	1	228	138	79.1127	380	0.343378	32.6	49.8528
Irrigated	SR_2023	4	2	1	229	122	82.9697	375	0.339782	31.16	53.6842
Irrigated	SR_2023	4	2	1	230	43	80.8674	320	0.354343	34.12	48.5815
Irrigated	SR_2023	4	2	1	231	189	83.2332	315	0.285314	31.32	55.0064
Irrigated	SR_2023	4	2	1	232	136	71.3359	375	0.290889	33.16	48.9385
Irrigated	SR_2023	4	2	1	233	45	70.597	450	0.356509	34.96	49.9886
Irrigated	SR_2023	4	2	1	234	119	93.443	300	0.26645	39.72	47.6737
Irrigated	SR_2023	4	2	1	235	89	92.1931	425	0.407564	36.2	46.4862
Irrigated	SR_2023	4	2	1	236	202	74.7831	360	0.302444	22.64	56.4841
Irrigated	SR_2023	4	2	1	237	199	85.7152	400	0.31828	36.6	52.5355
Irrigated	SR_2023	4	2	1	238	124	84.0883	360	0.313236	35.4	55.6384
Irrigated	SR_2023	4	2	1	239	139	88.5391	410	0.36844	33.56	43.2896
Irrigated	SR_2023	4	2	1	240	44	93.7522	425	0.319067	37.04	50.1836
Irrigated	SR_2023	4	2	2	241	223	100.577	525	0.391867	32.64	53.1495
Irrigated	SR_2023	4	2	2	242	82	107.296	500	0.3288	39.08	50.4197
Irrigated	SR_2023	4	2	2	243	56	118.77	450	0.339967	25.52	53.5423
Irrigated	SR_2023	4	2	2	244	193	81.6425	425	0.355091	30.16	50.0531
Irrigated	SR_2023	4	2	2	245	198	49.9232	360	0.26332	36.6	50.3497
Irrigated	SR_2023	4	2	2	246	111	82.8245	360	0.259714	25.8	43.7209
Irrigated	SR_2023	4	2	2	247	210	101.218	310	0.2745	39.92	46.6633
Irrigated	SR_2023	4	2	2	248	95	97.35	450	0.340291	29.8	51.4362
Irrigated	SR_2023	4	2	2	249	77	104.571	425	0.353636	36.56	47.6149
Irrigated	SR_2023	4	2	2	250	147	104.726	500	0.3354	32.16	48.4328
Irrigated	SR_2023	4	2	2	251	14	105.925	300	0.324743	35.8	52.838
Irrigated	SR_2023	4	2	2	252	154	83.7692	400	0.249169	31	52.4645
Irrigated	SR_2023	4	2	2	253	215	93.5531	350	0.3576	38.68	50.8273
Irrigated	SR_2023	4	2	2	254	105	96.1257	260	0.24	46.6	37.6652
Irrigated	SR_2023	4	2	2	255	219	99.2043	325	0.240533	29.88	49.7055
Irrigated	SR_2023	4	2	3	256	16	111.238	375	0.351855	45.4	39.5771
Irrigated	SR_2023	4	2	3	257	127	74.0992	310	0.22375	24.48	45.7026
Irrigated	SR_2023	4	2	3	258	53	109.424	250	0.27032	32.6	50.6258
Irrigated	SR_2023	4	2	3	259	64	117.625	415	0.343644	36.88	41.4642
Irrigated	SR_2023	4	2	3	260	224	83.0942	375	0.300622	27.16	57.2312
Irrigated	SR_2023	4	2	3	261	205	116.603	360	0.3192	37.2	44.4946
Irrigated	SR_2023	4	2	3	262	168	97.394	325	0.2096	28.52	51.5708
Irrigated	SR_2023	4	2	3	263	79	95.9078	265	0.287143	38.12	52.1616
Irrigated	SR_2023	4	2	3	264	171	112.31	425	0.360567	43.8	44.5662
Irrigated	SR_2023	4	2	3	265	200	101.297	360	0.26665	33.8	40.8994
Irrigated	SR_2023	4	2	3	266	188	85.545	325	0.24132	37.36	48.4475
Irrigated	SR_2023	4	2	3	267	173	99.8115	370	0.328889	31.8	58.0755
Irrigated	SR_2023	4	2	3	268	169	97.0654	450	0.394836	43.28	39.9261
Irrigated	SR_2023	4	2	3	269	158	69.8797	400	0.3708	33.2	49.5542
Irrigated	SR_2023	4	2	3	270	132	87.7685	325	0.2832	49.04	39.0946
Irrigated	SR_2023	4	2	4	271	48	92.9615	275	0.2842	31.48	43.6341
Irrigated	SR_2023	4	2	4	272	32	66.0623	250	0.198133	27.24	50.5874
Irrigated	SR_2023	4	2	4	273	21	101.102	100	0.281033	43.96	41.0191
Irrigated	SR_2023	4	2	4	274	217	93.4886	310	0.3452	33.6	44.0952
Irrigated	SR_2023	4	2	4	275	151	79.394	390	0.428889	38.16	56.0273
Irrigated	SR_2023	4	2	4	276	222	79.7015	450	0.3257	31.72	53.3922
Irrigated	SR_2023	4	2	4	277	72	83.4039	400	0.37588	33.04	52.1792
Irrigated	SR_2023	4	2	4	278	40	91.6088	425	0.426327	36.64	47.3799
Irrigated	SR_2023	4	2	4	279	67	86.9011	450	0.3726	33.48	60.4062
Irrigated	SR_2023	4	2	4	280	146	80.2197	425	0.355378	25.76	60.3106
Irrigated	SR_2023	4	2	4	281	57	96.3887	375	0.346	42.36	45.4297
Irrigated	SR_2023	4	2	4	282	4	105.544	310	0.389911	50.76	42.1907
Irrigated	SR_2023	4	2	4	283	59	111.837	425	0.350067	50.24	40.1592
Irrigated	SR_2023	4	2	4	284	184	88.2394	350	0.3645	31.84	60.4774
Irrigated	SR_2023	4	2	4	285	35	100.995	400	0.434909	36.4	47.0879
Irrigated	SR_2023	4	2	5	286	34	70.2539	410	0.28912	34.96	49.5195
Irrigated	SR_2023	4	2	5	287	94	107.995	550	0.327771	40.08	50.5289
Irrigated	SR_2023	4	2	5	288	33	92.7402	550	0.385877	35.16	42.7531
Irrigated	SR_2023	4	2	5	289	61	116.949	475	0.370615	32.8	45.061
Irrigated	SR_2023	4	2	5	290	185	112.916	490	0.368364	32.28	44.0644
Irrigated	SR_2023	4	2	5	291	13	96.7379	450	0.3328	39.36	54.6037
Irrigated	SR_2023	4	2	5	292	12	82.0172	415	0.379362	35.84	41.2723
Irrigated	SR_2023	4	2	5	293	207	97.5925	525	0.42048	42.16	42.296
Irrigated	SR_2023	4	2	5	294	19	106.8	600	0.3683	31.32	53.0524
Irrigated	SR_2023	4	2	5	295	11	96.4805	565	0.465433	33.48	47.3477
Irrigated	SR_2023	4	2	5	296	177	87.4638	600	0.359046	31.72	44.6406
Irrigated	SR_2023	4	2	5	297	9	89.0145	445	0.0357846	29.72	58.3445
Irrigated	SR_2023	4	2	5	298	71	99.405	455	0.360655	29.84	47.8284
Irrigated	SR_2023	4	2	5	299	30	89.4209	450	0.25032	29.04	51.9421
Irrigated	SR_2023	4	2	5	300	66	111.38	525	0.362062	27.36	53.4503
Irrigated	SR_2023	4	2	6	301	128	79.4568	500	0.355673	37.08	42.3625
Irrigated	SR_2023	4	2	6	302	62	110.354	580	0.359323	42.36	43.4466
Irrigated	SR_2023	4	2	6	303	81	85.5918	350	0.3188	44.92	42.4666
Irrigated	SR_2023	4	2	6	304	5	107.303	600	0.430646	32.12	53.4869
Irrigated	SR_2023	4	2	6	305	93	103.629	425	0.32416	39.6	46.2525
Irrigated	SR_2023	4	2	6	306	141	77.4436	340	0.35015	39.16	48.8662
Irrigated	SR_2023	4	2	6	307	39	75.4831	325	0.311733	34.04	54.6063
Irrigated	SR_2023	4	2	6	308	144	92.7897	390	0.352044	39.56	44.1557
Irrigated	SR_2023	4	2	6	309	70	66.5365	455	0.32288	34.44	49.9187
Irrigated	SR_2023	4	2	6	310	206	98.2218	490	0.372036	46.76	38.7254
Irrigated	SR_2023	4	2	6	311	209	95.8905	325	0.28115	36.44	48.7596
Irrigated	SR_2023	4	2	6	312	74	74.2621	315	0.434	27.76	50
Irrigated	SR_2023	4	2	6	313	49	111.646	405	0.36776	37.6	42.6383
Irrigated	SR_2023	4	2	6	314	47	111.226	400	0.395782	37.84	40.8245
Irrigated	SR_2023	4	2	6	315	27	103.406	685	0.365571	27.96	59.8999
Irrigated	SR_2023	4	2	7	316	108	104.281	560	0.368029	32.96	48.2403
Irrigated	SR_2023	4	2	7	317	221	108.781	500	0.352708	30.24	51.4021
Irrigated	SR_2023	4	2	7	318	176	99.8487	550	0.400215	34.12	48.9683
Irrigated	SR_2023	4	2	7	319	65	144.523	695	0.271388	38.76	45.3973
Irrigated	SR_2023	4	2	7	320	167	118.404	600	0.416367	32.6	49.8896
Irrigated	SR_2023	4	2	7	321	102	115.239	450	0.4102	41.72	42.7517
Irrigated	SR_2023	4	2	7	322	22	133.726	420	0.389933	58.08	46.2534
Irrigated	SR_2023	4	2	7	323	69	117.471	475	0.390067	48.16	42.9983
Irrigated	SR_2023	4	2	7	324	51	150.687	550	0.398776	44.52	48.257
Irrigated	SR_2023	4	2	7	325	24	106.506	475	0.357491	25.52	58.4169
Irrigated	SR_2023	4	2	7	326	26	95.6737	425	0.42288	31	54.2323
Irrigated	SR_2023	4	2	7	327	15	92.9966	425	0.544756	38.88	48.3848
Irrigated	SR_2023	4	2	7	328	114	106.856	355	0.307782	37.6	53.4362
Irrigated	SR_2023	4	2	7	329	163	106.173	375	0.335564	59.44	37.214
Irrigated	SR_2023	4	2	7	330	100	97.7148	400	0.346364	33	52.3758
Irrigated	SR_2023	4	2	8	331	84	112.683	315	0.336533	47.04	39.932
Irrigated	SR_2023	4	2	8	332	149	101.815	325	0.354914	36.88	48.9154
Irrigated	SR_2023	4	2	8	333	80	96.9208	415	0.356039	35.56	48.8076
Irrigated	SR_2023	4	2	8	334	174	96.7985	350	0.347644	36.12	52.8904
Irrigated	SR_2023	4	2	8	335	160	117.752	375	0.356073	38.48	51.9023
Irrigated	SR_2023	4	2	8	336	121	81.4496	350	0.298889	39.92	42.7555
Irrigated	SR_2023	4	2	8	337	37	86.7126	355	0.299244	34.16	42.4473
Irrigated	SR_2023	4	2	8	338	145	89.3125	450	0.3707	33.08	49.734
Irrigated	SR_2023	4	2	8	339	225	97.2021	425	0.389257	34.6	57.8035
Irrigated	SR_2023	4	2	8	340	153	90.4167	375	0.334909	38.96	51.4374
Irrigated	SR_2023	4	2	8	341	214	92.6674	375	0.242933	30.76	54.6424
Irrigated	SR_2023	4	2	8	342	208	88.359	400	0.401378	35.24	50.9421
Irrigated	SR_2023	4	2	8	343	2	98.407	425	0.399	40	51.21
Irrigated	SR_2023	4	2	8	344	23	101.073	375	0.2508	44.16	40.9058
Irrigated	SR_2023	4	2	8	345	88	87.7307	275	0.2766	34.48	48.0278
Irrigated	SR_2023	4	2	9	346	181	94.2548	250	0.25315	39.24	48.5219
Irrigated	SR_2023	4	2	9	347	157	84.3802	365	0.315956	33.24	49.988
Irrigated	SR_2023	4	2	9	348	156	77.5637	410	0.34364	27.76	47.7233
Irrigated	SR_2023	4	2	9	349	38	102.042	1030	0.3235	41.72	43.0393
Irrigated	SR_2023	4	2	9	350	166	106.998	450	0.336333	35.16	46.0978
Irrigated	SR_2023	4	2	9	351	190	94.3276	375	0.34715	27.6	45.087
Irrigated	SR_2023	4	2	9	352	112	92.2671	405	0.34752	42.4	44.9057
Irrigated	SR_2023	4	2	9	353	123	94.118	475	0.359467	34.2	51.3801
Irrigated	SR_2023	4	2	9	354	55	115.488	500	0.4188	48.68	42.7362
Irrigated	SR_2023	4	2	9	355	161	93.7611	360	0.374533	41.8	42.1818
Irrigated	SR_2023	4	2	9	356	180	85.5567	375	0.3194	36.48	47.0833
Irrigated	SR_2023	4	2	9	357	96	81.7426	500	0.40508	30.96	51.5762
Irrigated	SR_2023	4	2	9	358	162	94.9553	525	0.386053	39.56	45.5612
Irrigated	SR_2023	4	2	9	359	118	88.2745	450	0.412182	39.96	48.3684
Irrigated	SR_2023	4	2	9	360	213	85.589	400	0.330109	40.76	46.7026
Irrigated	SR_2023	4	2	10	361	10	80.7746	460	0.331745	31.16	50.7702
Irrigated	SR_2023	4	2	10	362	131	94.7368	385	0.31816	35.36	50.181
Irrigated	SR_2023	4	2	10	363	106	83.4495	400	0.31304	34.08	48.8615
Irrigated	SR_2023	4	2	10	364	150	84.3474	525	0.403867	26.24	53.6128
Irrigated	SR_2023	4	2	10	365	36	80.3453	450	0.403111	32.56	53.2678
Irrigated	SR_2023	4	2	10	366	197	89.6444	425	0.371564	28.52	54.8808
Irrigated	SR_2023	4	2	10	367	101	94.5378	500	0.361236	31.36	54.8214
Irrigated	SR_2023	4	2	10	368	172	109.291	480	0.46772	40.28	96.0576
Irrigated	SR_2023	4	2	10	369	164	87.7157	365	0.285127	52.2	36.1762
Irrigated	SR_2023	4	2	10	370	75	62.8575	465	0.4336	26.56	56.9428
Irrigated	SR_2023	4	2	10	371	41	77.5042	435	0.38144	29.76	51.8817
Irrigated	SR_2023	4	2	10	372	212	94.8013	450	0.342533	32.4	57.1605
Irrigated	SR_2023	4	2	10	373	116	100.171	500	0.372833	33	54.2788
Irrigated	SR_2023	4	2	10	374	134	104.92	380	0.428844	32.68	53.317
Irrigated	SR_2023	4	2	10	375	211	125.751	610	0.397882	37.8	46.1481
Irrigated	SR_2023	4	2	11	376	6	111.257	485	0.431446	42.52	50.6115
Irrigated	SR_2023	4	2	11	377	99	101.67	560	0.382829	27.56	47.3295
Irrigated	SR_2023	4	2	11	378	73	89.8324	350	0.411429	38.84	42.9351
Irrigated	SR_2023	4	2	11	379	103	99.5807	450	0.378145	33.32	51.6567
Irrigated	SR_2023	4	2	11	380	97	99.0264	475	0.392923	35.24	48.0704
Irrigated	SR_2023	4	2	11	381	85	90.4201	530	0.439636	34.36	43.4924
Irrigated	SR_2023	4	2	11	382	25	75.9374	400	0.334533	36.68	36.5431
Irrigated	SR_2023	4	2	11	383	178	79.9283	525	0.349785	29.04	50.7989
Irrigated	SR_2023	4	2	11	384	18	89.7356	425	0.3416	53.24	42.0811
Irrigated	SR_2023	4	2	11	385	201	81.216	410	0.3564	20	43.24
Irrigated	SR_2023	4	2	11	386	17	62.3326	435	0.306667	29.28	43.8388
Irrigated	SR_2023	4	2	11	387	159	63.1749	300	0.272914	27.24	59.442
Irrigated	SR_2023	4	2	11	388	195	83.7992	475	0.404	34.92	47.9725
Irrigated	SR_2023	4	2	11	389	175	86.4736	450	0.397673	30.52	51.0092
Irrigated	SR_2023	4	2	11	390	110	74.8576	475	0.396711	31.44	40.8397
Irrigated	SR_2023	4	2	12	391	148	97.4935	485	0.439815	37.04	51.3391
Irrigated	SR_2023	4	2	12	392	87	112.819	600	0.388343	40.76	45.3386
Irrigated	SR_2023	4	2	12	393	191	96.0573	420	0.352873	35.88	49.7324
Irrigated	SR_2023	4	2	12	394	182	95.9311	500	0.334677	27.88	58.264
Irrigated	SR_2023	4	2	12	395	58	100.443	475	0.339138	34.92	47.3196
Irrigated	SR_2023	4	2	12	396	76	69.0891	525	0.248907	33.72	40.6524
Irrigated	SR_2023	4	2	12	397	91	102.914	675	0.41712	41.08	40.4674
Irrigated	SR_2023	4	2	12	398	54	106.004	410	0.317415	43.88	48.66
Irrigated	SR_2023	4	2	12	399	137	108.389	575	0.431947	36.68	47.3937
Irrigated	SR_2023	4	2	12	400	60	135.647	515	0.387953	37.64	56.1211
Irrigated	SR_2023	4	2	12	401	165	96.1352	500	0.343855	30.28	48.2034
Irrigated	SR_2023	4	2	12	402	86	74.2043	360	0.454533	27.56	54.1945
Irrigated	SR_2023	4	2	12	403	130	80.0757	475	0.358145	29.72	50.7672
Irrigated	SR_2023	4	2	12	404	192	90.4328	375	0.3274	34.44	49.5238
Irrigated	SR_2023	4	2	12	405	186	106.03	375	0.2726	42.84	43.7628
Irrigated	SR_2023	4	2	13	406	50	101.4	500	0.371323	34.4	50.0814
Irrigated	SR_2023	4	2	13	407	7	84.2106	500	0.361477	31.68	63.2576
Irrigated	SR_2023	4	2	13	408	187	85.4216	480	0.399455	24.16	50.5132
Irrigated	SR_2023	4	2	13	409	28	93.4263	625	0.287543	29.4	49.9184
Irrigated	SR_2023	4	2	13	410	203	110.615	325	0.2643	37.08	60.6149
Irrigated	SR_2023	4	2	13	411	170	118.033	450	0.363167	39.04	44.0061
Irrigated	SR_2023	4	2	13	412	216	86.2284	450	0.377564	33.32	46.8667
Irrigated	SR_2023	4	2	13	413	125	76.197	445	0.336436	38.24	42.8138
Irrigated	SR_2023	4	2	13	414	78	88.2461	350	0.29492	40.28	55.0447
Irrigated	SR_2023	4	2	13	415	126	61.4158	460	0.26432	27.88	46.6571
Irrigated	SR_2023	4	2	13	416	29	78.3454	550	0.276187	30.36	52.0685
Irrigated	SR_2023	4	2	13	417	8	81.2433	375	0.279491	41.44	51.4961
Irrigated	SR_2023	4	2	13	418	194	85.728	425	0.338545	33.8	52.9822
Irrigated	SR_2023	4	2	13	419	120	73.9891	300	0.274222	37.44	49.188
Irrigated	SR_2023	4	2	13	420	31	59.5448	425	0.30844	34.32	52.2611
Irrigated	SR_2023	4	2	14	421	115	63.8188	400	0.26565	27.96	55.3505
Irrigated	SR_2023	4	2	14	422	63	90.8571	460	0.3692	38.08	48.9391
Irrigated	SR_2023	4	2	14	423	117	80.8524	440	0.347855	31.96	53.2165
Irrigated	SR_2023	4	2	14	424	155	80.1379	450	0.36428	28.72	54.6797
Irrigated	SR_2023	4	2	14	425	133	112.438	525	0.3848	39.28	42.9837
Irrigated	SR_2023	4	2	14	426	107	94.8608	425	0.38064	31.12	51.3753
Irrigated	SR_2023	4	2	14	427	1	80.1891	350	0.340089	25.6	55.8281
Irrigated	SR_2023	4	2	14	428	129	68.6932	335	0.380171	39.04	49.1393
Irrigated	SR_2023	4	2	14	429	143	65.2205	325	0.236467	34.36	40.2328
Irrigated	SR_2023	4	2	14	430	90	82.3202	300	0.2959	24.8	58.7097
Irrigated	SR_2023	4	2	14	431	98	87.7385	360	0.38005	38.52	45.7113
Irrigated	SR_2023	4	2	14	432	142	80.8152	340	0.296667	37.16	52.4865
Irrigated	SR_2023	4	2	14	433	46	80.8463	300	0.2654	30.96	54.2506
Irrigated	SR_2023	4	2	14	434	3	91.2724	400	0.41256	34.28	50.7001
Irrigated	SR_2023	4	2	14	435	196	78.3304	315	0.4864	27.8	53.2662
Irrigated	SR_2023	4	2	15	436	42	60.7986	275	0.308	29.36	44.5504
Irrigated	SR_2023	4	2	15	437	135	67.0514	310	0.267771	33.44	50.3589
Irrigated	SR_2023	4	2	15	438	152	84.919	350	0.37705	37.52	45.7463
Irrigated	SR_2023	4	2	15	439	20	86.3524	475	0.365567	24.44	49.8036
Irrigated	SR_2023	4	2	15	440	140	70.9056	300	0.305733	16.4	49.8049
Irrigated	SR_2023	4	2	15	441	52	112.47	380	0.423822	35.48	49.0304
Irrigated	SR_2023	4	2	15	442	109	83.7731	410	0.344889	32.4	40.8765
Irrigated	SR_2023	4	2	15	443	220	97.8504	610	0.3468	31.08	52.574
Irrigated	SR_2023	4	2	15	444	68	100.713	350	0.283378	27.96	55.2504
Irrigated	SR_2023	4	2	15	445	179	82.9852	455	0.372255	31.8	45.4969
Irrigated	SR_2023	4	2	15	446	183	94.0024	425	0.294633	29.36	53.5422
Irrigated	SR_2023	4	2	15	447	104	101.245	400	0.3763	36.96	48.7771
Irrigated	SR_2023	4	2	15	448	83	85.8447	365	0.32835	29.68	48.9218
Irrigated	SR_2023	4	2	15	449	218	96.2797	375	0.291236	35.44	54.8081
Irrigated	SR_2023	4	2	15	450	92	111.451	450	0.422182	45.36	43.5714
Rainfed	LT_2022	5	1	1	1	36	31.767	230	0.106	8.84	34.1176
Rainfed	LT_2022	5	1	1	2	215	37.6145	230	0.163816	9.2	42.7826
Rainfed	LT_2022	5	1	1	3	49	39.8085	140	0.0358	10	39.52
Rainfed	LT_2022	5	1	1	4	102	27.8395	210	0.1318	12	40.6667
Rainfed	LT_2022	5	1	1	5	151	18.4225	200	0.145	12	37.3333
Rainfed	LT_2022	5	1	1	6	65	41.051	350	0.2223	16	24.475
Rainfed	LT_2022	5	1	1	7	72	14.1525	220	0.1552	14.04	37.8632
Rainfed	LT_2022	5	1	1	8	93	16.81	225	0.21	14.08	37.5
Rainfed	LT_2022	5	1	1	9	52	23.759	345	0.152933	8.04	33.3831
Rainfed	LT_2022	5	1	1	10	209	27.299	355	0.17552	18.64	43.0043
Rainfed	LT_2022	5	1	1	11	109	18.206	270	0.0682667	7.2	33.3333
Rainfed	LT_2022	5	1	1	12	48	17.9525	275	0.109067	9.04	34.823
Rainfed	LT_2022	5	1	1	13	111	15.704	215	0.1128	13.28	44.0361
Rainfed	LT_2022	5	1	1	14	47	39.8105	280	0.1812	11.68	27.8082
Rainfed	LT_2022	5	1	1	15	188	37.085	270	0.1645	12.2	38.5246
Rainfed	LT_2022	5	1	2	16	31	17.7725	310	0.1008	4.88	40.082
Rainfed	LT_2022	5	1	2	17	70	12.5485	150	0.1082	16.92	34.4208
Rainfed	LT_2022	5	1	2	18	44	31.909	240	0.1126	10.24	35.3516
Rainfed	LT_2022	5	1	2	19	110	17.549	225	0.0192	4.16	29.0385
Rainfed	LT_2022	5	1	2	20	106	17.601	310	0.160933	9.92	30.0403
Rainfed	LT_2022	5	1	2	21	121	17.1235	255	0.1078	8.88	22.8829
Rainfed	LT_2022	5	1	2	22	67	18.753	280	0.1484	10.24	38.7891
Rainfed	LT_2022	5	1	2	23	63	24.6385	365	0.1136	10.12	32.6087
Rainfed	LT_2022	5	1	2	24	84	22.765	240	0.0641333	12.56	41.3694
Rainfed	LT_2022	5	1	2	25	27	28.991	310	0.127733	6.4	45.25
Rainfed	LT_2022	5	1	2	26	60	17.909	270	0.185867	10.72	28.8806
Rainfed	LT_2022	5	1	2	27	129	9.4185	210	0.1554	9.8	37.1429
Rainfed	LT_2022	5	1	2	28	203	21.714	270	0.1247	15.68	32.6786
Rainfed	LT_2022	5	1	2	29	79	24.977	300	0.2212	18	39.8889
Rainfed	LT_2022	5	1	2	30	12	37.4985	265	0.1148	23.76	35.1178
Rainfed	LT_2022	5	1	3	31	136	9.14	300	0.0310667	11.36	33.3451
Rainfed	LT_2022	5	1	3	32	126	22.399	360	0.16896	15.76	37.7157
Rainfed	LT_2022	5	1	3	33	144	21.8	350	0.2455	18.08	31.969
Rainfed	LT_2022	5	1	3	34	19	19.4725	260	0.25	16.4	32.8049
Rainfed	LT_2022	5	1	3	35	181	17.896	300	0.16456	15.64	29.0281
Rainfed	LT_2022	5	1	3	36	83	31.9025	325	0.168667	18.16	30.6167
Rainfed	LT_2022	5	1	3	37	104	12.521	265	0.1306	16.4	26.4878
Rainfed	LT_2022	5	1	3	38	116	21.3755	150	0.0796	5.2	31
Rainfed	LT_2022	5	1	3	39	7	12.6615	225	0.150133	17.28	34.6528
Rainfed	LT_2022	5	1	3	40	37	23.0285	210	0.1658	14.48	27.0166
Rainfed	LT_2022	5	1	3	41	189	16.9305	250	0.129333	11.84	36.8581
Rainfed	LT_2022	5	1	3	42	140	28.745	250	0.072	11.84	34.7973
Rainfed	LT_2022	5	1	3	43	208	39.3725	175	0.125	16.76	36.2768
Rainfed	LT_2022	5	1	3	44	135	24.409	290	0.143467	13.16	37.7508
Rainfed	LT_2022	5	1	3	45	146	34.9755	235	0.207467	14.64	42.2131
Rainfed	LT_2022	5	1	4	46	96	25.802	280	0.1136	13.68	29.2982
Rainfed	LT_2022	5	1	4	47	183	19.132	270	0.176667	11.68	35.5822
Rainfed	LT_2022	5	1	4	48	20	19.776	300	0.0906667	10.04	32.749
Rainfed	LT_2022	5	1	4	49	115	16.68	280	0.15576	9.24	35.1948
Rainfed	LT_2022	5	1	4	50	78	14.2645	325	0.24968	18.96	47.6371
Rainfed	LT_2022	5	1	4	51	145	23.1915	375	0.221487	20.6	39.1068
Rainfed	LT_2022	5	1	4	52	43	23.265	405	0.2731	28.16	40.0284
Rainfed	LT_2022	5	1	4	53	85	26.9875	480	0.255333	21.16	33.6484
Rainfed	LT_2022	5	1	4	54	14	22.8395	400	0.292171	24.24	33.2673
Rainfed	LT_2022	5	1	4	55	108	24.98	560	0.294533	23.76	27.4916
Rainfed	LT_2022	5	1	4	56	180	29.904	435	0.267	23.32	38.0446
Rainfed	LT_2022	5	1	4	57	76	17.9675	465	0.246356	24.32	44.2763
Rainfed	LT_2022	5	1	4	58	178	22.508	450	0.18928	23.96	43.9733
Rainfed	LT_2022	5	1	4	59	25	18.938	360	0.222267	18.6	34.2366
Rainfed	LT_2022	5	1	4	60	15	15.724	415	0.273429	20.16	43.9087
Rainfed	LT_2022	5	1	5	61	127	23.095	250	0.2012	15.44	40.9585
Rainfed	LT_2022	5	1	5	62	132	19.491	405	0.25728	18.68	36.7452
Rainfed	LT_2022	5	1	5	63	160	32.306	220	0.1165	22.24	35.018
Rainfed	LT_2022	5	1	5	64	177	16.8765	230	0.148	18.6	38.5591
Rainfed	LT_2022	5	1	5	65	1	18.328	125	0.146	9.44	37.1186
Rainfed	LT_2022	5	1	5	66	22	18.7395	350	0.0728	15.56	25.7326
Rainfed	LT_2022	5	1	5	67	89	12.9285	325	0.1912	20.64	35.2132
Rainfed	LT_2022	5	1	5	68	223	19.2935	425	0.19136	9.04	46.2389
Rainfed	LT_2022	5	1	5	69	166	19.8615	225	0.0918	17.6	45.5682
Rainfed	LT_2022	5	1	5	70	120	8.9	315	0.2055	10.04	33.6653
Rainfed	LT_2022	5	1	5	71	157	18.2465	250	0.0919	12.08	45.4967
Rainfed	LT_2022	5	1	5	72	168	21.518	150	0.0368	7.64	31.5183
Rainfed	LT_2022	5	1	5	73	90	22.947	180	0.093	3.92	38.6735
Rainfed	LT_2022	5	1	5	74	13	23.411	220	0.06	10.12	34.4664
Rainfed	LT_2022	5	1	5	75	162	28.839	200	0.144533	17	38.6824
Rainfed	LT_2022	5	1	6	76	138	32.907	315	0.137867	15.96	33.3333
Rainfed	LT_2022	5	1	6	77	156	35.6375	210	0.130667	9.36	36.1111
Rainfed	LT_2022	5	1	6	78	158	23.782	200	0.1102	15.92	31.7337
Rainfed	LT_2022	5	1	6	79	167	21.853	225	0.1713	16.44	39.9757
Rainfed	LT_2022	5	1	6	80	82	34.6735	325	0.0749143	8.88	37.6577
Rainfed	LT_2022	5	1	6	81	11	14.1185	275	0.136	14.48	33.6188
Rainfed	LT_2022	5	1	6	82	17	24.27	385	0.2051	12.88	36.9255
Rainfed	LT_2022	5	1	6	83	179	19.4515	310	0.21032	14.24	32.9775
Rainfed	LT_2022	5	1	6	84	186	12.809	205	0.0596	14.12	23.2578
Rainfed	LT_2022	5	1	6	85	55	25.0815	370	0.1674	17.52	24.0183
Rainfed	LT_2022	5	1	6	86	51	14.4565	215	0.0750667	19.52	26.6393
Rainfed	LT_2022	5	1	6	87	94	11.469	310	0.1868	18.32	27.7293
Rainfed	LT_2022	5	1	6	88	34	25.941	375	0.1505	13.88	42.5648
Rainfed	LT_2022	5	1	6	89	211	29.8405	290	0.1293	17.52	30.5479
Rainfed	LT_2022	5	1	6	90	97	20.645	300	0.1753	19.6	21.1633
Rainfed	LT_2022	5	1	7	91	165	28.292	210	0.2562	11.88	35.4545
Rainfed	LT_2022	5	1	7	92	220	16.147	295	0.1008	5.16	37.8295
Rainfed	LT_2022	5	1	7	93	101	13.794	210	0.143333	13.72	33.9067
Rainfed	LT_2022	5	1	7	94	195	18.7915	250	0.0790667	7.68	33.3333
Rainfed	LT_2022	5	1	7	95	98	20.5675	310	0.12032	14.48	32.6243
Rainfed	LT_2022	5	1	7	96	87	21.045	350	0.0157333	1.6	30.5
Rainfed	LT_2022	5	1	7	97	99	17.6245	200	0.0788	14.56	31.7308
Rainfed	LT_2022	5	1	7	98	214	26.4995	225	0.1728	10	35.4
Rainfed	LT_2022	5	1	7	99	206	25.684	250	0.0976	7.76	24.7423
Rainfed	LT_2022	5	1	7	100	21	35.1965	265	0.0744	6.2	34.5161
Rainfed	LT_2022	5	1	7	101	219	18.9195	140	0.0408	12.2	37.2131
Rainfed	LT_2022	5	1	7	102	152	16.246	250	0.124667	13.24	30.423
Rainfed	LT_2022	5	1	7	103	191	26.227	125	0.294	10.12	30.3953
Rainfed	LT_2022	5	1	7	104	41	21.2105	150	0.0956	1.76	30
Rainfed	LT_2022	5	1	7	105	196	21.5075	240	0.106	10.72	31.1567
Rainfed	LT_2022	5	1	8	106	182	14.967	180	0.0646	3.32	37.4699
Rainfed	LT_2022	5	1	8	107	39	33.432	215	0.108267	9.16	37.2052
Rainfed	LT_2022	5	1	8	108	204	23.7285	240	0.1836	14.12	35.0992
Rainfed	LT_2022	5	1	8	109	210	19.6795	250	0.08168	15.84	28.7374
Rainfed	LT_2022	5	1	8	110	205	8.9445	200	0.092	2.56	27.9688
Rainfed	LT_2022	5	1	8	111	35	25.544	135	0.147	13.4	35.9104
Rainfed	LT_2022	5	1	8	112	213	10.354	150	0.095	3.92	44.1837
Rainfed	LT_2022	5	1	8	113	92	27.06	150	0.0712	9.04	33.8053
Rainfed	LT_2022	5	1	8	114	176	21.0215	225	0.1292	13.52	38.4911
Rainfed	LT_2022	5	1	8	115	197	19.1695	215	0.05016	15.12	40
Rainfed	LT_2022	5	1	8	116	123	17.858	310	0.0521333	7.4	39.1892
Rainfed	LT_2022	5	1	8	117	114	43.2355	200	0.0436	12.08	44.5033
Rainfed	LT_2022	5	1	8	118	88	35.823	140	0.0324	12.84	44.6729
Rainfed	LT_2022	5	1	8	119	33	30.458	240	0.1021	10.96	36.3139
Rainfed	LT_2022	5	1	8	120	23	16.086	165	0.0746	7.44	45.6452
Rainfed	LT_2022	5	1	9	121	190	12.715	305	0.21448	17.6	36.3409
Rainfed	LT_2022	5	1	9	122	128	32.508	365	0.2989	20.96	29.1412
Rainfed	LT_2022	5	1	9	123	201	20.747	385	0.1432	10.92	40.4396
Rainfed	LT_2022	5	1	9	124	74	34.889	540	0.233267	17	33.6235
Rainfed	LT_2022	5	1	9	125	66	25.047	335	0.0663	10.36	34.0154
Rainfed	LT_2022	5	1	9	126	42	20.296	340	0.121533	11.6	42.0345
Rainfed	LT_2022	5	1	9	127	45	23.62	400	0.226667	11	43.2727
Rainfed	LT_2022	5	1	9	128	119	19.416	215	0.0957	15.28	33.377
Rainfed	LT_2022	5	1	9	129	212	30.2005	350	0.0758667	12.84	42.4611
Rainfed	LT_2022	5	1	9	130	198	21.8785	125	0.167	13.12	31.1585
Rainfed	LT_2022	5	1	9	131	163	32.9575	260	0.0936	11.36	33.9085
Rainfed	LT_2022	5	1	9	132	86	24.5055	280	0.0948	4.52	36.5487
Rainfed	LT_2022	5	1	9	133	193	35.7845	215	0.0349	4.04	41.5842
Rainfed	LT_2022	5	1	9	134	173	42.4885	300	0.04536	1.44	44.4444
Rainfed	LT_2022	5	1	9	135	187	21.6345	225	0.1599	8.08	38.1188
Rainfed	LT_2022	5	1	10	136	130	17.7875	260	0.1588	16.6	39.4458
Rainfed	LT_2022	5	1	10	137	58	21.384	325	0.1396	21.88	30.6033
Rainfed	LT_2022	5	1	10	138	29	91.485	350	0.242	22	24.4545
Rainfed	LT_2022	5	1	10	139	192	31.981	255	0.1214	19.64	32.5458
Rainfed	LT_2022	5	1	10	140	200	19.3905	375	0.105357	15.36	27.5
Rainfed	LT_2022	5	1	10	141	56	24.6105	310	0.0812	15.44	26.2176
Rainfed	LT_2022	5	1	10	142	170	24.277	340	0.189067	14.72	26.7935
Rainfed	LT_2022	5	1	10	143	150	45.4035	320	0.18656	12.2	38.5246
Rainfed	LT_2022	5	1	10	144	137	17.3705	350	0.1408	14.08	29.3466
Rainfed	LT_2022	5	1	10	145	95	29.198	305	0.134667	19.16	32.9019
Rainfed	LT_2022	5	1	10	146	64	14.4545	310	0.0981	18.88	22.839
Rainfed	LT_2022	5	1	10	147	218	29.157	290	0.1708	22.48	28.1673
Rainfed	LT_2022	5	1	10	148	169	17.1625	215	0.0541333	24.64	20.6006
Rainfed	LT_2022	5	1	10	149	133	21.8685	330	0.282	23.84	22.9362
Rainfed	LT_2022	5	1	10	150	16	28.992	420	0.2631	18.68	19.3362
Rainfed	LT_2022	5	1	11	151	105	18.9775	425	0.1428	12.32	31.4935
Rainfed	LT_2022	5	1	11	152	8	24.6785	230	0.138	16.52	31.8886
Rainfed	LT_2022	5	1	11	153	81	27.5735	270	0.180667	17.36	26.3134
Rainfed	LT_2022	5	1	11	154	69	26.8615	330	0.1494	15.44	31.8394
Rainfed	LT_2022	5	1	11	155	175	32.9945	375	0.2724	9.76	30.5738
Rainfed	LT_2022	5	1	11	156	142	10.7715	290	0.156533	12.92	37.7399
Rainfed	LT_2022	5	1	11	157	73	16.001	360	0.1815	16.92	30.4255
Rainfed	LT_2022	5	1	11	158	172	18.4485	340	0.1628	18.48	21.1255
Rainfed	LT_2022	5	1	11	159	71	20.3295	290	0.243867	15.64	30.179
Rainfed	LT_2022	5	1	11	160	221	22.918	240	0.1068	18.72	28.8889
Rainfed	LT_2022	5	1	11	161	50	29.059	270	0.118533	13.64	28.7097
Rainfed	LT_2022	5	1	11	162	164	17.0075	310	0.0872	13.56	28.7611
Rainfed	LT_2022	5	1	11	163	57	17.211	260	0.0876	18.76	29.7655
Rainfed	LT_2022	5	1	11	164	174	15.3045	300	0.157733	17	27.6706
Rainfed	LT_2022	5	1	11	165	54	16.44	370	0.144229	25.6	32.125
Rainfed	LT_2022	5	1	12	166	113	20.8205	350	0.13488	14.76	31.3008
Rainfed	LT_2022	5	1	12	167	103	18.6905	400	0.2502	15.8	34.8861
Rainfed	LT_2022	5	1	12	168	199	12.052	265	0.0858	18.08	29.7788
Rainfed	LT_2022	5	1	12	169	61	15.3965	315	0.15472	16.16	34.8762
Rainfed	LT_2022	5	1	12	170	124	17.517	300	0.14824	20.24	37.1739
Rainfed	LT_2022	5	1	12	171	171	29.9285	330	0.246	27.04	28.5799
Rainfed	LT_2022	5	1	12	172	139	17.579	410	0.187371	26.72	30.3743
Rainfed	LT_2022	5	1	12	173	9	20.263	260	0.11592	23.92	37.2408
Rainfed	LT_2022	5	1	12	174	207	21.306	350	0.1628	13.64	32.8446
Rainfed	LT_2022	5	1	12	175	24	15.584	200	0.563	21.44	34.5709
Rainfed	LT_2022	5	1	12	176	46	18.2765	260	0.12248	22.12	32.9476
Rainfed	LT_2022	5	1	12	177	155	25.7645	200	0.1124	17.24	35.6381
Rainfed	LT_2022	5	1	12	178	68	33.012	300	0.156533	10.08	25.7937
Rainfed	LT_2022	5	1	12	179	148	23.3625	225	0.1156	26.56	27.5602
Rainfed	LT_2022	5	1	12	180	32	38.6745	310	0.2114	19.12	34.205
Rainfed	LT_2022	5	1	13	181	147	21.6465	275	0.20112	29	36.9517
Rainfed	LT_2022	5	1	13	182	141	13.5115	340	0.2002	23.16	40.9326
Rainfed	LT_2022	5	1	13	183	222	20.053	350	0.149933	18.44	43.5358
Rainfed	LT_2022	5	1	13	184	153	29.9885	380	0.22605	30.36	32.3584
Rainfed	LT_2022	5	1	13	185	40	27.5935	420	0.154343	19	30.2316
Rainfed	LT_2022	5	1	13	186	134	18.122	400	0.31445	22.8	38.6842
Rainfed	LT_2022	5	1	13	187	6	19.016	435	0.187644	27.92	30.9456
Rainfed	LT_2022	5	1	13	188	91	19.444	400	0.229943	24.84	28.4058
Rainfed	LT_2022	5	1	13	189	216	21.083	565	0.4488	30.44	35.2694
Rainfed	LT_2022	5	1	13	190	2	28.3525	435	0.24012	29.64	35.7895
Rainfed	LT_2022	5	1	13	191	80	15.56	350	0.200229	31.6	33.7468
Rainfed	LT_2022	5	1	13	192	100	27.8475	600	0.31924	18.92	41.5222
Rainfed	LT_2022	5	1	13	193	30	24.021	495	0.30205	17.68	35.0905
Rainfed	LT_2022	5	1	13	194	161	21.5955	250	0.29744	25.12	37.7866
Rainfed	LT_2022	5	1	13	195	143	17.4255	435	0.177	29.76	31.0618
Rainfed	LT_2022	5	1	14	196	18	23.677	285	0.0751	37.88	24.3083
Rainfed	LT_2022	5	1	14	197	3	22.4235	400	0.31128	27.84	38.8793
Rainfed	LT_2022	5	1	14	198	77	27.661	510	0.217855	28.48	33.441
[truncated: 1,602 more rows]

## Sheet: Table S5
Table S5. Combined BLUP values ​​for irrigated, rainfed and across all environment
Genotype	Irrigated					Rainfed					All
	GY	SPM	HI	GPS	TGW	GY	SPM	HI	GPS	TGW	GY	SPM	HI	GPS	TGW
1	79.9825	413.33	0.306321	27.2452	48.9851	48.122	343.493	0.23668	26.0045	39.6156	63.8536	373.07	0.273816	26.4006	44.361
2	80.6552	422.914	0.305843	30.4246	51.2365	51.063	386.4	0.257891	27.6401	40.4528	67.7081	406.97	0.281671	29.5177	46.1024
3	80.5648	420.507	0.307811	27.6763	50.2344	50.3939	381.555	0.295886	27.4935	38.9762	66.9119	401.746	0.302189	27.681	44.6559
4	79.5279	429.502	0.308495	28.8944	47.2184	49.6316	360.437	0.23443	28.2291	38.3658	65.3683	396.605	0.278922	28.7989	42.6711
5	78.7679	435.474	0.307547	25.6981	51.4071	48.4977	385.179	0.234218	23.1739	40.0709	63.5347	416.563	0.276501	23.8103	45.9927
6	83.2536	423.798	0.308689	29.9261	53.8894	50.5185	372.743	0.251047	28.0021	37.6331	68.5695	399.559	0.286551	29.4403	45.8933
7	74.9355	398.047	0.308115	28.6488	49.2244	47.2028	351.577	0.241912	24.5928	39.6024	59.73	366.067	0.280732	26.2601	44.5107
8	70.3615	396.918	0.305148	29.5405	47.4252	46.9558	348.155	0.240804	25.2887	39.8059	56.8458	361.984	0.271915	27.4472	43.6183
9	71.46	407.499	0.303585	24.7682	53.7192	47.1041	338.984	0.228827	24.9907	41.7337	57.7122	365.301	0.262528	24.1435	48.175
10	72.3578	446.703	0.307342	25.7795	49.4777	47.9164	357.243	0.252294	23.9373	40.014	59.1168	409.212	0.282774	24.2733	44.8798
11	68.2577	418.971	0.304386	24.0712	48.6341	46.8585	342.869	0.240497	24.1983	39.9333	55.5608	378.168	0.269995	23.2958	44.3182
12	70.5707	423.093	0.308619	28.1541	45.4194	49.4832	385.571	0.263631	28.188	37.382	59.7655	406.866	0.291542	28.2129	41.184
13	75.0807	411.692	0.30603	28.0514	52.2491	49.2368	354.944	0.235575	24.4049	40.291	62.1876	379.183	0.272709	25.7772	46.5418
14	79.8506	413.084	0.306907	31.6962	48.1756	50.1471	332.52	0.241684	26.1124	42.3511	66.1663	365.978	0.277447	29.1585	45.5539
15	73.1807	431.968	0.310646	28.0444	47.4231	50.5222	348.874	0.258047	27.9279	41.172	62.7674	392.261	0.295091	28.0895	44.4408
16	78.5911	420.462	0.310574	34.9793	41.8221	48.8316	353.792	0.24415	31.3383	35.7436	63.9731	385.193	0.288975	34.5406	38.155
17	64.3876	442.999	0.29925	21.9536	49.0692	44.0516	359.771	0.21638	19.1199	42.0223	50.1289	408.598	0.24542	19.091	45.7249
18	81.1867	411.749	0.309385	37.4826	43.3645	49.6563	353.668	0.246383	30.0068	32.6823	66.4149	378.02	0.286588	35.1148	37.2872
19	77.9769	432.292	0.305934	26.6994	48.1104	49.6169	363.726	0.24942	25.2746	40.8808	64.2751	402.002	0.278017	25.4073	44.6132
20	78.1556	423.312	0.303976	26.4589	48.3589	47.8831	364.848	0.239273	23.4157	39.9984	62.5998	394.778	0.268526	24.297	44.2492
21	76.1507	411.551	0.303346	33.8072	41.8608	48.8087	361.187	0.247629	28.4171	35.3155	62.3373	382.584	0.26953	31.7772	37.9646
22	76.9718	412.351	0.306814	34.2012	42.7236	46.7198	364.845	0.236956	29.9732	32.9699	60.6146	385.555	0.275492	33.0234	37.1638
23	77.2823	430.29	0.307586	32.1655	46.3838	49.0117	351	0.245523	27.6162	39.1373	63.3264	392.31	0.281691	30.474	42.7207
24	77.8757	429.244	0.30805	25.8266	50.5038	49.7316	357.436	0.358966	27.7096	40.5608	64.5416	394.499	0.328229	26.6183	45.7599
25	73.5088	427.303	0.307713	32.5404	39.5628	47.8401	371.003	0.253309	30.1358	33.2871	59.8306	402.103	0.284705	32.1453	35.6001
26	72.981	414.017	0.306451	25.8923	50.7236	50.1387	364.098	0.244815	23.8569	42.7688	62.2562	385.999	0.277674	24.4284	47.1072
27	79.67	452.826	0.308867	26.4565	53.7872	50.7782	374.891	0.247947	21.8119	46.4539	66.571	424.91	0.2864	23.4259	50.9742
28	75.7668	443.138	0.308745	28.0391	46.2996	50.8728	378.449	0.254443	27.142	38.087	64.3544	419.249	0.287165	27.6083	42.043
29	74.2736	445.39	0.305875	27.1872	48.552	51.2055	372.098	0.274526	24.8519	39.887	63.9592	417.466	0.287557	25.7304	44.2533
30	69.6976	407.437	0.30641	26.8613	51.0752	48.1584	371.957	0.263199	25.3804	39.4308	57.9696	385.347	0.285107	25.8089	45.396
31	68.8921	424.07	0.308709	27.9711	48.597	47.0755	357.636	0.236546	22.6332	41.4328	56.0308	390.754	0.280322	24.783	45.2491
32	69.2223	403.517	0.304466	26.5106	48.5689	48.7631	356.736	0.25022	26.4052	39.4218	58.1801	372.468	0.27338	26.0979	44.0442
33	75.7573	429.668	0.30964	32.6675	44.0033	50.1841	392.468	0.268119	26.9937	37.4259	63.6928	417.141	0.296407	30.1789	40.4046
34	74.4248	426.399	0.307396	29.7369	46.8932	49.8086	374.771	0.25423	25.3446	38.6349	62.4847	403.797	0.28417	27.3485	42.6238
35	72.0895	428.322	0.307884	28.086	45.2596	50.6054	368.451	0.263968	26.091	38.7816	61.938	401.082	0.28934	26.9655	41.8766
36	74.9636	434.467	0.305959	26.5201	51.0542	49.5726	348.213	0.263529	24.9382	42.0113	62.5265	393.918	0.283721	25.3247	46.8694
37	69.7881	426.924	0.306199	31.1136	41.6485	46.5035	358.765	0.25545	27.403	36.2763	56.0192	394.391	0.28157	29.5365	38.4822
38	72.9844	459.684	0.308929	30.9772	44.0369	48.2742	373.037	0.24823	25.0487	35.2663	60.1379	429.962	0.286352	28.1819	39.2384
39	73.2112	418.908	0.307689	27.6678	50.8582	49.3337	347.584	0.25758	27.0085	42.3792	61.2425	380.523	0.287086	27.4119	47.0189
40	77.4416	420.227	0.305341	28.103	49.867	48.8477	364.055	0.231738	24.7996	37.093	63.2397	390.913	0.268881	26.2294	43.4124
41	75.8375	408.813	0.30857	29.3945	49.4086	49.0188	356.784	0.248475	24.3821	39.9104	62.4563	377.901	0.285177	26.7348	44.7216
42	72.9852	424.364	0.306905	25.2756	47.9862	49.6132	375.628	0.255087	21.9847	38.7606	61.4081	401.936	0.283229	22.6446	43.3608
43	78.4468	413.139	0.308351	29.3572	47.3382	49.7132	378.611	0.266072	28.1191	39.2991	64.8445	394.325	0.291691	28.9475	43.3132
44	71.9522	431.52	0.309645	26.8486	48.9043	48.9349	338.055	0.246407	24.8997	40.1686	59.9622	384.466	0.287317	25.5296	44.6849
45	73.6433	424.973	0.307687	27.0078	48.4428	49.8951	366.698	0.26508	24.3496	45.6253	62.143	396.678	0.289304	25.1558	47.5438
46	70.8634	425.19	0.307984	26.0629	49.6115	49.217	345.293	0.25725	25.2088	39.1242	59.736	383.416	0.286473	25.1483	44.4297
47	83.2286	415.571	0.308567	29.9929	47.2854	49.731	352.47	0.252622	27.7242	35.6735	67.5663	380.445	0.287219	29.1611	41.2147
48	73.976	427.621	0.306843	27.9495	46.0036	47.8045	376.297	0.265036	24.9389	37.0958	59.9037	405.009	0.286452	26.1036	41.2992
49	80.2523	433.302	0.310178	32.1919	43.3158	49.8828	365.296	0.249051	29.251	37.4099	65.9813	403.072	0.290361	31.4057	40.0269
50	80.9557	429.264	0.306998	28.1608	50.6576	49.5877	364.599	0.251471	25.4917	38.1677	66.0243	399.027	0.281535	26.7596	44.4577
51	85.2072	429.215	0.30868	31.38	47.304	48.6951	352.77	0.239288	27.9326	35.8268	67.7171	392.549	0.281736	30.0869	41.2659
52	79.0465	422.649	0.308553	32.5747	44.1327	48.3783	368.963	0.264858	27.1531	37.2863	63.5558	396.519	0.291714	30.2632	40.3512
53	77.8756	400.428	0.308491	29.5365	49.8876	48.9914	351.368	0.23502	26.8242	39.7236	63.7981	366.882	0.27945	28.5715	44.8651
54	79.3151	416.362	0.306296	31.5569	48.6214	50.4274	363.668	0.264761	29.6936	38.1405	66.1178	387.404	0.285546	31.4807	43.3026
55	85.3364	421.45	0.308508	33.534	45.1755	48.6669	382.1	0.259131	27.8271	36.7522	67.7202	404.276	0.289542	31.3067	40.6979
57	76.2764	425.503	0.307089	28.5071	45.6807	48.7894	373.122	0.24187	26.4502	37.8278	62.3745	400.681	0.277967	27.4812	41.5307
58	88.4469	436.8	0.30908	29.7499	51.0542	50.7793	361.301	0.230338	25.1586	42.0464	71.9623	403.441	0.279312	27.542	46.8326
59	79.3274	435.493	0.307553	31.9793	45.7374	48.9311	365.371	0.242845	28.8961	35.9286	64.4691	404.614	0.279662	31.0322	40.4705
60	78.7317	420.512	0.309917	27.3368	52.051	49.2682	352.101	0.24114	23.9578	38.5266	64.3992	384.137	0.286241	25.3412	45.4646
61	77.3357	414.927	0.306007	26.8797	50.7483	49.8609	380.095	0.254391	25.9155	41.677	64.2489	396.537	0.279843	25.9628	46.5134
62	78.5334	429.005	0.307801	29.0212	48.5501	49.0209	369.064	0.251513	27.841	38.0843	63.9798	401.345	0.284266	28.6671	43.2942
63	78.7638	428.086	0.30907	29.1477	45.7858	49.5035	379.712	0.250251	26.9999	37.9974	64.637	406.96	0.28721	28.1671	41.7295
64	85.2682	432.442	0.307778	31.0925	42.5675	49.1701	362.671	0.238272	27.0537	33.0022	68.286	400.611	0.278607	29.5887	37.0021
65	85.7583	444.482	0.306423	29.0758	43.6386	50.706	382.918	0.2515	26.7121	35.4241	70.2644	423.236	0.280097	27.9826	39.0557
66	72.6832	433.558	0.310004	25.9743	51.548	48.569	360.606	0.214977	24.8292	40.3911	60.1048	400.656	0.27565	24.7161	46.2627
67	70.4892	432.05	0.302148	26.1813	53.7359	44.9998	357.279	0.238727	24.2676	42.4364	54.6563	396.813	0.262581	24.6645	48.6348
68	85.3795	445.267	0.310848	29.3535	46.0168	49.1491	382.29	0.24277	25.9452	33.4843	68.1574	423.046	0.289003	27.5464	39.2317
69	77.1247	432.781	0.309717	30.2462	47.0614	49.9855	354.747	0.245662	26.0701	37.3255	64.3894	395.681	0.28736	28.3848	42.0074
70	70.3848	420.48	0.308036	26.2043	47.9539	47.7175	352.527	0.248202	26.2229	38.934	57.6859	384.263	0.284135	26.0154	43.4914
71	68.6186	409.119	0.311362	26.9258	46.7762	48.4667	400.756	0.251993	27.028	37.318	57.564	404.126	0.294642	26.8585	41.8303
72	79.2715	425.225	0.312187	29.4797	49.5798	49.1451	352.617	0.252973	27.1008	40.2317	64.5196	388.59	0.296784	28.348	45.0468
73	75.5958	413.979	0.30931	32.5397	47.1309	48.663	351.552	0.260822	29.1562	38.3728	61.8738	378.292	0.292276	31.6869	42.6037
74	69.0573	412.734	0.309148	27.7292	49.9048	50.1994	371.961	0.266868	27.845	40.7342	59.7839	389.867	0.294872	27.7953	45.5905
75	73.4714	434.483	0.30856	24.9986	50.5368	50.1247	374.345	0.255272	24.7689	40.6931	62.2351	409.412	0.28746	24.329	45.8474
76	75.4471	439.03	0.308443	30.22	45.1603	49.6469	376.541	0.265969	27.4	39.4235	63.0722	415.02	0.292202	29.1184	42.1791
77	75.4842	427.72	0.306957	27.9578	45.7457	51.0757	403.325	0.255141	27.1077	36.4977	64.662	420.786	0.283004	27.7069	40.8337
78	77.0473	428.211	0.306714	28.9109	47.6244	48.6546	363.988	0.259893	25.7827	41.4019	62.7846	398.61	0.284191	27.2324	44.6806
79	73.5885	423.102	0.308261	29.2116	52.6597	49.7851	374.191	0.266685	29.1861	42.8023	61.9356	399.728	0.291697	29.7709	48.2099
80	77.8313	436.332	0.308115	31.174	48.7669	49.8731	364.365	0.255782	26.1332	38.8717	64.7171	404.767	0.287292	29.0242	43.8474
81	74.722	415.131	0.309868	31.482	46.8923	48.5616	358.832	0.258371	28.5391	36.9115	61.2656	383.326	0.293513	30.6557	41.6958
82	78.1777	426.624	0.307876	29.2716	48.3839	50.2437	357.136	0.240536	27.8303	40.4233	65.1861	392.496	0.27963	28.8225	44.5053
83	78.3143	433.402	0.308699	27.7305	47.7404	50.1568	382.695	0.262516	25.3694	38.699	65.037	414.294	0.291324	26.1806	43.1476
84	71.4186	405.027	0.304697	26.2934	48.6825	49.0637	343.446	0.235679	25.1906	43.0866	59.8393	366.016	0.269318	25.4596	46.259
85	78.7029	418.917	0.308523	29.1088	44.6812	49.2539	390.078	0.258756	26.2738	35.9279	64.4682	406.709	0.289231	27.7241	39.9114
86	68.1443	447.749	0.304524	23.0349	49.8967	47.3567	357.063	0.232138	23.1282	40.9422	56.1414	410.165	0.267161	22.1632	45.6629
87	80.5177	441.704	0.30834	31.3665	44.6213	49.5451	408.63	0.241234	25.6215	33.8728	65.8583	436.785	0.281693	28.7901	38.6377
88	77.2268	412.799	0.308037	29.0525	50.71	49.8867	335.543	0.237402	26.0461	42.0747	64.2691	368.283	0.27967	27.6635	46.7666
89	74.1571	436.412	0.310077	30.0479	43.5935	49.0795	378.466	0.251872	28.8804	35.9054	61.4616	413.648	0.290748	29.8608	39.299
90	74.0384	403.027	0.304121	25.7605	51.3321	48.0312	339.876	0.242793	24.7423	41.0272	60.2489	362.257	0.270032	24.7415	46.4522
91	80.8681	444.869	0.309974	32.1963	43.9793	49.2505	352.957	0.252246	28.9986	32.6153	65.8345	404.868	0.290967	31.4375	37.6138
92	72.0604	411.609	0.308188	30.9394	44.4015	47.514	330.531	0.225156	29.0421	36.2831	58.498	364.158	0.274859	30.5376	39.9521
93	75.3403	434.5	0.305502	28.1616	50.0943	47.19	345.892	0.236404	25.8447	41.185	60.0839	392.259	0.271876	26.9144	45.8948
94	83.0345	445.327	0.307887	27.4538	50.5878	49.8333	356.682	0.262986	25.4043	37.4648	67.5868	408.603	0.289137	26.0392	43.9835
95	79.6247	418.282	0.305434	26.7789	49.1448	47.9457	348.195	0.233761	23.9475	41.2557	63.5442	379.428	0.269821	25.0071	45.3884
96	77.5104	443.371	0.308822	27.5617	51.486	48.1809	357.484	0.264731	24.0934	42.2	62.6675	407.392	0.292831	25.4395	47.3267
97	74.4023	423.352	0.308705	29.8357	43.9386	48.139	371.61	0.252185	27.5393	36.6768	60.5887	399.388	0.286963	28.9658	39.8662
98	78.6937	435.141	0.30866	30.1801	46.5415	48.8025	369.149	0.240779	26.0086	36.1654	63.9117	406.947	0.282095	28.2002	40.9989
99	79.4968	442.676	0.308129	27.8532	45.5293	49.0979	371.849	0.248588	27.5091	37.4761	64.6732	415.459	0.283822	27.8502	41.1746
100	72.6318	423.67	0.305455	26.0148	50.3305	50.2736	398.96	0.262251	24.2074	41.8857	62.1759	415.147	0.281984	24.7444	46.4025
101	75.5813	406.896	0.307169	26.7893	50.2982	50.2641	371.583	0.261766	25.084	41.0951	63.6937	385.309	0.286594	25.6341	45.8843
102	72.9309	419.084	0.304294	29.8006	45.3544	47.7912	364.171	0.234166	24.2305	40.1576	59.4542	390.598	0.26697	26.8696	42.6931
103	77.5645	426.975	0.305474	25.802	52.4612	50.6276	381.21	0.252465	24.0929	43.3943	65.2172	407.345	0.277429	24.3924	48.4091
104	85.6966	414.233	0.309295	32.041	45.6904	49.8904	350.793	0.25006	30.3591	35.8993	69.0911	378.854	0.287952	31.82	40.4285
105	74.8695	417.491	0.303934	32.5288	44.9796	48.4707	358.784	0.24781	26.8027	37.2951	61.2571	384.816	0.271422	30.2282	40.8772
106	74.8489	421.166	0.306084	29.4056	46.5761	48.4115	364.715	0.247961	26.6902	37.2409	61.099	392.53	0.277968	28.1344	41.7489
107	77.7801	436.56	0.309281	30.7052	48.5307	48.7354	372.017	0.25884	26.0623	37.5439	63.4214	409.355	0.291298	28.5788	42.9058
108	81.2552	417.352	0.310964	29.5886	47.5766	51.0976	361.7	0.266578	27.2792	37.271	68.1681	387.856	0.29947	28.5975	42.3028
109	69.4868	424.086	0.304323	24.71	45.3797	46.2147	369.621	0.244388	22.3929	38.7267	55.5091	398.121	0.271314	22.6702	41.8556
110	70.5166	422.203	0.308624	26.8804	48.3654	47.9211	335.052	0.224182	26.1913	40.6237	57.9706	375.425	0.275388	26.4188	44.6243
111	68.1865	410.264	0.305698	23.1051	52.2131	48.6511	353.408	0.266274	25.5354	43.0493	57.5023	376.129	0.283728	23.7735	48.1305
112	79.1175	427.098	0.308755	31.1593	48.854	49.8153	361.197	0.237736	25.5477	40.1483	65.471	395.522	0.281583	28.599	44.6612
113	71.7946	414.728	0.305506	24.6427	50.6481	49.4199	372.702	0.25294	21.7468	40.2989	60.4851	391.357	0.277684	22.1838	45.6757
114	74.9817	409.482	0.308824	30.3048	49.4238	49.9725	357.312	0.239843	27.4169	40.133	63.1184	378.662	0.282551	29.2111	44.9358
115	71.865	441.093	0.306178	27.2653	51.1308	47.3535	357.779	0.237117	25.6425	39.7187	58.3604	405.005	0.273669	26.1544	45.6237
116	79.6434	446.178	0.310277	28.2975	46.9701	47.4901	361.945	0.248259	22.9548	39.8833	62.8928	412.495	0.289964	25.0231	43.4306
117	77.4179	426.018	0.309059	29.7773	47.9175	49.9434	353.271	0.231434	26.1233	37.0785	64.5547	389.131	0.279508	28.0694	42.3043
118	74.2398	400.314	0.305965	31.2946	52.3901	49.3544	358.132	0.254831	29.2516	40.4521	61.8995	371.164	0.28005	30.8891	46.8041
119	78.956	413.472	0.307002	30.625	49.6667	49.8864	355.516	0.242217	29.7984	36.2539	65.2646	380.259	0.278041	30.6714	42.8765
120	73.7623	437.587	0.304682	25.9845	50.5772	48.6712	356.279	0.250256	24.7677	40.1082	60.7189	401.715	0.274391	24.9099	45.5356
121	73.7716	414.131	0.309448	30.5444	44.5334	48.1186	359.233	0.253539	27.8418	35.9837	60.1725	383.236	0.290139	29.6123	39.9373
122	75.1294	417.712	0.307244	28.8368	52.486	49.2994	344.502	0.255045	27.481	40.0875	62.4619	376.849	0.283978	28.3797	46.5322
123	76.5882	420.886	0.306304	29.3634	48.8309	49.0264	354.411	0.237575	27.6108	39.6562	62.9689	386.784	0.274661	28.7913	44.4111
124	72.2836	411.374	0.306514	29.3139	50.1462	47.8757	334.223	0.24172	25.9948	40.6761	59.0517	365.126	0.275992	27.5755	45.6153
125	69.6617	431.158	0.307919	27.1182	45.1828	47.8345	351.809	0.243752	24.7503	37.5996	57.3686	393.018	0.280457	25.5805	41.1529
126	67.202	438.54	0.302446	25.0771	49.6805	47.8619	377.559	0.25457	23.1624	41.5174	55.9066	415.724	0.269717	23.2659	45.8517
127	68.5579	411.461	0.304112	24.3572	45.9005	49.2123	348.168	0.248818	24.6509	40.6826	58.3705	374.648	0.272562	24.0663	43.2508
128	71.2546	444.122	0.308916	30.8491	44.0917	48.553	366.37	0.254262	27.2495	37.4255	59.2435	412.694	0.289078	29.2656	40.5177
129	76.7377	419.46	0.309444	30.825	48.2211	49.4155	367.214	0.262258	27.5336	38.6481	63.3447	392.143	0.293166	29.4875	43.4357
130	72.412	429.133	0.305747	26.5389	47.8433	48.9875	350.447	0.225934	23.9078	39.789	60.5135	390.426	0.268014	24.872	43.7858
131	72.9684	428.973	0.307718	28.7174	47.1564	49.1224	370.727	0.262077	27.8725	37.4819	60.8213	402.604	0.287828	28.4487	42.1643
132	75.5904	426.316	0.309759	31.8857	41.3895	47.5748	372.834	0.275568	29.7271	32.8702	60.6897	402.08	0.299558	31.6571	36.3265
133	79.8515	441.259	0.31032	31.3332	45.2526	49.015	368.192	0.254647	29.1491	34.605	64.8855	411.046	0.292421	30.8224	39.414
134	76.844	405.03	0.307286	30.3784	50.9385	50.5528	362.611	0.272523	28.2316	37.5581	64.858	377.619	0.291436	29.7662	44.2651
135	76.5848	420.703	0.308339	27.9371	47.2237	47.8564	369.868	0.260701	22.4248	37.5661	61.4529	395.873	0.289557	24.4745	42.2189
136	68.8506	426.583	0.303259	24.1157	48.4056	46.1776	375.409	0.224887	21.813	38.5196	55.0553	403.83	0.260262	21.8629	43.4323
137	76.5587	436.321	0.309425	28.2827	46.057	46.9943	372.483	0.241267	26.9682	35.7427	60.7354	409.849	0.284747	27.8002	40.5011
138	79.5545	438.899	0.310603	31.1766	47.624	50.6788	371.654	0.269788	26.9063	39.8729	66.472	411.832	0.299512	29.295	43.7322
139	71.6921	416.166	0.308259	27.6541	46.1482	48.622	384.213	0.249205	26.4172	37.8291	59.5351	399.566	0.284037	26.8589	41.801
140	72.7664	450.174	0.307182	24.614	47.7052	47.7577	358.357	0.244467	24.9702	40.3945	59.0923	413.494	0.279648	24.0949	44.0941
141	70.3599	411.771	0.323235	27.128	48.6275	48.5466	356.015	0.245826	26.2141	38.9004	58.7913	378.964	0.326555	26.6559	43.7849
142	73.3447	415.549	0.308643	29.7997	48.5938	48.4723	362.008	0.266152	25.5356	39.2191	60.3756	385.399	0.292483	27.7328	43.9039
143	71.285	436.15	0.304518	26.8009	43.7324	48.9745	375.964	0.242817	25.7628	36.2108	59.8348	411.271	0.271242	26.1165	39.5288
144	79.62	400.926	0.307628	30.4187	47.5258	50.0456	372.779	0.269222	29.0873	37.5886	65.7199	381.001	0.291447	30.1398	42.4506
145	80.8321	433.847	0.31144	30.1712	47.6284	48.6027	346.838	0.237678	25.7753	39.9301	65.0603	392.695	0.289417	28.0494	43.8652
146	72.7312	449.156	0.30808	23.494	54.6052	48.2052	353.193	0.246217	23.2166	45.8032	59.5467	409.37	0.282467	22.2883	50.9898
147	78.9143	428.508	0.307474	28.6686	47.113	49.2321	364.188	0.247048	27.8474	36.1535	64.6033	397.473	0.281234	28.6114	41.4014
148	71.8822	412.106	0.308749	28.9652	49.0391	47.7517	336.428	0.251255	28.7918	37.6982	58.7464	367.401	0.286538	29.2145	43.3013
149	78.5094	406.843	0.308261	28.8092	46.4128	49.8148	370.507	0.254224	29.0108	36.5953	64.8941	383.899	0.286488	29.3008	41.2763
150	69.0799	435.537	0.30887	25.2952	52.2912	48.3285	362.404	0.253628	25.1533	43.6176	57.7582	403.224	0.288075	24.7887	48.4252
151	69.9729	413.484	0.309458	27.7009	52.4794	49.0152	347.684	0.254746	25.4398	42.3208	58.8941	375.776	0.289722	26.2679	47.8271
152	78.5449	417.84	0.310822	31.3521	46.4442	49.0313	361.089	0.254531	27.605	36.042	64.0204	387.91	0.294117	29.8828	40.8615
153	70.6804	425.789	0.310107	31.4646	46.5162	48.4407	363.049	0.252913	27.8264	38.3118	58.9054	395.156	0.291805	30.2467	42.2942
154	68.7146	411.906	0.302923	25.4191	50.4573	48.265	336.233	0.228983	25.7937	42.9407	57.5383	366.723	0.260848	25.3941	47.0879
155	72.0731	421.836	0.302447	26.3431	49.9775	49.0472	364.698	0.239899	24.5377	41.4514	60.2597	392.426	0.263618	24.8969	45.956
156	71.55	411.147	0.30647	27.2486	49.3588	48.9906	352.5	0.245741	23.1168	41.4536	59.9553	377.645	0.27828	24.6761	45.6703
157	73.5643	433.099	0.308623	29.7161	48.0581	48.3957	351.749	0.245675	25.673	42.4026	60.4331	395.279	0.28442	27.724	45.5348
158	74.077	424.97	0.308356	26.7779	47.7091	47.8428	362.733	0.240028	27.5568	38.7936	60.1428	395.058	0.281058	27.2918	43.1293
159	68.667	389.996	0.304448	28.6292	53.7595	48.5578	343.367	0.256905	26.0464	43.1233	57.6284	353.462	0.276256	27.3463	48.9663
160	85.1568	421.898	0.308635	31.2821	46.3621	49.6546	359.191	0.25708	28.7222	37.5468	68.634	390.193	0.289235	30.5672	41.7858
161	78.3902	427.886	0.308744	33.4773	48.2537	50.2873	350.673	0.256483	28.5561	39.0049	65.5436	389.63	0.289236	31.8597	43.6946
162	77.8673	417.046	0.309568	31.0082	48.1275	49.7897	358.326	0.277114	28.9263	38.1946	64.5234	385.868	0.299914	30.5056	43.1758
163	78.1998	412.174	0.308192	33.1045	49.0345	48.3522	342.552	0.23707	26.9427	39.5041	63.2332	371.588	0.279462	30.3957	44.3955
164	76.1993	416.536	0.308093	28.6254	48.18	48.9418	336.487	0.233093	25.7664	40.0012	62.5685	371.169	0.277659	27.1911	44.1396
165	68.7859	414.868	0.304717	27.1681	45.2176	47.5938	351.076	0.23904	24.6369	38.4728	56.768	379.319	0.270466	25.703	41.5851
166	78.8056	428.787	0.311054	28.1859	48.9873	48.9377	352.078	0.232226	25.347	41.6935	64.1265	391.875	0.285878	26.6193	45.6405
167	75.259	424.662	0.309169	27.7033	47.1459	49.7	376.779	0.253199	26.5355	41.1313	62.9739	403.362	0.288793	27.0514	44.201
168	74.3215	424.639	0.304409	25.4672	47.43	47.5838	376.123	0.218571	23.7794	39.1914	59.9519	402.68	0.261093	24.1799	43.2401
169	79.6702	425.254	0.307922	32.4441	43.1609	47.7707	371.551	0.234757	29.838	33.0118	63.4264	400.01	0.277587	32.1142	37.333
170	80.2544	410.887	0.303907	29.1761	46.083	48.4288	361.903	0.232586	25.5871	37.9827	64.3886	382.426	0.264872	27.3597	41.8145
171	77.8164	422.363	0.310178	30.2202	43.5311	50.0268	382.199	0.266118	28.6045	35.5986	64.7719	403.816	0.296443	29.9169	39.0603
172	76.7097	418.932	0.309081	34.3716	44.4492	48.605	355.562	0.252239	30.5399	31.9069	62.4938	384.785	0.288273	33.5429	37.4826
173	85.2523	435.244	0.307666	27.641	53.4864	51.1803	368.63	0.259729	24.1685	43.3012	70.4792	406.734	0.287134	25.6037	48.9511
174	78.0281	424.597	0.310662	28.5842	49.1746	50.2061	381.982	0.27448	26.9579	37.9923	65.091	405.525	0.302143	27.9978	43.5655
175	73.5054	408.708	0.307747	27.5359	47.8868	49.6607	368.325	0.263824	26.3952	39.7329	61.7541	384.099	0.289041	27.0221	43.7931
176	69.0919	428.171	0.308464	25.3045	47.5392	48.5134	364.218	0.239024	25.9399	39.3708	58.0202	398.485	0.281193	25.3455	43.468
177	73.8054	421.995	0.309947	29.9738	47.4092	49.0752	351.655	0.255655	26.619	39.7155	61.2558	385.79	0.292054	28.2853	43.5597
178	76.353	440.481	0.308274	26.9869	48.6667	50.1787	358.834	0.246715	24.7502	40.878	64.1143	405.707	0.283619	25.527	44.9169
179	76.2524	436.134	0.310719	28.667	45.9681	49.4361	381.242	0.259286	26.4742	37.8595	63.1077	415.689	0.295793	27.5251	41.655
180	78.7235	411.504	0.306918	29.176	47.7719	50.7442	392.346	0.258051	27.5097	38.8723	66.2403	401.985	0.284679	28.5122	43.3941
181	76.8701	382.299	0.305817	32.6745	50.1068	50.0295	350.665	0.234144	30.0222	42.0097	64.1598	352.422	0.271669	32.0561	46.4397
182	78.5996	429.004	0.305398	25.7188	55.1512	48.4166	372.152	0.250319	23.0935	40.9257	63.4608	404.024	0.277216	23.8963	48.5036
183	82.242	413.249	0.304863	29.1692	52.8526	48.3222	334.59	0.214798	24.9359	42.4455	65.4979	367.947	0.261092	26.839	48.1076
184	73.2667	407.51	0.304826	25.5631	55.3689	49.5489	359.674	0.235381	22.2032	42.4356	61.4031	377.653	0.26831	23.0046	49.4898
185	82.3259	429.89	0.310204	27.9539	46.5563	49.9153	363.735	0.26118	26.1291	37.9302	67.3964	399.249	0.295055	26.8918	42.0491
186	81.942	416.15	0.30883	35.0894	44.4066	49.7508	358.073	0.229427	28.9149	32.8593	66.9142	384.873	0.278316	32.9578	37.9619
187	78.1863	411.054	0.308001	28.4314	49.9871	49.8573	357.337	0.244895	23.9093	42.4618	64.7237	379.939	0.281668	25.7205	46.6012
188	78.6297	419.392	0.307501	30.465	49.2528	50.8081	365.912	0.257257	29.9089	38.8752	66.1128	391.906	0.285462	30.9384	44.0516
189	80.0916	425.864	0.309916	25.891	51.5315	48.3057	379.684	0.254251	24.5208	40.2454	64.0534	405.832	0.291202	24.5907	46.1297
190	74.4654	418.067	0.308004	28.2727	50.7085	48.7503	376.157	0.260358	24.3889	42.2239	61.4344	397.33	0.288627	25.9761	46.935
191	77.5222	403.607	0.308584	31.0724	45.8517	49.2776	364.231	0.261702	27.7937	38.7052	63.7943	377.917	0.29072	29.9651	42.0652
192	77.9489	408.048	0.307436	28.892	50.9678	50.5133	351.434	0.248386	27.9528	39.6488	65.4781	373.407	0.281971	28.7707	45.4194
193	78.1235	423.001	0.30442	28.4714	51.7472	48.3381	340.34	0.220834	24.9177	40.4382	63.0583	378.743	0.261776	26.4489	46.444
194	75.456	426.606	0.307325	28.3193	43.7196	48.2849	364.635	0.242519	27.1853	36.9464	61.2859	397.023	0.278259	27.8003	39.9783
195	78.4099	414.642	0.307784	30.0522	48.0048	48.5917	345.867	0.261094	27.5225	38.5514	63.4682	376.213	0.28793	29.1552	43.1447
196	76.1664	413.337	0.30883	31.0555	48.0301	50.0921	346.456	0.239638	26.7163	37.3974	63.8598	374.91	0.282115	29.1558	42.5171
197	77.9937	415.281	0.305817	25.9143	53.6457	48.7121	352.207	0.236275	24.0163	44.6232	63.3766	380.58	0.272572	24.4614	49.8034
198	75.0982	415.334	0.307552	26.8536	49.072	48.217	350.864	0.244436	25.6362	38.9061	61.1402	378.743	0.280318	25.9409	44.1041
199	77.1926	433.657	0.30675	28.5365	48.0716	49.2071	355.6	0.234899	24.7939	40.2308	63.4294	396.763	0.273887	26.3716	44.2239
200	78.4068	408.721	0.30703	29.121	43.5678	49.5933	367.605	0.250564	26.8442	36.7248	64.7138	383.791	0.281478	28.2961	39.6713
201	79.4633	405.113	0.307669	29.6273	48.4046	48.9352	375.205	0.251222	28.5153	40.1757	64.4879	385.835	0.28364	29.3551	44.3942
202	72.5279	420.159	0.302751	26.6925	47.8454	47.775	337.819	0.228161	24.9677	40.9151	59.0464	374.717	0.259683	25.466	44.4892
203	77.2866	402.266	0.305359	27.7434	52.9562	49.5097	359.939	0.21948	27.9855	39.6447	63.6924	373.934	0.263819	27.9714	46.621
204	80.337	439.533	0.309613	29.1209	45.4626	49.2849	410.728	0.265433	26.181	36.2576	65.3834	435.989	0.295098	27.7109	40.5416
205	78.6997	423.208	0.305339	30.0868	44.785	47.4715	352.803	0.226256	26.8914	37.4357	62.4576	387.378	0.267029	28.9083	40.8063
206	76.8683	434.723	0.304855	29.7859	41.0195	47.8417	367.618	0.221825	26.3864	33.1771	61.7433	405.876	0.264234	28.2686	36.3077
207	75.2353	431.938	0.309888	29.9331	47.7037	49.1314	360.691	0.251722	26.4083	39.4148	62.1977	398.939	0.289823	28.0694	43.555
208	81.2664	422.851	0.31014	28.0111	51.5154	49.8267	344.623	0.256663	25.9427	43.4234	66.4896	382.377	0.293304	26.8004	47.9647
209	72.8167	384.902	0.304501	27.1881	48.1426	48.46	351.154	0.250913	26.3669	40.057	60.0124	354.015	0.274927	26.6645	44.1818
210	75.1202	419.351	0.310056	30.7386	45.9412	48.0115	362.006	0.247472	29.387	36.4741	60.8995	389.221	0.288853	30.7323	40.9703
211	81.8177	423.034	0.307813	33.3589	44.6778	48.8047	372.332	0.248782	27.4793	34.6637	65.7296	399.473	0.283175	30.923	39.1577
212	77.3504	413.421	0.306471	27.7195	51.782	49.1394	367.047	0.250794	26.822	43.3102	63.4984	387.722	0.28019	27.0957	48.0649
213	73.9222	407.708	0.305571	27.5285	51.0697	48.3679	352.766	0.244784	26.0606	43.3349	60.6633	374.77	0.275506	26.747	47.7345
214	73.4694	430.771	0.307866	27.5394	48.5253	48.7624	373.665	0.255583	25.5105	40.6415	60.8097	406.45	0.286371	26.4326	44.6785
215	75.5468	409.306	0.308411	29.1454	47.7283	48.7539	336.635	0.250778	27.5146	40.2881	61.9551	365.116	0.285155	28.5642	44.0981
216	74.7742	418.956	0.305451	29.5811	47.6164	49.8659	376.91	0.268515	27.3081	38.6985	62.8043	398.069	0.284087	28.7359	43.0969
217	72.3914	429.314	0.306298	29.1347	47.6544	49.9886	356.714	0.26252	25.5971	37.652	61.3774	394.072	0.283556	27.2177	42.5341
218	76.2264	404.79	0.306273	28.587	49.9879	48.7137	345.99	0.248733	24.4576	39.014	62.3542	367.38	0.278729	26.291	44.5088
219	73.7804	430.134	0.304978	27.156	47.4082	47.5771	341.587	0.223668	24.3806	40.6809	59.6342	385.741	0.264464	25.5056	44.0977
220	78.0186	429.581	0.309145	30.2771	48.3625	49.3295	359.445	0.256263	25.7156	41.9484	64.0426	396.72	0.290041	28.076	45.2781
221	78.1166	417.925	0.305856	26.2298	50.4907	48.5815	371.191	0.230034	25.0322	41.0337	63.4088	393.278	0.269985	25.372	46.0005
222	71.6908	422.383	0.305843	25.6238	50.981	47.7156	346.295	0.239429	23.0846	40.5658	58.588	381.903	0.273444	23.7028	46.0016
223	78.3565	445.222	0.309844	25.3031	52.2639	48.6289	383.024	0.257422	23.0849	41.565	63.445	423.546	0.292146	23.5423	47.3208
224	73.6643	416.242	0.305581	24.8233	55.7675	48.8397	350.052	0.246415	25.8795	42.9708	61.1468	379.297	0.275791	25.2056	49.9395
225	77.9973	416.188	0.306386	30.4024	52.1946	46.5573	337.948	0.220976	25.0556	40.5547	60.9605	371.885	0.267603	27.7851	46.7025

## Sheet: Table S6
Table S6. The three most tolerant and susceptible genotypes according to the YTI of the panel of 225 genotypes evaluated in Santa Rosa during the 2021-22 growing season
Code	ID	Irrigation yield (g)	Rainfed yield (g)	YTI
G1	QUC 3418-2020	10.9828	5.51508	0.676965
G2	QUC 3592-2020	11.863	5.41523	0.717984
G3	BRESCIA	8.57015	2.69457	0.258095
G4	QUC 3678-2016	11.7917	4.99507	0.658291
G5	QUC 3572-2018	7.64733	2.96595	0.253498
G6	QUC 3319-2020	6.06385	1.7004	0.115239

## Sheet: Table S7
Table S7. Combined analysis of variance for yield-related traits of 225 elite durum wheat genotypes growing across eight environments
Env	SOV	DF	Sum of squares (% of total)
			GY	TGW	HI	GPS	SPM
All	ENV	7	1953113.481 (79.8%) *	136681.952 (63.22%) *	14.143 (55.88%) *	147345.657 (58.74%) *	16889319.826 (42.66%) *
	GEN	224	109802.906 (4.48%) *	41374.761 (19.13%) *	2.388 (9.43%) *	38549.798 (15.36%) *	4668855.722 (11.79%) *
	ENV x GEN	1568	384483.757 (15.71%) *	38141.302 (17.64%) *	8.777 (34.67%) *	64920.739 (25.88%)	18025703.611 (45.53%)
Irrigated	ENV	3	2440.53716 (66.5%) *	5781.65688 (29.63%) *	1.88893 (46.74%) *	26421.22343 (60.68%) *	1709731.75463 (26.90%) *
	GEN	224	5.97236 (12.15%) *	113.49813 (43.43%) *	0.00807 (14.91%) *	112.83097 (19.35%) *	18054.10243 (21.21%) *
	ENV x GEN	672	3.49729 (21.34%) *	23.45375 (26.92%) *	0.00692 (38.34%) *	38.79769 (19.96%)	14713.28365 (51.87%)
Rainfed	ENV	3	1879.32426 (81.79%) *	14946.00142 (53.91%) *	2.32213 (59.66%) *	20881.80346 (54.58%) *	3198025.5 (52.26%) *
	GEN	224	1.63783 (5.32%) *	97.82768 (26.34%) *	0.00715 (13.72%) *	94.48861 (18.44%) *	13173.08718 (16.07%) *
	ENV x GEN	672	1.32143 (12.88%)	24.43179 (19.74%) *	0.00462 (26.60%) *	46.0698 (26.97%)	8649.31882 (31.66%)
* significance at 5%

## Sheet: Table S8
Table S8. Mean phenotypic variation and standard deviation for yield-related traits evaluated in the eight environments and yield loss percentage in each site due to drought
		Trait
		GY		TGW			HI			GPS			SPM
Site	Trt	mean	sd	mean	sd		mean	sd		mean	sd		mean	sd		Yield loss (%)
LT_2022	Irrigated	4.3	1.66	47.8	6.24		0.216	0.126		384	126		17.7	8.23
	Rainfed	2.31	0.805	33.9	5.91		0.168	0.0818		312	91.8		16.7	6.49		46.2791
LT_2023	Irrigated	7.66	2.45	43.7	5.67		0.309	0.0631		525	153		31	6.4
	Rainfed	6.33	1.77	35.4	4.99		0.26	0.0564		511	138		29.6	6.02		17.3629
SR_2022	Irrigated	9.46	1.51	52.4	5.23		0.359	0.0567		469	98.8		30.5	5.77
	Rainfed	4.22	0.667	41.8	4.79		0.32	0.0606		366	65.1		29.1	4.96		55.3911
SR_2023	Irrigated	8.98	1.69	48.8	5.78		0.347	0.0609		416	93.2		35.6	6.54
	Rainfed	6.72	1.02	45.9	6.06		0.32	0.069		408	83.9		32.6	5.67		25.167

## Sheet: Table S9
Table S9. Genetic and phenotypic correlations between yield related traits under rainfed, irrigated, and across all environments
Correlation	Environment	Traits	SPM	GY	HI	GPS
Genetic	Rainfed	GY	0.515431
		HI	0.673482	0.924501
		GPS	-0.0937964	0.51793	0.462663
		TGW	-0.258597	0.0399969	-0.171554	-0.771139
	Irrigated	GY	0.0138661
		HI	-0.380185	0.503543
		GPS	-0.354246	0.611385	0.9999
		TGW	-0.406396	-0.180813	-0.771057	-0.654558
	Across	GY	0.221262
		HI	0.309557	0.501822
		GPS	-0.244983	0.552207	0.532348
		TGW	-0.281764	-0.217116	-0.325934	-0.703549
Phenotypic	Rainfed	GY	0.373577
		HI	0.422415	0.445829
		GPS	-0.0402122	0.322473	0.275243
		TGW	-0.150021	0.0101616	-0.0781402	-0.553555
	Irrigated	GY	0.283688
		HI	0.189754	0.307974
		GPS	-0.0660314	0.515584	0.374994
		TGW	-0.176939	-0.13474	-0.206339	-0.5429
	Across	GY	0.297277
		HI	0.308396	0.384576
		GPS	-0.115162	0.471846	0.372526
		TGW	-0.185937	-0.156243	-0.192661	-0.611513
Values ​​in bold are significant at p < 0.05

## Sheet: Table S10
Table S10. Distribution of the SNPs in the durum wheat genome
Chr	N SNP	Size (Mbp)	Density	GAP (Mbp)
1A	900	593.551	1.516	0.659
1B	1082	689.001	1.57	0.636
2A	926	780.715	1.186	0.843
2B	1134	801.254	1.415	0.706
3A	756	749.469	1.009	0.992
3B	934	829.542	1.126	0.889
4A	631	744.522	0.848	1.177
4B	644	673.251	0.957	1.046
5A	797	708.442	1.125	0.89
5B	945	712.972	1.325	0.748
6A	898	617.69	1.454	0.688
6B	802	720.716	1.113	0.9
7A	1061	736.692	1.44	0.694
7B	988	750.606	1.316	0.76

[truncated: 12 more sheets: Table S11, Table S12, Table S13, Table S14, Table S15, Table S16, Table S17, Table S18, Table S19, Table S20, Table S21, Table S22]
